# Supplementary material for: Potential Involvement of the South American Lungfish Intelectin-2 in Innate-Associated Immune Modulation
Source: MDPI journal article supplement (doi:10.3390/ijms25094798), 2024-04-27
Supplement: s1 [file s1]

**Supplementary Table S1.** Protein-ligand interaction of *LpITLN2-B* in the Calcium-binding site by GOLD.

| Carbohydrate                | H-bond (H-distance)                                                 | Hydrophobic interaction                                                |
|-----------------------------|---------------------------------------------------------------------|------------------------------------------------------------------------|
| Arabinose                   | His289 (3.03 Å)                                                     | Tyr269; Glu270; Asn286; Glu288; Gln300                                 |
| Fructose                    | His289 (2.86 Å)                                                     | Glu270; Asn286; Glu288; Gln300                                         |
| Fucose                      | His289 (3.03 Å); Asn286 (2.92 Å)                                    | Tyr269; Glu270; Glu288; Gln300                                         |
| Galactose                   | His289 (2.74 Å); Asn286 (2.88 Å)                                    | Glu270; Glu288; Gln300; Trp314; Trp323                                 |
| Glucose                     | His289 (2.76 Å); Asn286 (2.83 Å)                                    | Glu270; Glu288; Gln300; Trp323; Trp314                                 |
| <i>N</i> -acetylglucosamine | Asn286 (2.53 Å); Asn268 (2.60 Å)                                    | Glu270; Glu288; His289; Thr305; Trp 314; Trp323                        |
| Lactose                     | His289 (2.78 Å)                                                     | Asn268; Tyr270; Glu270; Cys285; Asn286; Glu288; Gln300; Trp314; Trp323 |
| Lipopolysaccharide          | His289 (3.31 Å); Glu288 (2.28 Å); Asn286 (2.53 Å)                   | Tyr269; Glu270; Gln300; Val304; Ala313; Trp314; Trp323                 |
| Maltose                     | Asn286 (2.99 Å; 2.53 Å) Glu288 (2.28 Å); Tyr269 (2.59 Å)            | Asn268; Glu270; Cys285; Gln300; Trp314; Trp323                         |
| Mannose                     | His289 (2.76 Å) Asn286 (3.01 Å)                                     | Glu270; Glu288; Gln300; Trp314; Trp323                                 |
| Poly(I:C)                   | Glu270 (2.93 Å); Asn286 (2.53 Å); Glu288 (2.42 Å); His289 (2.77 Å); | Gln300; Trp323                                                         |
| Rhamnose                    | His289 (3.03 Å); Asn286 (2.92 Å)                                    | Tyr269; Glu270; Glu288; Gln300                                         |
| Ribose                      | -                                                                   | Glu270; Asn286; Glu288; His289; Gln300; Thr305; Trp314                 |
| Sucrose                     | His289 (2.90 Å); Glu288 (2.28 Å); Asn286 (3.01 Å; 2.53 Å)           | Tyr269; Glu270; Gln300; Trp314; Trp323                                 |
