# Supplementary material for: Potential Involvement of the South American Lungfish Intelectin-2 in Innate-Associated Immune Modulation
Source: MDPI journal article supplement (doi:10.3390/ijms25094798), 2024-04-27
Supplement: s1 [file s1]

**Supplementary Table S2.** Protein-ligand interaction of *LpITLN2-B* in the Calcium-binding site by DockThor.

| Carbohydrate        | H-bond (H-distance)                                                        | Hydrophobic interaction                                                                                 |
|---------------------|----------------------------------------------------------------------------|---------------------------------------------------------------------------------------------------------|
| Arabinose           | Asn286 (2.25 Å)                                                            | Tyr269; Glu270; Glu288; Gln300; Trp314; Trp323                                                          |
| Fructose            | Glu270 (2.91 Å) Glu288 (2.66 Å; 2.57 Å); His289 (2.72 Å)                   | Asn286; Gln300; Trp314                                                                                  |
| Fucose              | Glu270 (2.73 Å); Glu288 (2.47 Å; 2.53 Å); His289 (2.54 Å)                  | Asn286; Gln300; Trp314; Trp314                                                                          |
| Galactose           | Glu270 (2.47 Å); Glu288 (2.52 Å); His289 (2.79 Å)                          | Tyr269; Asn286; Gln300; Trp314                                                                          |
| Glucose             | Glu270 (2.62 Å); Glu288 (2.84 Å; 2.65 Å); His289 (2.99 Å); Trp314 (2.75 Å) | Asn286; Gln300                                                                                          |
| N-acetylglucosamine | Asn286 (2.53 Å); Asn268 (2.60 Å)                                           | Glu270; Glu288; His289; Thr305; Trp 314; Trp323                                                         |
| Lactose             | Asn286 (2.97 Å); His289 (2.28 Å); Gln300 (2.35 Å); Trp314 (3.35 Å);        | Trp323                                                                                                  |
| Lipopolysaccharide  | Asn115 (3.18 Å); Ser310 (3.43 Å); Ala313 (3.44 Å)                          | Ile116; Lys119; Glu288; Gln300; Gly301; Val304; Thr305; Cys306; Gly307; Phe309; Gly311; Phe312; Trp314; |
| Maltose             | Asn286 (2.88 Å); Gln300 (2.70 Å)                                           | Trp314; Trp323                                                                                          |
| Mannose             | Glu270 (2.79 Å; 2.71 Å); Glu288 (2.58 Å; 2.54 Å); His289 (2.75 Å)          | Tyr269; Asn286; Gln300; Trp314; Trp323;                                                                 |
| Poly(I:C)           | Gln300 (2.50 Å); Trp314 (2.26 Å; 2.88 Å)                                   | Asn286; Gly301; Trp323                                                                                  |
| Rhamnose            | Asn286 (2.92 Å; 2.95 Å); Glu288 (2.53 Å); His289 (2.84 Å)                  | Gln300; Trp314; Trp323                                                                                  |
| Ribose              | Glu270 (2.62 Å); Asn286 (2.53 Å; 2.60 Å); Glu288 (2.63 Å; 2.63 Å)          | Gln300; Trp314                                                                                          |
| Sucrose             | Glu288 (2.78 Å); Gln300 (2.97)                                             | Glu270; Asn286; Trp314                                                                                  |
