# Supplementary material for: Potential Involvement of the South American Lungfish Intelectin-2 in Innate-Associated Immune Modulation
Source: MDPI journal article supplement (doi:10.3390/ijms25094798), 2024-04-27
Supplement: s1 [file s1]

Supplementary Material. Transcriptome Gene Sequences

>ITLN2\_TRINITY\_DN388\_c0\_g2\_i4

GGAACATCAACAACCTCCGAAAGTGCTTTTCATCTCTGTAAATTCAAACGTGGTAGTACT  
TCTAATCTGTAGGTACAAATTATATATGTGATTATCTGAAGGATGGCGATATCCAGTTTG  
CTTATGTTTCAGTGCTGTGTTGATGGTGGCAGAGACAGATTCAAACAACAAACAGTGTAA  
CCTGAGAATTCAGAAGAGTGTTTTACTTGAGAGTATTGCTGGCTGCTCTGATCACACATC  
AAATGATCAGGTTACAAACAACACACAACACCACACCCAGCAGAAGTATATGGCAAA  
AAGCTGCAAAGAGATCAAGGAAAAGTATCAAGTCAAGCAAGATGGCCTGTACTACCTA  
ACTACAGAAGATGGTGAAGTCTACCAGACATTCTGTGACATGACATCGAATGGTGGGG  
GCTGGACTCTCGTGGCCAGTGTTTCATGAAAACAACATACATGGGAAATGCACATATGG  
GGATCGCTGGACCAGTACTCAAGGAAACAGTGAGAAATATCCAGCAGGAGATCAAAA  
CTGGGTCAATCTGGCCACATTTGGTTTCAGCAAGTGGTGCAACCAGTGATGACTATAAGA  
ACCCTGGATACTTTGACATTGAAGCTGAGGACATTTCTGTCTGGCATGTCCCTAATAAC  
ACACCTCTCAAGAAATGGAACTGGATGCCATTCTGCAATACCACACTGAAAACAAGT  
TCTTGCCCAAGTATGGAGGCAACCTACAAGGGCTCTTTAAGAACTGCCTCTTATGTTT  
AATATTGGAAGCTGCCCTAATAGTAATGGTCCAGCCATACCAATTGTCTATGATTTTGG  
AAATGCTGAGAAAACAATCAACTTATATTCACCCCTCTCCAAAAATGAGTGCATTCCCTG  
GTTTTATTCAATTTTCGTGTTTTCAACTATGAGAAGGCTGCCATGGCAATTTGTTTCAGGGGT  
CAAAGTAAATCTGTGTAACACAGAGCATCACTGTATCGGAGGTGGTGGTTTTTTCCAG  
AAGGTAATCCAGCACAGTGCGGAGATTTACAGGATTTGCATGGGATGGTTATGGAAC  
TGGCCAAGGTGCTAGTGTAACCAAGAGATGCTGGAATCAGCTGTTCTCATATTTTACC  
GTTAAAGGACTTTGACTTTGGTGAATAACAGTTTCACTCAGCTCTTTTAATCTGCATTGC  
ATTATTCCTCACCAACATTTATTTTGTATTTTCATGAATACTCATTAGTGCTGTATACTTTT  
TAATTACACAATCAAAAACCAGAAAGCTGAATTTCTGTTACTTGCATGCTGTAAACAGA  
AGTTCCATCTTCCACCAATACTCCCAAAAGGAGGCACCATGGCAGTGAAGGAAATTCA  
TAGACCCTTATCAGGATAGTTATAGCATGAGAACAGGCTGCAGCATAATCAACAACAG  
GCAACAGGAAACAGCTGTTAGAACATTAGAAGGCCACAAAAGAAACAATTTATTTTAA  
CTGTAGACCTTCTGTCGATTGTGCATCTGATTTTTTAAACAGATTCAGAATTCATCGGTG  
CTGCAGTAAGGTAGTAGAGTAAAATCTAATAGCATAGGTGGGATTAGCTGCATTCATTA  
ATTTAAATGTTAGTTAAGTATGACTCAACAAATATTGTGTGTTACACAACACTGTTTCTAAC  
TTCCACACTGTTAGATCAGGTTGTGGCTTGCATGCTGTGTTATCTTGATGAAAATTAG  
AATTTTAAACAAGAGCTTTAATACCAGAACTTCTATTCACCTCTTTTTTTACTAAATTTAT  
TTTTTCAGATCTGCTTACCTGGCTTGCTTCAGTTGTTTGAAGATTCATTTTGCCCTAAAAAT  
GGTAGCATTAAACAATTCTGTTTCAGCAATAAGCTCTGTTATGTGCTTGCTTGTTTGTA  
AACTACTGTGACTTGAAAGTGCAGAGTATGGCTGTAAAAAACACTGACATCAAATTATC  
TCAATTTTTCCCATTTCTAAGTTCTTTTATGCTACAAGCAAATTCTTTGACATTTGTTATTTA  
ACCATGTTTCTTCTATAGGATATGATAAAAGCATATTACAATTATGGAATGTATATGAAT  
TCATGATTAGGACAAAATATTATGCAGATTATAAAACTGAACATACAGAAATATAACTT  
TAATGGCATTATGTATTGAAATAGCAGCATGTTAGTGAAATAAAAATGAATGAGTTTAA  
CAGTGGGTAGAGCAATAAACTA

>LGALS1\_TRINITY\_DN18437\_c0\_g1\_i1

ATTTTCAGACATGGCAGAGATAAAGCATGCTACCTTAACTGACCTGGATCTGCGTCCAGG  
CACAGAGATTGAAGTTGAAGGATTTATAAAGCCTGACGCTCAAAGCTTTTCTGTAGAAC  
TGGGAAAAAATGATGACACTGTTCTCCTGAAATTCAATCCTTGTTTTGATTACAAGGGT  
GTTAAAAAGACAACACTGTGTGCAGCGCTATAATTAATGGAAATTCTGTGCGAGAACAGA  
ACATCCAAAACCTTTCCCTTTCAGCAAGGAATGTCAACCAAGATGCTGTTCAAATTCAAT  
GGTGCCGAAGGCGTCACTATAACATTTCCAAATAAAGATAAAAATAACCTTCGCTAAC  
ACACAACCATTTGGACAATAACTTATATTACCATCCATGGTAACATCGATGTGAAATGC  
ATCAGGATTCAGGACCAGTGATGTACAATATGACATCTGCTGTATACTACATGCTACAC  
CACATTTGTCAGCTTTGTTTCTTCATAATTATGCTGATTTTTTTAATATACAGATTTGAAT

AAAGCATTTATTAACACTTGTTCTGACGGACAGATTTGTTTATAAAAATGAATCTTCATGC  
ACATCTCTGATCACAATACTGATTCTGTTTTATTACTAAATTTAGGGTCCAGATTATAGTT  
GTAGACTGAAAGGTAAAATTACTCTGTTATCTCAGATCACTGAAAATGATGTGCTGTCC  
CTTGCTTATTTTAAATATTTATTTTATCCTTCAGCCATAAGCAGTCATAATTTTTCTGCT  
GTTAGTTTATACTAGTTTGGGTTATTCTGTGACTATGTGCGCACAATAGAGTAACTATGT  
AGCTACTTGCTCCACATGTTTAACTTACGCTATTTCTTCCAAGTGTTCTGAACATAATCGT  
TGCTTGTAACATGATGTCTTGTTTACTTGTTTGTATAATCTGTAACCCAGGCTGTAACAT  
GGCTCTAGAGGTGGGTAAAGTTAGAAATGAGCAGAGGTGGATGAGGAGATGGAGACC  
TATAGATTGGAGGGCAGAAAAGGGAGGAAGAAACCAGAAGGAAGGGGCTGCAGAAA  
TATGGAGGAACTGAGAATGCCACTTAAGTACTGGGAACAGATGGTAGTACATGAGGA  
GAAAAAAGAATGGGGGCAAATAAGAGAAGAGTATGGGCTTGAAAATAGACATATACT  
GAGATACCGAGGTTTAAAAAGAGAAGAGAGTAAGACAAGAAAAGAAGAGGGACAAA  
TAAAAGCAGAAGAATGCCCAGAGTAGATAAAGGTTCTTATAGAACCAGAGGAACAG  
TGACAAAAATAATACTAAATTGATATCGAGGGCATAACCAGGGCATAATAATAGGGTAT  
AAGAAAGTGAGTGAACACATGAGACAGACATGGCAAATGAGATGGAATAGGGAGATA  
TCAATAAAACAATGGGAGGAAATATGGAAGCCCCAAGATATGCTACAAAGTCCATG  
AAATTTAGAACTTTTGCATGGAAATGCTTTCACAAGTATTTCTATACATTAGTGAGGCAT  
AAGAGGTTGTTTCCACAGACAGATGAAAGGTGGTGGAGATGTGAGACAGGACAAGTTG  
GAACATGGAAGGATATCTTTTGGGAATGTGAAAAGCTGAAGGGAATTGAGGGGGAAGT  
CAAATAAATATGGGCAAGGGCAAGTCTAAACAATAAAACATTTACAGAAATGGGAAT  
GGACATAGAGATAGACCTGACCTGGAAGGCAAATAGAGAGGTAAGAGAACTCCTGAC  
ACTTATAATAATGGTATACAAAAAGCAATTACAAAGAAATGGAAAAATAGGGAGGT  
CCCAGAGGTCACGGATCTTCATGATATCATGTGGGATATGCAAAAGATAGACTGCTGG  
GGCTCCCAAGTCCCTAAAAGGGTTAAGAAAAAACGTGGTATTTTGTGAGCATGGAGAA  
AAAGAAGATGAAAAATGACAGTTCCTTTAGTTATTCCTCACAGAAACCACTATGGGAT  
GAATGAATGAATGAATAAATGAGTAAGAGTGTACAATAGAGGGGCGAGACATACGCG  
CTCAGCCTTGACATGTAAATAGTTGGGTAGCAAGGTTTGAAATTAGCT

>LGALS9\_TRINITY\_DN2268\_c0\_g4\_i4

AATATGAATGGTACATGCTTTATTGTTTCATTTGGTCCATGAAAATGTAATTGGTGAAGT  
GAAGCTTTAGGAGGTAACCTGGACAAATGATGATTACTGCTAAAAAAAAAAAAATACATAT  
CTGAAAATTTTCAGACATGGTATGACTGGACAGGCATTTACTGTGTTTTCAACAAAAACA  
GGTAGATACAGTAAGGCTTTCATTATATAAATGATACAAAACAGATTATACAAACACT  
GAAACATGAGAGTGTGACTAAACCTGAAATATTCTGAACAGATTTACATTTTTGTATCT  
CTGCTTAGACAATAAGTTTGAACCTCCAAGTTAACTATTATCAACAATTTATTTATTTA  
TAACTTTTGTTTACTGGGAAGACGCCACTGGAATACAAGCCCATTTTCAGTGGGTGCCC  
AGGGAGAAAAGCCCCACATATACAACATTAAACAAAGACATAAAAAACAAAACATTT  
TAAGTTCATGGGTACACAATAAGCTTCAACAACCTGTTAACACACATCAGTAAATACTA  
AAAGTTTTACATTTTTTTTTAGAATAAAATTTATAGAAGTATTTAAGCAATTTATACAAA  
TGACAACGTGCCTACATTTTCTCTCACACTAACATCTGATACATTGTTTAGTAGTTAGTC  
CATAAATGGTAATGGTACTAAACTAAGACAGAACTATAGAAGCTACAAATCATGCTA  
TATGTTTCTAGAACTTATAAAAAATATTCTGAATAATGATTTTCTTTTCAAAAATACACA  
CTTGTAAGCTGGACATTCCCCTTATTTCAAGCTTCTTTATTGACTGAAGGTCAGATACT  
CGATGGTTGAAGTTAAACATGTTTCCATTTACACTGACTCTGAAACAATGATGTTTACA  
GATAATGGAGATCTGAAAACCTCTGCCCTTGAATATGGGCATTGTGCCATTAGGCAAAC  
TCCGTTCTCTGCTCCCCAAGCATTATTCAGAAAACCTATTCGAACTAAAGCATTTTCTC  
CAAATCTTACAGCCAGATGAAATGCAATGTCAGAAATTCCTCTTCAGGTCAATACGGAA  
GCTGTCAGCATGATGAGGCACTGATCCAGAAATGGCAATGTTTCTTGGTGGATACAGCC  
CCTCTGGTATGTAAACTTCATATGGAACCTGAAAATTAGCTGACTGAGCTGCAGCAGAC  
GGGTAAACCGGGAGCTACTGGTGGTGCCGCACAGTAAGTGGGGAAAGCAGAAGCAGTT  
GGTGGTGCCGCAGAGTAAGCGGGGAAAGCAGAAGCCGCCGAAACAAAAGCACCTGAA

GATGGAAGCACTTGTGAGGCCCGCATGTCCTGAAAACCTGATGACACTCAGCTGAATCTC  
TCCTGACACACCGATTGTATCCACCCTGGACAGAGGGATCCTGTGTTTATATTCTAGGA  
AATGTACCCCATTCCTGCCCACCATGAAGGAAGTAGTTTTCGCAAGAAAAAGAATTC  
AAAGCGCTGCCCAAATTTAAAGGGCATTTCATATTTCCGCTCTTCTGAACCCCATGTCTC  
ATACTGTAAAGTATTGCACACGACACAGCTCTCGCCAAAGCGTGGGTGAAGTGAAT  
GCAATATCGGAACGAGGAGTCACATTGGTTCCACACTGGAAATTCACAGCAAACCTAT  
CACAGTAGCTGTTGACCTGTCCTTGTACTGCCACTATTTTTCCATCATAAAGACCACCAT  
GAATGGCACCAGTAAAGGGAATTGGGGGACTGTAGAAAGGCGCCTGAGTCTGAAACC  
CCGACATTGTTTCGTACAGCCA

>CLEC2L\_TRINITY\_DN98733\_c0\_g1\_i2

GGATTTAAGTTTTATTTTATTTTTCTGCAGTGTCAATTTATAACCACATTTGAAAACATCCT  
TAAAAAGCAAACAGATATTGAAAAGCTTTATAGTCTTAGTCTTTATTTTTATGTCATGCTG  
TCCAGTAGAGCAAACCTGTTTTGTTAAAAAAAAGGTTGCTTCATTAGGATAGCTGTACT  
TTACCATTTTTTTTCAATCATTTTACAAATATGATATTGTGACTCCCTTGACAGAGCTGATA  
AGACAGCAAAAAGCTATACCTAAAAGTAATCAGAGGTACATTCTTTGGAGAAAGAGCA  
CTCTACTGATATATCATCATTTAGTTCTTTGGATCAGTACTGTCCAGTGTGCTCTGGCAG  
ACAAGCCTTCATCCCTTCACATATACATATTTGTAGCAATATCATCATAAACGTATATCG  
CTTGCTCTTATTGCAAGTGGTTAACTGCTTTCTTCACACAAATATAAGGAAAGAGTGCTG  
AGCAATGACGATCAAATAGCATATCAGGTTCAATAGTGATGCATTTGTGCTCAGGACTA  
ACACTTCCTCTATTGATTCTAGTATCATTACCATCAATACTGAAGAACGTATCAATCCAG  
TGAGCTTTATCTTTTACAAATTTTGCTGCAAATTCCAACATGTCATTGTTTAGATGTGTAA  
ACAATGATGCATTCTGAGAAGAACATGACTCTTCTGAGGCATTGTAGTTTTTTTCTTCTTT  
GGAAAACAGGTAGCATTGTGTTTTGTATCCTATCCAGTGTTCTGGGCACATATAGTAATT  
CTCTGTACCGTTACCATGTGCCTCTCTGAATAGTCCTCTCTGATGTTCCATCTGTGCATTA  
TTTAACTTTTGAGTATATTTATGAATAAGCAGCACTTTCCACGCAAATATCAAGGCAAG  
ACAGGTGATGCTGAGTGCAGTCATGGAGTAATAACAGAACAGCAGCTTGCCCATTCTCT  
GAGCTGTAGAACTCTGTTGTCCAATTCCACCTTTAATTTTTTCACACTTGTATCTTCGTAG  
CTTTGTCAGTGT

>CLEC2B\_TRINITY\_DN2263\_c0\_g2\_i4

AACTGTCGAACAAGTTTCGGATGATGAGAGGTTGAGAACGATATATACGTGTGGTTATT  
AAGGAAATGCAGACTTTACTTGAGGAAGCATGTTTCTGCAGTGCTTGTATGTGCAGGG  
GAGAGCAGGAAATTGGAAGGAGGACTACAACCTGTTGCTCTCATATACAGCATTAGAAA  
TGAATTGTCTCCTTCTAGTGACAGCTGTGCTTGACAGAAGGCTCCATATAAACTACAATA  
AACTTTTGGAATCGCTCCCAAAGTGCTTTGCGGGGTATTGCAAATTTCCATGGAGGT  
GTGCCTATTAAATTTTCATTGGGCTGAATTTTCATTGAATATATTGGATTGTCTTTAGAAAC  
CGTGGCCCGCGACGCAAATGGTTTTGTAAACATGATTAGAGCAAGGAGCACCGAGAACC  
AAAGAACACCACTCAGGATGTCTTCATCTGAGAAGTCTAGCAGATCACTCGCAAACCT  
AAGTTCAGATATTTCTTTCAAAACATTAGTGTTTGTGTGCTGACTGCAATACTATCAAT  
ATTCCTTTTGTAAAGCTATATTGCGCCTCACTGTGAGATGATTTATAGAAAAAGTGTTTC  
GACTACAGATAGAGCTGCAAAGGACTTGGACATCTTAAACAAAATGAAAGAGCTTTGC  
CATGAATCAAAGGCTAATGATAATGAAAATGATAGAGCTGCAAAGGACTTGGACATCT  
TAAACAAAATGAAAGAGCTTTGCCATGAATCAAAGGCTAATGATAATGAAAATGATAG  
AGCTGCAAAGGACTTGGACATCTTAAACAAAATGAAAGAGCTTTGCCATGAATCAAAG  
GCTAATGATAATGAAAATGAAGTTTCTTGTAAGTTGTGTCCTCATGGATGGATTGGAGA  
TCCAAAAAACTGCTATTTCTTCTCAACTATAGAAAAAGATTTCAAGAGCAGTGCAGAGT  
GGTGTCTTCAAGACATGCATCCCTTGTGCTGATTAAAGATAAGGAGAACTGAACTTC  
ATAAAGAAGCTGGGCCTACAGCAATACATACTATATTGGACTGAAGCGAAATGATATGG  
GACAATGGATGTGGGCTGACAATACATTCCTTGATAAAACGAGATTCATACTGGAAAA  
CACTACTGAACTTAACTGTGTTTTTATGGAACAAGATAAAATTCATCCAACCTTCTGCAA

CTCATATCATCGATGGATATGTGAAAAACAAGTTACAAGAATATGGTGACCAAATAAT  
GTAAAAAGTGCAAAAAAAATTCTGGCTCTGTTTTTTTTTTTTTTTTTTTATTG

>CLEC4E-A\_TRINITY\_DN90481\_c0\_g2\_i3

CAGTAGGAAGAGACATATCTCAACACGTATCACCCAAGTAAGATTTGACAAGTGTTTC  
ACTTTTTATTTCTTATCAGGGGACAGCAGACTATTTAAAAAAAAGTCATATTGCCCTCTT  
CACACAAAATACCCTATTGATGCTTTCTCACAAATCCAGTTATGTTTTATTGAGCATTTA  
ATGTCAAGCCATGTTCCGTTTACTTGCAAAACAACACAGTCATCCACATTTGACACTGC  
ATCCTGGTTGTTAGGTCTGCCTTGTGCCCAGAAGTTGTCTGTGGCGGAAAAATCAGTGCC  
ATCCACCCACTGAAATTTGCCTTCTACTGTCTGGTCACTAAGTCCAATGAAGTATGTTTT  
ACTTGCAAGGGAAGTTCTTCAAAAAATCCCTGTTCTGCTCCATCATTGATGATAACAAGCT  
CAGATTTTCATAGATATGCATCTCTTATAAGCAGTATTCCAGTTTTTCAGTCTCTGTAGAGA  
AGTAGTAACATTTTTCTTTATATTGCTTCCATGGGCTCGAGCAGGGAGAACATAAAAAAT  
CCACTTTTATTGGCAGATGTCTTCTTGACAATGCATTGGAGAGGATTTTGCTGTCACTC  
TGCAGGTCTTTGATGCTTTTGGCTTGACCATCATTTTTATTGTGGAGTTCAGAAATTTGGG  
ATGACATCTTCTCCTCCAACTGTATCATTTTCATCAATCAGTGCATCATATTTGCGGTATC  
CCACTGTGAAGAATGCTATAATCAGCACAAAGCAGATCATTAAAAAAATGACTAGTAT  
GATAAGGAGCTTTGCTGGCACCCTCTCTTCTCGCTTTCTTCATAGATAAAAAATGCTGA  
GTTGTCTGGACTTCCCTCCATCTTGTTTTAGTGGGTACTTGAAGTATCTGGCTTTGGAACA  
GGAACATCTAAACACAAATGTCATTCTTTCTTTCTTTCTTTCTCCAGTGGTATCCTTA  
TTGGGGCGTTCATGTAAACGTGTTCCATCTCCATG

>CLEC4E-B\_TRINITY\_DN68583\_c1\_g1\_i2

GTGTTTCAGCAATACACTGTGATGCAGAAGGAAATGGCACAATACTTGCAAAGTTTTTAG  
AACACTTGTCCCTTTTTCATTAACATTTAAATACTAAAGAGCAGACATGATTTATGAAGA  
GCTTAATCTTCCAAGTACAGGACACTTACAATACAATCGAGCAGCTTGAGACTGAGAGA  
CAAGGGAAAGAAATGACACCAGGACTGAAGAAAGCTCCGGCAGTACAAGATGATAAA  
GTGAAGCACAACAATGGATGCACAAAGATGCTAATTACACTGGCTGTCACAGTGATCA  
CCCTGCTGATAATAATTATAATCTTAATTATTCTGAATCTACAGATGTCAGAACAGATA  
ATTCAGTACAAGAGGTCATCTGTGTTCCCAAAAATTACAATAATGACAAATGGAGGGA  
GTTGTTTCTTATCATGTCCAGATGAATGGCTAGAGTTCAAACAGTCGTGCTACTTCTTTTC  
AAAGGACAGCTTCAATTGGAATATGAGCAGATATGCCTGCATGGCTAAGAAAGCTGAT  
CTGGTGGTGATTACCAGTAAAGAAGAACAGGACTTTATAAACCATCACTATATTGACAT  
GGCCTGGATTGGTCTAACAGATAATGAGCAGGAAGACATTTGGAATGGGTGATGGC  
ACACACTATGACAACAAAACCAGCTTTTGGTGTCTGGAGAGCCTAATAATGCACTGGT  
GCACAATACTGAAGGTGAGGATTGTGCCATGCTGTGGAATACTACATCATGTCACTTAG  
GCTGGAATGATTAACTTGCCAAAGAGACTTGAAGAGAATTTGTGAAAAACAACCTCTG  
CACAGTGCTTATGTAAACAGTGGCCTATGCAATGACTTTGACCAGCAGAAAATGTGAG  
AAAGTATGTATGCCGGTGAAATATTTGGCAGTAGCTGCCATTTTATTTACACAACCTCAT  
TAACAACATTAACATCAATAAAATTTGTTACCACAAATAGTTAGTGTCTGGCCTGTAAT  
GTTACTTTTATTCAGTCTTGACCCACTTTTAGTCTGTAATCAGTGACATGCAAAAAGTTT  
TTAGACAGTATGCTATCAGTTTATTTTACTGGCATTTATCCTGGTTGTATTTCCTCTACAG  
ATTCTCAGAGTTGTTATTGTACTTATGATATACAGCACTTTTGGCTTAGTTTAGTTACTGT  
TTTTTTTTTTTTT

>CLEC4E-C\_TRINITY\_DN46240\_c0\_g2\_i1

GAATGGAAGATGAGGTTTACAGGATTTTTATAATCTCTTCCACAATCAATCATACTTTTG  
CTTTAAAAGGCCAAATGTACTTATTAGGTTAACAGTTCAAGAGCTAATATTGTTGAAGTT  
GTGTTGCAAAATAATGATATGACAGCTTCTAAGTAACTGCAGTGAATCAAAATAACTTT  
TTCAACAAATTGCCATTGTACCATAATAAAATGCATACATTTTAAATAACAGCAGAGA  
TAATGATAAACTCAAACAAAAAAGTTCAGTACATAGTTTTCTTCAAACCTTGTTTCT

GTGACAACCATTTTCTTCATGCTGACATCCACAAAAGTAACTATATAGGAACTATGTGA  
ACCACTAACTGAAATAATGAAATAATATGTTACTACTGAAACATTAGGAGGATGGTTCT  
GTATTTGTCTTATCAGTCTGACTTTGTAAAAGTTAAACTATTTAAATAAACAGTGTTTTA  
GCACATGTTGTTGTTTGCTATATAGTCAGCCAAATCAACAATGAAATGAAGCAGATTTA  
TAAAGAGTTGCATTTGATCTGTTTTTCACAAATAAAATTGAAGGACCGTTGGCAGTTTTC  
ATCATTCCACTCCAAGTACAAGGAGGCCTAGTCCAGAGGGCTGCACAGTCTTCACCCC  
TGTGATTGTCACCCCTTGCATCATTAGGTTACCTTTGCACCAAAATCCAGTTGAAATGT  
TGTGTGGTGTTCATCTATCCAATGCCATGTGCCTTCCACACCTTCATCAGTTAAGCCAA  
TCCAGTAATTGTTTCTACACTTATTTTTTAAGAAATCCTGCTCTTCCTTGTTGTTGATCACT  
ACTAAATCGGCACCCATTTGCTGACAGTATTGTCTGCTGCCGCTCCAAGAGTCAGTGGA  
AGTGGAGAAGAAATACAGGGACCTCTGAATAAGTTCCAGTTTTCAAACAAGACTGAG  
TCAAGCACACAAAGATGTCCAATTTCCGAGGGTATAAAGTATCCACTTTTTAATTCAGG  
CAGCGCTTTTGATATTGGGCTGTAGTTACTAACCATCTCTTGCATTTTCTCTGTTTCTTGTT  
TAAGAAGGTGTGACATTTTGTTATAGTTCACGCTTAGAAGAATAGGGGATGCAAGCAG  
ACATGTTGTAATGAACAGCAGAACAATTATCAAAGACCATAGTATGGGTTTTCTCATTTA  
ATTTATTCCATAGTGTCTGCCCTGCATGAGAGTTTAATCCAAATACATTCTGTGCAGTGG  
CTTTATCCATCTCAGGTTTCAAGAAATAGCTGCATGGTCATTTTCAGATTCAAAAAGCAAA  
GAATTATATCGAGCATCATATTCCATTGCTGCAAGTTCTGCTGCTTATTTCTCAATAA  
CTCAGTGTAGTGA

>CLEC4E-D\_TRINITY\_DN23661\_c0\_g1\_i1

AAAAATATGATTTGGATGTTATTATTTCAACAGGTTTATTTTGTATTTACACAAAGTTCTT  
CTTAATTTTTATATACAGTTTGCTAGGCTACCCAAAACAGTTCTGCATGAAGAACCTAAT  
TCCCCATTTTAATTTCTGTTGCATTCACTTTAATGTTATTCTGCATTATAAAAACTCTAT  
AGCAAAGTAATTCCAAAAATAGGAAAAAGAGGAAAATGTGCACAGGGAACCAATGTG  
CAGTTGGAGGGGCTCGGTATAATGGTGAAATTGCTTTCTTTTCAAATACCATTGACTTAC  
AACAAATAAAATTAACAATATTTACAGATATCATCTATTGCCACATTAGCATGAATC  
ACGTAGTTTTAGGTATGCCTATGGATTAGAAATTATGTCATAAAGTCATGGTCAGCAAG  
AGTTTCTTCCAGTGAGATTAAGTCTTGTTTAGTTTCTGACTGGCAAGTTTTAGCCAACTG  
ATGATAGTCATGTCCACATTAGCATGTCTGCAGGTCAACAGCTTGAGCCCCACTCCTGT  
CTGAAATGATTCCTTGCACTCAGCAAGGATGGTAACCAGCAGTCATAACTCAAATGGTC  
ACACACTGATGATCGTCCCTTTTTTTTTCACAGATGTATGAATAATTTAAATGACATGACA  
AGTCATATGTGATAAGTCCAGAAATTGAAGAAATGATTATTGCAGCACAATCCTCTCCA  
TTAGAATCGTGACGCTGGCTATTATCAGGCTGTCCAACATCCCATGCCACTTTTCTTTTG  
CTAGTATCTTTGCCATCGACCCAGACCCATTACCTTCTTTTTCGATATCTGACAATCCA  
ATCCAATACTTTTCACTTTTATTGCAAACCAGCTAAGAAATGCCTTCTCCAGGTCATTG  
TCTATGACAACATAATCAGCACTCTTATTCTTACAGTCCTCCCTGCCTTGCTCCCAGCTT  
CGTTTGCTTGCAAGTTGAGAAGAAGTAGCAGCTAGTACTTAATGAATCTCTATCACTTGG  
ATGGAATGCTGTCCATCCAGGTGGGCAGATCTGACATCTGGAAATTGCACCACGTTGCA  
CACAAAATGAATCTTTCAATTCAGAAAGTGCCTTAGAAAGAGATTGCTTGTGAGATCTC  
AGCTGGAATATTTCTACATCTTTCTCATTCCGAGGTCTAGAAATTTCACTGCAGTTGAAA  
GGAATCTGTTTGACTTTTGATGCTTCATTCAACTCTGCAGAAACAAAGCTGAAATTTTCT  
GAAACCTCCCTGTGTTGGGCAGTTAATTTTTTCATATTGAGCCGAGAGTAATTCTGCTTTC  
TCTGCCTGATGAGAATGTTGCTTTGATGCATTGTTATACATCGTCGCAATGGCTACAATC  
CCAATCAGCAGGATGCCGCAGAGAAGGAGAAAGGCTGTGACAATGAATCTGGTTCGCC  
AGGATATCTTTGATGTGTCCGAATCAAAACCAAAAATGCCTGTTTTACCTTCCGCTGCTG  
GCATTTGTATAGGTGTGTAGATGTGCTGTGCTTTGGTGGATTCAAGTTGCTGTAGGATT  
CTTCATTAACCTGGTTGCAGTCCCTCGTATATGTGCTCATTTGCCATTGTTGCTTTCTCTGG  
CTCTTTCTTTCTATCTCCTTCTTCCATCGGGACTTCCATCCCCTCAGGTCTCCCAAACCCA  
TCCTACCAACCTTGCTTGGGCTGTATGAGACATGGGGATCCCGTGGTCAGGAGTCTGT  
GCATCAGCCTGGTGGGTGCATGTGTGTGAGCTCCATCCCATCATGG

>CLEC4E-E\_TRINITY\_DN383\_c0\_g1\_i7

CCTTATTCCCTAACTACTTAGTCGCAGATATAAAACTTAAAAGACATTAGCAAAAAGTA  
GCTTCAAAGGCAGGTGACAGAACTTACAGTAAGATTTATTCATCAAATTTATTTTTAAGT  
ATTAGCTAATTTTTGCATTTGATGAACATTATGGAACAGGAGAAGACATACCAGGAGCT  
TCAGTTTGCAAATGAAAATATTTACTCGGAACCTTGATCAACAACAACTAAGAACTA  
GGAGCAGAAAAGACAGCTCCAGAAACACAAAAATATGTGGCTAAGTATTGCAAACAA  
CCAAGAAAATTGTTAATCACCTCCATTATCACAGTGTTTCATCCTGCTGGCAGTAATCAT  
AGCTGTGATTATTTGTATTTACCAACTTTTTCCGGTGCAGCCCCAGCCCAGCACATCTGT  
CGCCTATGGCCCCATGACTGGAAGTCCCCTTGATGAACATTTTAAATGGCATAACAGCAA  
ATACTGGCAGAGTTAGAGCACACACCAGCCAGCAACAGCCAGCTACAGGCATTTCTTC  
AACTTGTCTTTTAGAGGATGCAAAGATGTTTCAAAGAGCTGTTATTACTTCTCAAACA  
CAAGTTTAGAATGGAATGGCAGTAAGAAATGGTGTGAAGACAAGAAAGCTCATTTAGT  
AATAATCAAAAAGTGAAGAAGAGCAGAAATTCCTAAAAGACGAAGTTACTAATTTTAGA  
AACACCTTTATACAAAAACCTACAGGTCAATTTTTCTGGATTGGACTTACAGATAAATTA  
AAGGAAGGAGAGTGCGCTGGGTAGATGGCACTATCTGTGACTGCAACAATACTAACA  
AAAATAAAAGATACTGGAGGGAAAAGGAGCCAGACAACCTGGAATAATTTAGAGCACT  
GTGCTGCACCTTGCTGAGAATGGTGACTGGATGGATGGGAAATGTAAGTGGACTCTCAGG  
TGGATTTGTAAGATGGATGCTACGATTTTCTCTAGCTAATCAATTTTCTCAATGACAGTT  
GTTTAAATGTGACACTGATGTTTGATCTAAACAACCATTGTAACAGTCTTGAACATGTTA  
ATCATTCAATGATTATTTAATTATTATTTGGTTTGTTCATGAAAGACCCAAGTAATATTG  
AGCACATGGACAATAATTCTGCTGTTGATGACTTTCTCCATTATTTTCATGTATATGTTTAG  
TGTTATATGCCTATATTCTAATCTCTAATGGATTTCATATTAAAAGA

>CLEC4E-F\_TRINITY\_DN9366\_c0\_g1\_i9

TAACTTTATTTGCAACTATTGTTTTTCAAGGCAATGATTTTTTTTTTTATTTTGACATCCAC  
AAAAATAACCATAAATGAACGATGTGTACCATTAACTGAAATACCAAATGTAGTACAT  
TATGTTGAATTAGTAGTAAACCGTTAAGAAAAAAGATAAAGATGCCTTATTTGTCTTA  
CCAAGCTGACTGTGTAGAAGTCAAACACTTTATAAAGGACAGTGCCAACATGTTTTGCA  
TTATTATCCCTTACTTAGGAAAATCACAAAGAAATTAAGTGAATTTATGACAAGCTACA  
TCTGGTTGGTTTTTACAAATAAAATGAAACAAGGACTGGCAGTCTTCATCGTTCCATTT  
TGACTGACAAGAATCCACATGATCGCACAGTTTTTCACTATTGGGATTGTTACCCCATG  
CATTATTAGGTTCACTTCTGCACCAATGTCCAGATGATTTACTTTGAATTGTTCCATCTAC  
CCAACGCCACACACCTTCTCAATTTTCATCAGTCAGTCCAATCCAGTAATCATTTTGGTT  
GTTTCTTATAAAGAAAGTCTGTTCTTCAGCATTTGTGATCACCCTAATTCTGATGACAG  
ATCTTGGCACATTCTCCTGGCAGTAGCCCAAGTTACAGACTTTTTGTAGTAGAAGTAAC  
AGCTCAGCCTAAATTGCTTCCAGTCTGAAGGGCAAGGTTCAATCTGCTTTCTTTTAGAGA  
GTTCTGTGAATTCAGTATTTTTTGTCTGATCTGCCTTTGAAGGTTTTCCGTTTGCCTAAC  
ATGCTTTGAAAGCTGTGATTCAATAAGAGAAGGTCCTGGTTTGCTTGTCTAGTTGTTTT  
GACTTCTGTAAATATAGAATAGTCATGAAGATGCCAATTGCCACCAGGGATAAAATGA  
GCATCAGGATGAATAACACCTTACAGTTCCACTTTGTTTTCTTCTTTGTGCTGTTAGGTTT  
CTGCATGCCTTCTTTGGCACTTCGTAAAATTTCTGCTTGGGGATTGTTAGTTTGTTCATA  
TTAATTCTAGAATAAATGTTTTCATTTCTACATTGAAGCTCCTCATATGTTGTATTTTTTTC  
CATGATCTTCAAAAATTTTAGAAACACCTGAACTGACAGAGGAGCAGCGAAAGGCTG  
TGTACCAGCATTTACAATGAAGAGGGAACCTGTGAGGCACGTTCCCCAGTAGAACAAA  
TAAGTAGTGTTAAATCCAGAAGAATACGTAAAACAACTAGTTCCTTAAAGAGTTCGTC  
TTTTATTAAACAAATGCTGATTAAAAAAGGTAGTTTAGCAC

>CLEC4E-G\_TRINITY\_DN383\_c0\_g1\_i3

TCAACGAAAGGTGACAGCACTAATAACAAGACTTATTTATCAAATTTATTTTCAAGTGG  
TGGTAGTTTGTGTCATCACTGAGCATCATGGAATACGAGAAGACATACCAGGAGCTTAA

GGTTGCAACTGAAGACACTTACTGTGAACTCAATCAACAACAAACCAAGAACTCAGA  
GCACAAAAGACAGCTCCAGAAACACAAAAATATGTGGCTAAGTATTGCAAACAACCA  
AGAAAATTGTTAATCACCTCCATTATCACAGTGTTTCATCCTGCTGGCAGTAATCATAGCT  
GTGATTATTTGCAGTAAGATAATTCCTGAACCTGCTGTTTTAAAAGGCAATTCTTCAACT  
TGTCTTTTAGATCATGCAAAGACGTTTTCAAAACAGCTGTTATTACTTCTCAAACAGAAAT  
TTAGAATGGAACGACAGTAAGAAATGGTGTGAAAACAGAAAAGCTCATTAGTAATAA  
TCAAAAGTGAAGAAGAGCAGAAATTCCTAAAAGACGAAGTTACTAATTATGGAAACA  
CCTTTATACGAAAACCTAAAGGTCATTTTTTCTGGATTGGACTTACAGATGAAGTAAAG  
GAAGGAGAGTGGCGCTGGATAGATGGCACTAACTGTGACTGCAATAGTAATAACAAAA  
ATAAGGGATACTGGAGGGAAAATGAGCCAGACAACCTGGAATAATTTAGAGCACTGTGC  
TGCACTTGCTGAGAATGGTGAAGTGGATGGATGGGAAATGTAAGTGGACTCTCAGGTGG  
ATTTGTAAGATGGATGCTACGATTTTCTCTAGCTAATCAATTTTCTCAATGACAGTTGTTT  
AAATGTGACACTGATGTTTGATCTAAACAACCATTGTAACAGTCTTGAACATGTTAATC  
ATCAATGATTATTTAATTATTATTTGGTTTGTTTCATGAAAGACCCAAGTAATATTGAGC  
ACATGGACAATAATTCTGCTGTTGATGACTTTCTCCATTATTTTCATGTATATGTTTAGTGT  
TATATGCCTATATTCTAATCTCTAATGGATTCATATTTAAAAGA

>CLEC4M-A\_TRINITY\_DN1982\_c0\_g1\_i1

ATGCATGATAGCCATGCTTGGATATAGTTTCAGTTCAGTGAGGAAAAGGTTTCATTCA  
TATTTACAAATACCTGGTTTACAAAATCTTCTTACATTTCTGCTTATACCAATGGTAATA  
ATAATAATACTAGCCAAATCAGGGACATGAAAGCATTCTGTAGGTCTTTGGTCTTCCC  
AATGAATGCAAACCATTAATAAGAGTTATACAGGACAAAATGAAAATAGCACGTGAA  
AGAAATGTTTATTTTCCCACTCAGCCTTTCTTTTCAAAATATAAAAGGAATTAAGTTTT  
TGTATTACTCTTAGTGAAAAAATAGTTTACTGTTTGACATTTAACATAATGCTCCATGGC  
AATGCCTAGCCTTCACAGTCGGGGTCTGAGACTGAAGTCTTGCAGCTCGCATTATATAA  
ATAGCCTTTACAAAGAGCAAACAGAAGTCGGTGCCTCACAAATAAAGCGTAATACGCT  
GGAACAGCGAGAATCACTCCATCTACCTTCAGATGTCATTAAGGCACAGTCTTCGTTAT  
ACCAGTCATCAGGCTCACCGCTAACCCAAAATTGTTTTCTGTTGTAGTTGCATTCACAAA  
AAGTGCCATCTACCCATTTCCACGTATCCTCTTTTTCTGTTATCTGTAAGCCCAATCCAGT  
ACCACAGTTCACGTTTATCTGCGTTGCTTATTTAACTCTTTTGCTCTCTTATACAAAAA  
GTCCTGCTCCTCAGTACTTTTGATCACCCTAAATCCGATGACCAGTCTTTACATGTACT  
CCTTGAATTTGTCCAGCTTTCCCTAGACGCTGAGAAGTAGTAACAACCTTGTTTGAATAT  
CTTCCAGCTTGCAGGGCAACATTCAACCTCCCTTCCTTGGTTTGATGATGCAGCAATTTT  
GTTCAACATATTAGTTTATTTTCTATTTCTTATATTTCTCTTCTGCTGTTTCTTGCTT  
ATCCATTTGGTGTGATTGTGATGTTAATTTTTTTTTCAAGCTGAAACAGAAGGGCTTC  
CTTACTTCTTTGGAGTTCTGTAATATTATCTTCTGCTCATGGACCTTCATCTGTAGGTCT  
GTCTGATTAAATGCCAAGATGGTGATTTTCTCTTCTGCTTCCTTAAATTTACTGTAAACA  
CTGAAATTCAATGACTGCAACTCGTGATTTGCTGGCCCATATTGTTTTATTGGCTGTAAA  
TGTAACACAGCCACAGTTATGACCACTGTGAGTAGGACGATAATGACAAATACCATAA  
AGAACGGCATCACTCTGCTTGTGAGTGTTTTCTTGTTTACATCCTTAAATTTCTGCGATCC  
TTGCTTGTTTGTCTCTAGCTGTGTGTTCACAACTGGAGTGCCATGTCGATTGAAGCTC  
ACTTCAGCATATGTTATTTCTGCTTGCATGTTGGTTATTCCAAGTCTTTTTGTTTTACTGC  
TTTAATTTTATTTTGCCTTTCTTTTCAAGCAAGTTCTATGTTTCCATATACTGACAGGTTT  
TAGATGACTCTCTGTGTTTGTGATCTCTCTTTTGCTTATTTCCCTTTTGCTGTCTCCT  
GCTTACTGTCTATATTTTCTCAAGTTCTTACTCATGTTTCCTGAACTTTTTTTTTAATCTAT  
TTGCTAAATGTTATCTCACCCACCTTCCTTCCATCCGTCTCTCTCTCTCTTGGCTTC

>CLEC4M-B\_TRINITY\_DN1982\_c0\_g1\_i4

ATGCATGATAGCCATGCTTGGATATAGTTTCAGTTCAGTGAGGAAAAGGTTTCATTCA  
TATTTACAAATACCTGGTTTACAAAATCTTCTTACATTTCTGCTTATACCAATGGTAATA  
ATAATACTAGCCAAATCAGGGACATGAAAGCATTCTGTAGGTCTTTGGTCTTCCCAAT

GAATGCAAACCATTAATAAGAGTTATACAGGACAAAATGAAAATAGCACGTGAAAGA  
AATGTTTATTTTCCCACTCAGCCTTTCTTTTCAAAATATAAAAGGAATTAAGTTTTGTGTA  
TTACTCTTAGTGAAAAAATAGTTTACTGTTTGACATTTAACATAATGCTCCATGGCAATG  
CCTAGCCTTCACAGTCGGGGTCTGAGACTGAAGTCTTTGCAGCTCGCATTTATAAATAG  
CCTTTACAAAGAGCAAACAGAAAGTCGGTGCCTCACAAATAAAGCGTAATACGCTGGAA  
CAGCGAGAATCACTCCATCTACCTTCAGATGTCATTAAGGCACAGTCTTCGTTATACCA  
GTTATCAGGCTCACCCTGACCCAATATTGTTTTCTGTTGTAGTTGCATTACAAAAAGT  
GCCATCTACCCATTTCCACGTATCCTCTTTTTCTGTTATCTGTAAGCCCAATCCAGTACCA  
CAGTTCACGTTTCATATCTGGGTTGCTTATTTAACTCTTTTGCTCTCTTATACAAAAAGTCC  
TGCTCCTCAGTACTTTTGATCACCCTAAATCCGATGACCAGTCTTTACATGTACTCCTT  
GAATTTGTCCAGCTTTCCCTAGACGCTGAGAAGTAGTAACAACCTTTGTTTGAATATCTTC  
CAGCTTGCAGGGCAACATTCAACCTCCCTTCGTAAAACAGCCACAGTTATGACCCTGT  
GAGTAGGACGATAATGACAAATACCATAAAGAACGGCATCACTCTGCTTGTCAAGTGTTC  
TCTTGTTTACATCCTTAAATTTCTGCGATCCTTGCTTGTGTTTCTCTAGCTGTGTGTTT  
ACAACTGGAGTGCCATGTCGATTGAAGCTCACTTCAGCATATGTTATTTCTGCTTGCATG  
TTGTTTATTCCAAGTTCTTTTTGTTTTACTGCTTAAATTTTATTTTGCCTTTCCTTCAAAGC  
AAGTTCTATGTTTCCATATACTGACAGGTTTATAGTACTCTCTGTGTTTGTGTGATCTC  
TTCTTTTGTCTTATTTCCCTTTTGCTGTCTCCTGCTTACTGTCTATATTTTCTCAAGTTCTT  
ACTCATGTTTCTGAACCTTTTTTTTTTAATCTATTTGCTAAATGTTATCTCACCCACCTTCC  
TTCCATCCGTCTCTCTCTCTCTTGTTC

>CLEC19A-A\_TRINITY\_DN1706\_c0\_g2\_i2

TATTAATATCTTATTATCAAAAATTACAAAGTATATTTAGCACTTCAAATCATCAAATA  
CAGAATGTAGGAATAAACATTTAAGAAAGAGAAATGCAGTACTAATAAAACAAGTAA  
AATCCAACAGTGAAGCCAATAAGAAACAACAGGTATATTTGATTTTGTATAAAACTGT  
AAATTTTTTAAATCATCTGCTGAAAACATTTCTTGCGATGTCCATGTAAGACTTCTCCT  
TCATATTAGAATATTGGTGCGTATACAGAGCATCTTCGAAGGTCATATTTGCAGACAAA  
AGGGAAAGACCATCTGCTACTGTAGTCATTCCAGGTAATAGTACCATTCTGAAATACC  
ATGACCCAACATAATCTTCATTGCCAAGATTGTCTGGTTGGGATTTGCCAAAACGTAGG  
AAGTTCACTGGACTTCCATCAGTCCACATAAAAACACCCTCTACAAAAGTGTCAATGTA  
TCCAATCCAGTAAGCCTGTCTTTTATGTAATCATTGGGTCTACCCATTAGTTCATAAAT  
GTAGTTATTTTCTTCAAGACTGTGGATGGATGCCAAATGAGCTCCGTAGTAGTTTCTTGT  
GCAGTAGGCCTCAGCATTAAACCATGTCAATTTTATTTGTATGGGACGAAAGCATGAAT  
TCTTGTACTGGAACCATCCAAATGAGCAGTCCCCCTGATAACAGAGACAGCCATCTGCA  
GTGTCACCACCAGGAATAAAGGCAGCCAGGAGTACAGACATCAGTATCAGGTAATTCA  
TCTTTACAATGAATACGTCAAGTATGATGAACTTTTTTGGCAA

>CLEC19A-B\_TRINITY\_DN1706\_c0\_g1\_i1

TTATAACTTTGCCAAAAAAGTTCATCATACTTGACGTATTCATTGTAAAGATGAATTACC  
TGATACTGATGTCTGTACTCCTGGCTGCCTTTATTCTGTTGGTGACACTGCAGATGGCT  
GTCTCTGTTATCAGGGGGACTGCTCATTGTTGGATGGTTCAGTACAAGAATTCATGCTTTC  
GTCCCATACAAATAAAAATGACATGGGTAAATGCTGAGGCCTACTGCCAAAGAACTA  
CTACGGAGCTCATTTGGCATCCATCCACAGTCTTGAAGAAAATAACTACATTTATGAAC  
TAATGGGTAGACCCAATGATTACATAAAAGGACAGGCTTACTGGATTGGATTACATGA  
CACTTTTGTAGAGGGTGTTTTTATGTGGACTGATGGAAGTCCAGTGAACCTCCTACGTTT  
TGGCAAATCCCAACCAGACAATCTTGGCAATGAAGATTATGTTGGGTCAATGGTATTTC  
AGAATGGTACTATTACCTGGAATGACTACAATAGCATATGGTCTTTCCCTTTTGTCTGCA  
AATATGACCTTCGAAGATGCTATGTCTACAGACCAATATTCTAATATGAAAGAGAAGTC  
TTACATGGACATCGCAAGAAATGTTTTTCAAGTAGATGATTTGAAAAAATTACAGCTTTA  
TACAAAATCAAGTATACCTGTTGTTTCTTATTACATGTGATTTTATGGTTGGGTACAACC

TTTTTATTATTACTGCATTTCTCTTTCTTATATGTTTATCCCTACATTCTGCATTTGATGATT  
TGAAGCTTTACATATGTACTGTAATTTTTTGATGAAAG

>CLEC19A-C\_TRINITY\_DN14306\_c0\_g2\_i2

AAAATATTGCACACCATTGTGTTTCATTAGAAAGATGAATTACCTGATACTGATGTCAGC  
TATCCTGGTCATCTTTATTCTCAGGGTGACATGCAAATCAACCATTGCCTCTGTGTTCCG  
TGGGATCTGCCCATATGGATGGTACCAGTACACAGATAATTGCTACAAAGTTATAACTA  
CAAAAATGAGTTGGGTGAATGCTGAGGCCTTCTGCCAGAGTAGCTACCTTGGGGGCTCAT  
TTGGCATCCATCCACAGTGCTGAAGAAAATGATTACATTTTCACACTGACTGGGAACCT  
ATCTAATTACCAAACAGGAAATGCATACTGGATTGGAGCCCATGACACTATTGTAGAA  
GGCACCTACATGTGGACAGATGGAAGTGTGACAGACTACTTGCATTTTGGAACTGGTCA  
GCCAGATAACCTTGGCAATGAAGATTATATTGGATCGTGGCATTTTCAAATAATGCTA  
TTACCTGGAATGACTACCCAGAATCTTTTCCCTTTTGTCTGCAGGATCAGCCTAA  
ATAGATGCTGTCGTTCTTGAATGAAGAGTTGCAGACTGGCAGCCACGTATGACAAGTCT  
CCTGAGAACATCACAATGTTATGGCTCCCATCCAAGGAATTATATAATTTCTTTTCAA  
ATTATTTGCATCTATTGTTTGTACGATTATCCTATTCTTTATTAAAGGTGTTTTTTTTGGT  
ACTATTCAATTTTATGACAATGGCCTGCTGAAATGAAATCCACTAGCTGTATCACTTCA  
ACAGACATTTATTACAGGTATATGAGTCAATGAACTCCTCTGGCCATCTTTCATTGGTAT  
GCATTTTGTGAGTCTTCAAATAATAAAAAGGAATTTGAAGCTCAACCCTCAATAATAC  
CCTCTAAATACAGATTTTTTTTAACTCAGAAAGTATAGTCAGTGTGAGTGAGCAAAGG  
AGTTAACAGGCTTGTGCATTTGATTAAATGTCTACCAAATCAAACCTGTCAGTAGATGT  
AAATGTAACATCCGCTTAAGAATTGCAGAACCATATTTTCTTTTCTGCTCATGTTGTATT  
GCTATTTTCTGTCAGGTATGTATGATCTGCTCTGATTGCATTGTGGAGGTTCTAGGCATT  
CATTCTATACTGTCATTATTGATATAACGTTGTCATTTGGGCTAAGTTGCTGAACAAATG  
GTGTATGCTACAGGTCTTAATAATAATAACAATTCA

>CLEC16A-A\_TRINITY\_DN2288\_c0\_g1\_i1

GATTAGCGATGGCTGAAATTTTGGATATGTGGGAATGGTAATGTCACCTATTAAAGGAA  
GATTTGGGTAATTCGAACGTGGTTGTTGGTTTTCAAATGGGTAACGGAGACTAAAATC  
CATTACAGGATGTTTGGCCGTTCTAGAAGCTGGATGGTTGGCGGTCCAGGAAGGTCTTCA  
AAGAGCATTCACTCTTTGGACCACTTAAAAAATATGCATCACCTCTTAATAAAAAACAC  
TACTGTCACTGATCACAACCGTGACCTGCTAGTAGAAACCATCCGTTCTATCACTGAAA  
TTCTCATTTGGGGTGACCAGAATGACAGCTCAGTGTTTGATTTCTTTTGGAGAAAAATA  
TGTTTGCCTTCTTCTTGAATATTCTTCGGCAGAAATCTGGGCGCTATGTCTGTGTGCAGCT  
GCTTCAGACCCTGAATATTTTGTGTTGAGAACATCAGCCACGAAACATCCCTTTATTACTT  
ACTGTCCAACAACCATGTGAATTCAATTATCGTTCAAAAGTTTGACTTCTCTGATGAGGA  
GATTATGGCATACTACATATCATTCCCTGAAGACACTGTCATTGAAGCTCAACAACCATA  
CAGTACACTTTTTTTACAATGAGCACACAAATGATTTTGCATTGTATACAGAGGCAATC  
AAATTTTTTAATCATCCAGAAAGCATGGTCAGAAATTGCTGTCAGGACCATCACTCTTAA  
TGTTTATAAAGTGAACAACCAGCATATGCTACATTATATTAGAGACAAAACCTGCTGCCC  
CCTATTTCTCCAATCTGGTCTGGTTTCATTGGGAGCCATGTGATAGAACTGGACAACCTGTG  
TCCAGACTGATGAAGAACACGCAAAACAAGAGCAAGCTGAGTGACCTTGTGTCAGAGCA  
CCTCGACCACTTGCATTACCTAAATGACATTCTGATTATCAACTGTGAATTTCTAAATGA  
TGTGCTTACAGATCACCTGCTGAACAGACTGTTCCCTGCTTTGTATGTCTACTCCTTAGT  
AACTCATGAAAAGTGTGGAGAGCTTCCAAAAATCAGCGCGCAGGTGTCACCTCTATCTC  
CTTTCACAGGTCTTTCTGATCATACACTACTCACCTTTGGTGAACCTCCTTGGCTGATGTTA  
TTTTGAACGGTGACCTTTCTGTGTTTTCTGCACAGACAGAGCAAGATGTACAGAAGAGC  
ATGGCAAAGTCCAATATACGATGCTTCACAAAGCCTGCAGAGAGTCTTGAGAAATCAC  
TTGAGATCAGTAAGCAGAGGGGGAGAAAAAAAGCACAGAAAAGGCCAAATTATAAG  
AATGTGGGTGAGGAGGAGGAAGAGGAAAAACCTCCAGATGAAACTCTGGAAGATCCT  
GACAAGGCAAAAGGTACAGACGGAGCTTCAAAAAGCAACAGGACTACTTTGGAGACA

GAAGAAATAGAGATGGTAATTATGGAGAGGTGTAAAATATCAAAAGCTGTGGTAATGG  
AACAGAATACTACAGATGAAGAGAAGAGTGCTGCTGCAGCAGCTGGAATAGAGACTT  
CACAAAACAGGCCATTTTTGGATGTGGTATATAATGCTCTGGACTGCTCGGGAGATGAT  
TATTATGCATTGTTTGTCTTTGTCTGCTCTATGCAGTGTCCCACAACAGAGGTATTGATT  
CTACTCTGCTAGAAAAAATCCAGCTTCCATTTTCGGCAAACAGCTGAGAAGACAGTATAT  
AGTCATGTTCTTGCTGAGAGGCTAATCAGGATAACGATCAATGCTGCCCAGCCAGACA  
GCAAGATTCGACTTGCAACTTTGGAACCTTAGTTGTTTGCTTCTGAAACAGCTTGTAATTT  
CAGACAGCGGCTGTGTTATAAAGGACATACACCTGGCTTGCCTGGAGGGGGGAAGAAAT  
TTTTCTTGATGTGTTTGAAGATGAATACAGAAGCATGATGAACAAACCACTGAATGTAG  
AGTACCTGATGATGGATGCTTCCATTCTGCTGCCCCCACTGGGACTCCGCTGACTGGTA  
TTGATTTTGTAAAGAGACTTCCCTGTGGAGATGTCGAGCGAACACGAAGAGCAATAAG  
AGTTTTTTTCATGTTGCGAGCTTTATCACTGGAACCTGAGAGGAGAACTGGAGACTCAGC  
TGCCCTTGACAAGGGAGGAAGATCTGATTAAAACTGAAGATGTTTTGGATCTTAATAAC  
AGTGACTTGATTGCCTGCACAGTGATTGCAAAGGATGGAGGACAAGCTCAGCGATTTCT  
GGCTGTTGATATTTACCAGATGAGTTTAGTTGAACCCGAGACCAAAAGACTTGGCTGGG  
GTGTGGTGAAGTTTGCTGGACTTCTGCAGGATATGCAGGTCACTGGGGTGGAAAGATGAC  
AGCCGTGCGCTAAATATCACAATTCACAAGCCCACATCAAATCCTCATGCCAAACCATT  
TCCCATTTTACAGGCTACATTTATCTTTTCTGATCATATCCGCTGCATAATTGCAAAGCA  
GAGACTGGCAAAGGGCCGCATCCAGGCACGGCGTATGAAAATGCAGAGAATAGCAGC  
ATTGCTAGATCTTCCTGTTTACGCCATCTCCTGAGGTAATGGGCTTTGGACATGTTACAAG  
TGCAGCTACCCAGCATCTGCCTTTTCGATTTTATGACCAGTCAAGACGTGGATTAAGTG  
ACAGTGCAGTTCAGCGTTCTGTGTTTGCTTCTGTTGACAAAGTTCCAGGTTTTGCTGTAG  
CCCAGTGTGTAAACCAGCATACTTCTGCACCAGCATCCTCACCATCCCCTCCTTCCAGC  
AGTAGCCCCAATGGCAGTGGGAGCACTGGTCATTGTGATTCAGTCACAGCTAGCACAA  
CATCCACTCCTGCAGCCCAAAGTCCATCAGACGATCCAGCATCTTTGGAAGAGTCATCG  
CTGAATCTGCCTGCGCAGGTGGAGTTTGTGTTGATGAGACTAGCTGTAGCACTCCAGGCCC  
CAGCAAGAACTTCCAGAGGAACTCTGAGTCTGAACCAGCTAACCTGGCCCCAAGCCTT  
ACCCCTTCTCAACAGCCAACCATATCATTACTGTGATGACAATACAGATGCACGCAG  
TGTGGAGTCCTTGACACTTGTCCACCTGCTGATCCACATTGCATCTTAAGTTTTAGCAA  
CACTGTACAGTCCTCAGTGCTGTCTGAGTCAGCATTAAACCAATGAGGGGTATCATGCTG  
AGACTTTTGAACCAGAAACAAGTACAGAAGTGTGAACAGAACCCATTAGACTTTTTTCT  
CTTCTTGGAAATGGGAGACTCTGTGAACTTCAATGACTTTTGATGCAAAACACTGCAAT  
ATACCACGTTGTTTATGTTAGTAGAAGTGAATGCAAGCAACTGTCTTTAATGTCTATGGG  
AGAGATGTTGAAGGAAGACTGATGAAGCTGAATTTCTTCACTGATTAGTCCATATAATA  
AAAGGAAAGTGCAGTCTCCCTGCTGATTGAACAAAATTTCCAGGTGTTATTTATTCACA  
CAGCTTAGTTCTGCTATTTTACAGTGTGTAACAATGACTTGAAGGTGGACAGCTGAAG  
GAGGTCTTCTTTTCTTCCCCATTTTATTGTCTGCCGCCAAGTTTTGTTAGACTAGGCTTTT  
GTATCTGCAGGTTGTGCTGCTACTACAAGTCCATGTGATGTGTGAAAATACCATTGTGCTG  
CTGATCTAATGGAGTCAGGATCGTAGTTTTGAAATAATGGCCTGCCTAAATAAAATCAT  
TTACCATGATCTTCCAAACAAGTTGTATCTTGTACACTAAAATTGCACTGGATGTTTAGG  
GACCAAGTATAATTTTGTGAAACATACGTTCTTATTTATTCCTTTTGTGTTAGTTATAAATA  
TGGGTTATGTTAAAAATGTTAAAGTGGCCTACAGTAATATAGCAGATGCATTATGCCAT  
GTGTTTGCATTTCAGTTAGATGCATTTTCCCTGTATTTAGTGCAGATTTAG

>CLEC16A-B\_TRINITY\_DN2288\_c0\_g2\_i2

CTAAATCTGCACTAAATACAGGGGAAAATGCATCTAACTGAATGCAAACACATGGCATA  
ATGCATCTGCTATATTACTGTAGGCCACTTTAACATTTTTAACATAACCCATATTTATAA  
CTACAACAAAAGGAATAAATAAGAACGTATGTTTCACAAAATTATACTGGTCCCTAAA  
CATCCAGTGCAATTTTAGTGTACAAGATACAACCTTGTGTTGGAAGATCATGGTAAATGAT  
TTTATTTAGGCAGGCCATTATTTCAAAACTACGATCCTGACTCCATTAGATCAGATGACA  
AATGGTATTTTCACACATCACATGGACTTGTAGTGACTGACAACCTGCAGATACAAAAG

CCTAGTCTAACAAAACCTTGGCGGCAGACAATAAAAAATGGGGAAGAAAAGAAGACCTC  
CTTCAGCTGTCCACCTTCAAGTCATTGTTCAACACTGTGAAAATAGCAGAACTAAGCTG  
TGTGAATAAATAACACCTGGAAATTTTGTTCATCAGCAGGGAGACTGCACCTTTCCTTTT  
ATTATATGGACTAATCAGTGAAGAAATTCAGCTTCATCAGTCTTCCTTCAACATCTCTCC  
CATAGACATTAAGACAGTTGCTTGCATTTCACTTCTACCATGAACAACGTGGTATAT  
TGCAGTGTTCATCAAAAAGTCATTGAAAGTTCACAGAGTCTCCCATTTCCAAGAAGAG  
AAAAAAGTCTAATGGGTCTGTTCACACTTCTGTACTTGTTCCTGGTTCAAAGTCTCAG  
CATGATACCCCTCATTGGTTAATGCTGACTCAGACAGCACTGAGGACTGTACAGTGTG  
CTAAAACCTTAAGATGCAATGTGGATCAGCAGGTGGGACAAGTGTCAAGGACTCCACAC  
TGCCTGCATCTGTATTGTCATCTGACAGTAATGATATGGTTGGCTGTTGAGAAGGGGTA  
AGGCTTGGGGCCAGGTTAGCTGGTTCAGACTCAGAGTTCCTCTGGAAGTTCCTTGCTGGG  
GCCTGGAGTGCTACAGCTAGTCTCATCAACAAACTCCACCTGCGCAGGCAGATTCAGC  
GATGACTCTTCAAAGATGCTGGATCGTCTGTTTCCTGCTTTGTAAGAGCTGCTGCTGCT  
TGAAGACCTAAACCCAGTGTCCACCATGACTGTCAGCTTCCGACAGACTAAAACTCG  
CCGCCGTCTTTCTGCCAGACCTTACTGATGGACTTTGGGCTGCAGGAGTGGATGTTGT  
GCTAGCTGTGACTGAATCACAATGACCAGTGTCTCCACTGCCATTGGGGCTACTGCTGG  
AAGGAGGGGATGGTGAGGATGCTGGTGCAGAAGTATGCTGGTTTACACACTGGGCTAC  
AGCAAAACCTGGAACCTTGTCAACAGAAGCAAAACACAGAACGCTGAACTGCACTGTCA  
CTTAATCCACGTCTTGACTGGTCATAAAATCGAAAAGGCAGATGCTGGGTAGCTGCACT  
TGTAACATGTCCAAAGCCCATACCTCAGGAGATGGCTGAACAGGAAGATCTAGCAAT  
GCTGCTATTCTCTGCATTTTCATACGCCGTGCCTGGATGCGGCCCTTTGCCAGTCTCTGCT  
TTGCAATTATGCAGCGGATATGATCAGAAAAGATAAATGTAGCCTGTAAAATGGGAAA  
TGGTTTGGCATGAGGATTTGATGTGGGCTTGTGAATTGTGATATTTAGCGCACGGCTGTC  
ATCTTCCACCCCAGTGACCTGCATATCCTGCAGAAGTCCAGCAAACCTTCACCACACCCC  
AGCCAAGTCTTTTGGTCTCGGGTCAACTAACTCATCTGGTAAATATCAACAGCCAGA  
AATCGCTGAGCTTGTCTCCATCCTTTGCAATCACTGTGCAGGCAATCAAGTCACTGTTA  
TTAAGATCCAAAACATCTTCAGTTTTAATCAGATCTTCTCCCTTGTCAAGGGCAGCTGA  
GTCTCCAGTTCTCCTCTCAGTTCAGTGATAAAGCTCGCAACATGAAAAAACTCTTATT  
GCTCTTCGTGTTGCTCGACATCTCCACAGGGAAGTCTCTTAACAAAATCAATACCAGT  
CAGCGGAGTCCCAGTGGGGGGCAGCAGAATGGAAGCATCCATCATCAGGTACTCTACA  
TTCAGTGGTTTGTTCATCATGCTTCTGTATTCTTCAAACACATCAAGAAAAATTTCTT  
CCCCCTTATAAAAAGCGTCGTAAGAGATGGACACTTCTTCCCTTGCACCCTCCAGGCAA  
GCCAGGTGTATGTCCTTTATAACACAGCCGCTGTCTGAAATTACAAGCTGTTTCAGAAG  
CAAACAATAAGTTCCAAAGTTGCAAGTCGAATCTTGCTGTCTGGCTGGGCAGCATTGA  
TCGTTATCCTGATTAGCCTCTCAGCAAGAACATGACTATATACTGTCTTCTCAGCTGTTT  
GCCGAAATGGAAGCTGGATTTTTTCTAGCAGAGTAGAATCAATACCTCTGTTGTGGGAC  
ACTGCATAGAGCAGACAAAGGACAAACAATGCATAATAATCATCTCCCGAGCAGTCCA  
GAGCATTATATACCACATCCAAAAATGGCCTGTTTTGTGAAGTCTCTATTCCAGCTGCTG  
CAGCAGCACTCTTCTCTTCATCTGTAGTATTCTGTTCCATTACCACAGCTTTTGATATTTT  
ACACCTCTCCATAATTACCATCTCTATTTCTTCTGTCTCCAAAGTAGTCTGTTGCTTTTT  
GAAGTCCGTCTGTACCTTTTGCCTTGTGAGGATCTTCCAGAGTTTCATCTGGAGGTTTTT  
CCTCTTCTCTCTCTCACCCACATTCTTATAATTTGGCCTTTTCTGTGCTTTTTTTCTCCCC  
CTCTGCTTACTGATCTCAAGTGATTTCTCAAGACTCTCTGCAGGCTTTGTGAAGCATCGT  
ATATTGGACTTTGCCATGCTCTTCTGTACATCTTGCTCTGTCTGTGCAGAAAACACAGAA  
AGGTCACCGTTCAAATAACATCAGCCAAGGAGTTCACCAAAGGTGAGTAGTGTATGA  
TCAGAAAGACCTGTGAAAGGAGATAGAGTGACACCTGCGCGCTGATTTTTGGAAGCTC  
TCCACACTTTTCATGAGTTACTAAGGAGTAGACATACAAAGGCAGGAACAGTCTGTTCA  
GCAGGTGATCTGTAAGCACATCATTTAGAAATTCACAGTTGATAATCAGAATGTCATTT  
AGGTAATGCAAGTGGTCGAGGTGCTCTGCAACAAGGTCACCTCAGCTTGCTCTTGTTTGC  
GTGTTCTTCATCAGTCTGGACACAGTTGTCCAGTTCTATCACATGGCTCCCAATGAACCA  
GACCAGATTGGAGAAATAGGGGGCAGCAGTTTTGTCTCTAATATAATGTAGCATATGCT

GGTTGTTCACTTTATAAACATTAAGAGTGATGGTCCTGACAGCAATTCTGACCATGCTTT  
CTGGATGATTAAAAAATTTGATTGCCTCTGTATACAATGCAAAATCATTGTGTGCTCAT  
TGTAAGAGTGTACTGTATGGTTGTTGAGCTTCAATGACAGTGTCTTCAGGAATGAT  
ATGTAGTATGCCATAATCTCCTCATCAGAGAAGTCAAACCTTGTGAACGATAATTGAATT  
CACATGGTTGTTGGACAGTAAGTAATAAAGGGATGTTTCGTGGCTGATGTTCTCAAACA  
AAATATTCAGGGTCTGAAGCAGCTGCACACAGACATAGCGCCCAGATTTCTGCCGAAG  
AATATTCAAGAAGAAGGCCAAACATATTTTCTCCAAAAAGAAATCAAACACTGAGCTG  
TCATTCTGGTCACCCCAAATGAGAATTCAGTGATAGAACGGATGGTTTCTACTAGCAG  
GTCACGGTTGTGATCAGTGACAGTAGTGTTTTAGTTAAGAGGTGATGCATATTTTTTAA  
GTGGTCCAAAGAGTGAATGCTCTTTGAAGACCTTCCTGGACCGCCAACCATCCAGCTTC  
TAGAACGGCCAAACATCCTGAATGGATTTTAGTCTCCGTTACCCATTTTGAAAACCAAC  
AACCACGTTTGAAGTACCCAAATCTTCCTTTAATAAGTGACATTACCATTCCCACATAT  
CCAAAATTTTCAGCCATCGCTAATC

>CLEC16A-C\_TRINITY\_DN2288\_c0\_g1\_i3

GATTAGCGATGGCTGAAATTTTGATATGTGGGAATGGTAATGTCACCTATTAAAGGAA  
GATTTGGGTACTTCGAACGTGGTTGTTGGTTTTCAAATGGGTAACGGAGACTAAAATC  
CATTCAGGATGTTTGGCCGTTCTAGAAGCTGGATGGTTGGCGGTCCAGGAAGGTCTTCA  
AAGAGCATTCACTCTTTGGACCACTTAAAAAATATGCATCACCTCTTAATAAAAAACAC  
TACTGTCACTGATCACAACCGTGACCTGCTAGTAGAAACCATCCGTTCTATCACTGAAA  
TTCTCATTTGGGGTGACCAGAATGACAGCTCAGTGTTTGATTTCTTTTGGAGAAAAATA  
TGTTTGCCTTCTTCTGAATATTCTTCGGCAGAAATCTGGGCGCTATGTCTGTGTGCAGCT  
GCTTCAGACCCTGAATATTTTGTGTTGAGAACATCAGCCACGAAACATCCCTTTATTACTT  
ACTGTCCAACAACCATGTGAATTCAATTATCGTTCACAAGTTTGACTTCTCTGATGAGGA  
GATTATGGCATACTACATATCATTCCTGAAGACACTGTCATTGAAGCTCAACAACCATA  
CAGTACACTTTTTTTACAATGAGCACACAAATGATTTTGCATTGTATACAGAGGCAATC  
AAATTTTTTAATCATCCAGAAAGCATGGTCAGAATTGCTGTCAGGACCATCACTCTTAA  
TGTTTATAAAGTGAACAACCAGCATATGCTACATTATATTAGAGACAAAACCTGCTGCCC  
CCTATTTCTCCAATCTGGTCTGGTTCATTGGGAGCCATGTGATAGAACTGGACAACCTGTG  
TCCAGACTGATGAAGAACACGCAACAAGAGCAAGCTGAGTGACCTTGTTGCAGAGCA  
CCTCGACCACTTGCATTACCTAAATGACATTCTGATTATCAACTGTGAATTTCTAAATGA  
TGTGCTTACAGATCACCTGCTGAACAGACTGTTCCCTGCCTTTGTATGTCTACTCCTTAGT  
AACTCATGAAAAGTGTGGAGAGCTTCCAAAAATCAGCGCGCAGGTGTCACCTCTATCTC  
CTTTCACAGGTCTTTCTGATCATACTACTCACCTTTGGTGAACCTCCTGGCTGATGTTA  
TTTTGAACGGTGACCTTTCTGTGTTTTCTGCACAGACAGAGCAAGATGTACAGAAGAGC  
ATGGCAAAGTCCAATATACGATGCTTCACAAAGCCTGCAGAGAGTCTTGAGAAATCAC  
TTGAGATCAGTAAGCAGAGGGGGAGAAAAAAGCACAGAAAAGGCCAAATTATAAG  
AATGTGGGTGAGGAGGAGGAAGAGGAAAAACCTCCAGATGAACTCTGGAAGATCCT  
GACAAGGCAAAAGGTACAGACGGAGCTTCAAAAAGCAACAGGACTACTTTGGAGACA  
GAAGAAATAGAGATGGTAATTATGGAGAGGTGTAAAATATCAAAAAGCTGTGGTAATGG  
AACAGAATACTACAGATGAAGAGAAGAGTGCTGCTGCAGCAGCTGGAATAGAGACTT  
CACAAAACAGGCCATTTTTGGATGTGGTATATAATGCTCTGGACTGCTCGGGAGATGAT  
TATTATGCATTGTTTGTCTTTGTCTGCTCTATGCAGTGTCCACAACAGAGGTATTGATT  
CTACTCTGCTAGAAAAAATCCAGCTTCCATTTCCGGCAAACAGCTGAGAAGACAGTATAT  
AGTCATGTTCTTGCTGAGAGGCTAATCAGGATAACGATCAATGCTGCCAGCCAGACA  
GCAAGATTCGACTTGCAACTTTGGAACCTTAGTTGTTTGTCTTCTGAAACAGCTTGTAATTT  
CAGACAGCGGCTGTGTTATAAAGGACATACACCTGGCTGCCTGGAGGGGGGAAGAAAT  
TTTTCTTGATGTGTTTGAAGATGAATACAGAAGCATGATGAACAAACCACTGAATGTAG  
AGTACCTGATGATGGATGCTTCCATTCTGCTGCCCCCACTGGGACTCCGCTGACTGGTA  
TTGATTTTGTAAAGAGACTTCCCTGTGGAGATGTCGAGCGAACACGAAGAGCAATAAG  
AGTTTTTTTTTCATGTTGCGAGCTTTATCACTGGAAGTGAAGAGGAGAACTGGAGACTCAG

CTGCCCTTGACAAGGGAGGAAGATCTGATTA AAACTGAAGATGTTTTGGATCTTAATAA  
CAGTGACTTGATTGCCTGCACAGTGATTGCAAAGGATGGAGGACAAGCTCAGCGATTTG  
TGGCTGTTGATATTTACCAGATGAGTTT AGTTGAACCCGAGACCAAAAAGACTTGGCTGG  
GGTGTGGTGAAGTTTGCTGGACTTCTGCAGGATATGCAGGTCAGTGGGGTGGAAGATGA  
CAGCCGTGCGCTAAATATCACAATTCACAAGCCACATCAAATCCTCATGCCAAACCA  
TTTCCCATTTTACAGGCTACATTTATCTTTTCTGATCATATCCGCTGCATAATTGCAAAGC  
AGAGACTGGCAAAGGGCCGCATCCAGGCACGGCGTATGAAAATGCAGAGAATAGCAG  
CATTGCTAGATCTTCCTGTTTCAGCCATCTCCTGAGGTAATGGGCTTTGGACATGTTACAA  
GTGCAGCTACCCAGCATCTGCCTTTTCGATTTTATGACCAGTCAAGACGTGGATTAAGT  
GACAGTGCAGTTCAGCGTTCTGTGTTTGCTTCTGTTGACAAAGTTCAGGTTTTGCTGTA  
GCCCAGTGTGTAAACCAGCATACTTCTGCACCAGCATCCTCACCATCCCCCTCCTTCCAG  
CAGTAGCCCCAATGGCAGTGGGAGCACTGGTCATTGTGATTCAGTCACAGCTAGCACA  
ACATCCACTCCTGCAGCCCCAAAGTCCATCAGTAAGGTCTGGCAGGAAAGGACGGCGGC  
GAGTTTTTAGTCTGTGCGAAGCTGACAGTCATGGTGGACACTGGGTTTAGGTCTTCAAG  
CAGCAGCAGCTCTTACAAAGCAGGAAACAGACGATCCAGCATCTTTGGAAGAGTCATC  
GCTGAATCTGCCTGCGCAGGTGGAGTTTGTTGATGAGACTAGCTGTAGCACTCCAGGCC  
CCAGCAAGAACTTCCAGAGGAACTCTGAGTCTGAACCAGCTAACCTGGCCCCAAGCCT  
TACCCTTCTCAACAGCCAACCATATCATTACTGTCAGATGACAATACAGATGCACGCA  
GTGTGGAGTCCTTGACACTTGTCCCACCTGCTGATCCACATTGCATCTTAAGTTTTAGCA  
ACACTGTACAGTCCTCAGTGCTGTCTGAGTCAGCATTAAACCAATGAGGGGTATCATGCT  
GAGACTTTTGAACCAGAAACAAGTACAGAAGTGTGAACAGAACCCATTAGACTTTTTTC  
TCTTCTTGGAATGGGAGACTCTGTGAACTTTCAATGACTTTTGATGCAAAACACTGCAAT  
ATACCACGTTGTTTCATGGTAGAAGTGAAATGCAAGCAACTGTCTTTTAATGTCTATGGG  
AGAGATGTTGAAGGAAGACTGATGAAGCTGAATTTCTTCACTGATTAGTCCATATAATA  
AAAGGAAAGTGCAGTCTCCCTGCTGATTGAACAAAATTTCCAGGTGTTATTTATTCACA  
CAGCTTAGTTCTGCTATTTTCACAGTGTGAACAATGACTTGAAGGTGGACAGCTGAAG  
GAGGTCTTCTTTTCTTCCCCATTTTTATTGTCTGCCGCCAAGTTTTGTTAGACTAGGCTTTT  
GTATCTGCAGGTTGTCAGTCACTACAAGTCCATGTGATGTGTGAAAATACCATTTGTCAT  
CTGATCTAATGGAGTCAGGATCGTAGTTTTGAAATAATGGCCTGCCTAAATAAAATCAT  
TTACCATGATCTTCCAAACAAGTTGTATCTTGTACACTAAAATTGCACTGGATGTTTAGG  
GACCAGTATAATTTTGTGAAACATACGTTCTTATTTATTCCTTTTGTGTAGTTATAAATA  
TGGGTTATGTTAAAAATGTTAAAGTGGCCTACAGTAATATAGCAGATGCATTATGCCAT  
GTGTTTGCATTACAGTTAGATGCATTTCCCTGTATTTAGTGCAGATTTAG

>KLRG1\_TRINITY\_DN6253\_c0\_g1\_i1

TTTTTCAGAGTAAGAATTGTGCTTTTTTTTGTAACATTTATTTTTTTTAGACAGTCCTACAATT  
GTAAGTGTAGTCCACTTTTAATGCAAGCTGCTAAATGCATCCTTTGTACATATGAAGTTG  
AAGTCTTCTTCACACGATGAGGCTGAAAGTCCATGGGAGTTAATGACTAGACATCTCTG  
TCCCACATAATTACTTCTCACAGGAAAAATGGTGGTATTCAGAGGAATTCCATCTTCCC  
AAATCCACATGTCAATTTGTTTTGTGATCCCAATCCAGTGATATGTTTCTTTTGCTACTTT  
GTTTGCAAAATTCATTGCTTCCTTTTGTGTTTCCTTAAATATCGATGAATGATGTGCTGAA  
CAAAATTCCTTGGAAGAAGTCCAGTTCTTCTTTTATCAGAAAATAGATAACATTTACTA  
TGGTATCCAATCCATTTTTCTTGGCATAACGAAGCACTTTCCTGTACCATTGCTTTCTGAAT  
CTTTGCACTTCTGAGTTATCATCTTCCATTCAACTAACAGAAGAGTGAGGATTGACACTG  
CCAACAAAAGGCACAATGTGGAAATGAGGAACATAATGCAACAACAATTGAAATTAG  
ATGATTTAGGATCTTTCTCATTTCCAGAGTGCTGTTTTTGGTGTTCAGTGTGCTGGGCTC  
CTTGACTGTACCTCTGGCTGTTCTTGTGGTGGCTTTCTCATTTCCAGAGTGCTGTTTTTGGT  
GTTCCAGTGTGCTGGGCTCCTTGACTGTACCTCTGGCTGTTCTTGTGGTGGCTCTTTCTTT  
AGCTGTTGGCTCAATTTTTTTGAGTAAAACTGAATTAATGTATATATTGCACTCTTCTTC  
CTCACATCTTGTACAGCTTGATTATTCAGATTTTCAGCTTTTGTGTGTTTAAATTAG  
ATATGTTGCAATAGATAACTCTGTTTTGTCTTTCATGTTTTGTGAGCTTTCTTCTTCCAA

AGGTCCTGCTGTAAACTATGTTACTTTTTTAGCAGATAAGATGTATTTGTTTGTGCGCTTTG  
ATTTTCTTCCAGGTTGCTGAAGGTTCTACTTTCTGTTCTGCATTATTAGCATTAACTTTAC  
ATTGCTAGTGACAGATGGTCAGTTCTATCCCCATA

>SELE-A\_TRINITY\_DN68820\_c1\_g1\_i11 len=2308 path=[3:0-165 8:166-231 10:232-232 12:233-912  
13:913-942 15:943-2307]

CTGGGATGAAACTGCAGTCGGCGGTTTCAGGGACATTTTGTAGCTGTTTCGTTTCCAAAC  
AGCTACTCGTTTCAGCTGATCGAGGGGAACGCAGAGGGACTGATCAGCTGATTTTCCATG  
CCACTTCCACCAGGGAACCTTTCTTTACTACGTTGTTAGTCAGCAGCTCGACCTGAAGAG  
GGAGCTGCTGACTTAAGTCCTGGGAGAATGCCACATTTGTCTCTGTGGCTTTTTTTAAAT  
CATGCAGTTCTCCCAGGCAAGTGAAGATATTTAACCTCTCCACCAGGAAGAAACTGCA  
GTCGGCAGTTTCTGGGTGATACTAGCTGTTTTTCAAAGAGCTACGCATTTCAAGCTGATT  
TAGGGGAATGTGAACAGACTGATCAGCTGTTTCTTGGTGCCACTTCCACCAGGGAAACT  
TTATTCACCTAGTAATAGTTACCACGCAAAAAAGACAAAGCAATGCAGAACCTGTGC  
GAATGAAGGCTTTTATTCGCAACGGATACTTAATGACATTTGATGAAGCTAAAGAATAC  
TGTCAAACATACTACGATGGCCTGGCAGAGATCTATCAAGAATCAGAGAATGCTCAAA  
TACCAGAATTTATTCATGAGAGACAGTGCTGGATAGGTACTGAAAACCTGTCAGAGGGT  
CTTTGCCACAAATTATACTGAATGGTGCTACAGCAGAAGTAAACGCAATGTCAGCTTTT  
TACCCTGGAAGAAAACAAAACCCGAATACAACCATGTGCAAGGGACATATGCCTGTGT  
CTTTATTAAAGATGATGCTATGTGGCATCTTGAACCATGCAAAAACAAAGAAAACATCA  
CTCTGTCAAAAATTGCACTGTGGTACCCAAAGCTGTAGCGGACGAGGCAGATGCATGG  
AGGAGCTGAACCTCTACCAGTGCAAGTGCTTTCCAGGGTTCAGTGGTCCTAACTGTGAG  
ACTGTGACACACTGCCCAAAGCTTGCTCCTCCAGATGATGCAGAAAGTGAGGTTTGTAGT  
GGGAAGCCATGGACCTCTGGCTTTTTCTGCGGTGTGGAATTTTAGCTGTATAGAAGGATT  
TATGCTGAATGGAACCTCACAGACTACTTGTCTACCTTCTGGATTGTGGAGTCACTACTC  
ATTTCAAGTGTGTGGCTAAGACAGATTATCCTTCCAACCTTACGGAAGCTTGTGTTGCTGC  
TGCCACTGCTGGGAGTTCCATTTTGATATCTATCACTGTGTTCTTCATTTGGAAGCATTAC  
TCTGCAGGAGGTGCGTGTA AAAACTTTAGAAACACTGAGGCTGACTACCAGTGTCTGCT  
GCTAGAAGAAGTAGAGAGAGATTTGGAAAATACAGTCTTGTGAGCACTGTAGAATTAA  
ATGCATGTTAAACAATGCTGAACTTGTCACTACCTTGTGCACTTAAAAATGAATCATT  
ACACATTCCTGTCTCTTGAAAAGTAATGTATTTATCCCATATTCATTAATTTCTGTTCTAC  
CCTGACAGAGCAAGTGAGGCACACTTGGTGTAGTTGCAGGCAGCACTAATAGTTATGA  
TTTGCTTTTACCAGAAAACAGATTCCAAGCATATATATGGCATGCTGTTGGGCATAATG  
AATCCTCAAACAAGCATCCACGATTCCATATTTTGCATAGTTAGATACCCGTGAACAAA  
AATGCAATGTACTTTGTCAATTAGTTTAAAGATTGCTGTAAGTGGCATGTAGACACACTGCT  
CAAGAAGTAGTAATCCAGTAAATGCATGTACTTGCTGCAGAGAGAATGAACTACTT  
TTGAAGATCTGTAATACATTACATTTCTCTACAGGCTTTCCCCTGATGTGCCCCTGAATT  
CAATATCTGTATCTGTTCTAAACATGTCAGTGTTTGTACTGATTATTGCAATTGTTATTCA  
CTGTGCTTTTTATTTTGAGAGTGAGTTAAACTGCTAGAATTGCTTGGAATATCAGTTGTA  
TATCCATGCACTGCTTATAGTTTCTTGATAGATTTAAATATGTGAAAAGTTTAAATGGGAGT  
TAAGAATCACCTGCCTGGACTGTCTGACCGTTATGTTTATGTTTGTCCATAATCACTCTG  
ATACTTTATACAATAGTGTAGCTATTATTTTGTAGTATACTAAAACAGTGCAACATCAGC  
AGCACTTTTGAATGCTTAACAAAGTTGTTTTGTAACCCTAATAAATCAGATGGTGTGATG  
GACTGTCTTTGTATCAGGGGTAAAAGCAGTGCTGATAGCAAATGTTTATGTCAATCATC  
ATATATGCCTGCTTTGTGGCACAAAATAAAAGTTTAAAGAAGTATATTTTCTTCTGAAT

>CD209\_TRINITY\_DN7436\_c0\_g4\_i1

AAGTTGCTCATTAACACTTCCACATGAGAATTGAAAAAGAATATTTAAGACATTTGAAC  
AACTTCAGACAAACTGAAAAACAACCTGAAATGACAGCAAGACTACAGAAAGCAGCAA  
AAGAAGAAATGATGAAGCGTGGAAGGATATTCAGTGCTGTTGATTATTTCCACTATC  
ATCCTTGTGCTCTGCTGGTCATAAATGTAATCTTATTGCTTTTAACTATACGGATGTCAG

CD302\_TRINITY\_DN8442\_c0\_g1\_i6 len=1547 path=[0:0-1027 2:1028-1028 4:1029-1546]  
ATATGGGACGTGAGTTGGCCCTCTTTTTTTTTTTTTTTTTTTTTTTTTTTTTTTTTTTTTGCTAT  
GAATGGATTTTCTTTCATTTCTTGGATACCTTATAGACCAAGACTGAGAAGAAGTTTGCA  
AAGCCTACCCACTTGCCTTAAGTCATTCAGAAGACAGTATTACATGGAAC TAACAATCC  
TTCCTTCATGTTGTGGAATACAGGAACATGAACACTTTCTTCTTTCAGGGTGGCCTGCAC  
AGGGAGGTTCAATTTCTGAACCTGCTATCAGAAGTGTTAAGGGTACCAAAAAC TCTCAGA  
CAACTGTACCACAAACACCTCTGAGAAATTAATCAGCTCAGAGACAAC TGTAAACACAA  
CACCTCTAGAAACACATTTTCAGACGTCATTTACCTTACAGAGGTGATGCACAAATTAC  
CTTTTTCTGATCCACTGAAAGAAGATATGTTGTGACGAACAAC TTTTTTTCTTCTTTTG  
TGCTGGTTCAGAACATGCATTTTCTTAATTATGTTGCAACAAACATCTGCAGCATATTTCT  
TGTGTGAGAAAATATTTAATTCTGTACTTTAATACCTTTAAGCTGCTACACAGCTAAAAC  
CCATGAGTCCTGAAAATAACAGTGGAAAGTCTGACAAAAGACTCTACAGGTGAACTTT  
TCACAAATGCATTCAGACTTTTGAAAGAAGGTAATAAACAGATCACTTTTTAGCACATT  
CTACATCCTGATAAGTAACATTTCTATGGCTTTATATAGTTAGTACAAATACTGAAAGG  
ATAAATATTTTCTTGTGGTTTTTCAGATACAGACTTTTAAACTGTTATATATCCTGTGTTAC  
ATGTTCAACTTCCTCAGAGTCTAATAAAATGTGTTTCATCATGTGGAGTTCGGGCTGCTGG  
TTGATAATCAAGTGATGACGATCCCAATGAGGTCTGTTTTCGTTCACACAGGAACCAAA  
ACACTACTGATGAGATACTCACGAATGTGACAGACATGATAACCAGGACAGTAATCAA  
AGCCTTCTTGTACCTTGCTCCAGTGTCCAGATTTGATATGAATGACGGCACATATCTCG  
GCAAGAGGCAAATCTTCACTGTATTGTTTAGTCCAGTTCGAATATGACACTTCTGAGTTG  
TCAAACCATTTCAAAC TATCCGTGTCTGTATCATAAAACATGCCAAGCCAAACTTCTTC  
AGGTCCCTGCCAATTTGTCCTGTAAAGTGT TACTAAAAACATTTTCTTCTCACTGTTC  
ACACTCAAAAGGTCAGCACTGGAAGCTGAAGCTCTGCAGAGTTCCCTTGCATCTTCTAT  
ACCAAGGGAATGTTTTGAAAATTCATCCAAAACAGTATAACATCTGTTCTTATACGATA  
TCCATGAAATCTTAGTCCCAGATGGACATTCTAAACACATAACGGAAGGGCAATGGAA  
TACAAAATAAAAAACAGCCCCAACAAAACAGCAGTGCAGATGCCTTTTTTCACTTTCTGC  
ATGTTTATATTTCATAGTCTAAAAACATTACTCGTACTCCACAACGTTTTTGGTCTGCAAC

>CD22\_TRINITY\_DN22556\_c1\_g1\_i5  
TATATATATATATATATATATATATATATATACATACATATATAAAATCCAGTTTTC  
CAGGGTGAATCAAATGAACCTTATGATGTAATTCAGAGCTGCTAGGACACCTGTATTC  
ACAGCTGTAGTTATTTTTGAGGTCACCTTGTTGTGTCAGCAACTGTTTAAAAAGAAATAAT

GAACAGATAATTTCCACCCACTGAGAAACATATGATAAATGATAAGATTCTCTGACTG  
AAATTGCATTTACATTGAAATATGAGGAATGCAAGTCATATCTGAAACCAGATTTTCATG  
CCATTTTGTGTGCACAGAATCTTTGTTCTCTAAAATATGTTACATCATTAGCTTGAATTCA  
AAAGTTCCTTTGCAAATATTTTGTGTAATGACTGAGGAAGTATCAACTGAACTTGGGA  
TATCAACTTCTGGTTTTCTTTCTGTTAAATATGTTATTGCTCATACTGGAATAAAAATC  
TTCTTTTGAAGTGCATTATTGGATAATCCCTTTGGTATTTTCCTCTAATGATGCAGAGAAGG  
AAAAAAGGAATAGCAATAACCACTGATATTCCAATTGCTATTAATGCTTCTGTTGCAGC  
TAATAAAGTAGTTGTATCATGTAATTTTAAAGATAATGTCAATGATTTTTGTTGACCCAAT  
ATCATTGTGTGCTTCACAGCTGAAATTCCCAGTATCTTCAGAACTGATGTTTGTGAACCTT  
TAGCAGCTTCCCGGGCTGAACTGGAAGGTATTCATTTTCTTTATACCACGTGTAGTTTAT  
AACAGGAGGATTGCTGCTTTTATAGTTGCAGGTTAGATGCATGCTTTTTCTTCTCTTAA  
ATTTATGGGATGGTGTGTTATTTTAACTTCTTTAGGTGGATACATAACATCTATCTCGAAT  
TTCGGGGAATATGCCGATCCAACCTGTGTTATCAGCTTTACACCTGTAAGTACCACTGTG  
ACTGGTCTTAATTTCTTTAATGAATAAATACTTTTCAGAAATTGTCACCTCTTTTTTGTTA  
ATGTACCAGGCATATGTTGTCACTTCTGGGTACTCCTGTAACTTTGCAGGATAAGTTC  
ATAGAGTCACCTCCATAATATCCATGGGAGTAATATGAGTAATTTTTACATCTTTTGGT  
GCAAATAAAACATTCAGGATAACTGCAGGAGCACTTTCTATGACAGAATCAACTACAG  
CAAAACATGCATACCGCCAGCATGATTCTCTTTAATGCGGTCAAAGCGCAACTCTCTG  
TCTTCACCAACTATTTCCCAAGACTGTCTACTACGTTTACGCCATTGATATTCTGTGATTT  
TAGCATCACTGTTATTTGTGGAACAAATTAGTTTTACTTTGTCTCCTTCTTTAATAGTCCC  
TTCTGGTTGTACGGTTATGGTTATTACATTTGTGGCACCTATGTGGAAGATCAGAGGAAG  
TAGCAGAATGAATTCCATGTTAGTATGTTTCATTTTTTAAATTACAGCAGAAAAGCCTTT  
ATCTTTGTAAGCAATTTCTTTCCAAACCAAAATCAGCAACTCTGCATTCCAAAAGGAAAT  
ACTTATTGCAACTGAAACAATACAGCACTTCCACTTTTTCTTTGGCACTCCAGGAGCTC  
TGTGTCCATGCCTTTAAATGTGCTTGAATACATTCTCATTGGGCACACACAAAAGGAAG  
TCA

>ITLN2-A\_TRINITY\_DN388\_c0\_g2\_i4

GGAACATCAACAACCTCCGAAAGTGCTTTTCATCTCTGTAAATTCAAACGTGGTAGTACT  
TCTAATCTGTAGGTACAAATTATATATGTGATTATCTGAAGGATGGCGATATCCAGTTTG  
CTTATGTTTCAAGTGTGTGTTGATGGTGGCAGAGACAGATTCAAACAACAAACAGTGTA  
CCTGAGAATTCAGAAGAGTGTTTTACTTGAGAGTATTGCTGGCTGCTCTGATCACACATC  
AAATGATCAGGTTACAAACAACACACAACACCACACCCAGCAGAAGTATATGGCAAA  
AAGCTGCAAAGAGATCAAGGAAAAGTATCAAGTCAAGCAAGATGGCCTGTACTACCTA  
ACTACAGAAGATGGTGAAGTCTACCAGACATTCTGTGACATGACATCGAATGGTGGGG  
GCTGGACTCTCGTGGCCAGTGTTTCATGAAAACAACATACATGGGAAATGCACATATGG  
GGATCGCTGGACCAGTACTCAAGGAAACAGTGAGAAATATCCAGCAGGAGATCAAAA  
CTGGGTCAATCTGGCCACATTTGGTTTCAAGTGGTGAACCAAGTATGACTATAAGA  
ACCCTGGATACTTTGACATTGAAGCTGAGGACATTTCTGTCTGGCATGTCCCTAATAAC  
ACACCTCTCAAGAAATGGAACTGGATGCCATTCTGCAATACCACACTGAAAACAAGT  
TCTTGCCCAAGTATGGAGGCAACCTACAAGGGCTCTTTAAGAAACTGCCTCTTATGTTT  
AATATTGGAAGCTGCCCTAATAGTAATGGTCCAGCCATACCAATTGTCTATGATTTTGG  
AAATGCTGAGAAAACAATCAACTTATATTCACCCCTCTCCAAAAATGAGTGCATTCTGT  
GTTTTATTCAATTTTCGTGTTTTCAACTATGAGAAGGCTGCCATGGCAATTTGTTTCAAGGGT  
CAAAGTAAATCTGTGTAACACAGAGCATCACTGTATCGGAGGTGGTGGTTTTTTCCCAG  
AAGGTAATCCAGCACAGTGGGAGATTTACAGGATTTGCATGGGATGGTTATGGAAC  
TGGCCAAGGTGCTAGTGTAACCAAGAGATGCTGGAATCAGCTGTTCTCATATTTTACC  
GTTAAAGGACTTTGACTTTGGTGAATAACAGTTTCACTCAGCTCTTTTAAATCTGCATTGC  
ATTATTCCTCACCAACATTTATTTTGTATTTTTCATGAATACTCATTAGTGCTGTATACTTTT  
TAATTACACAATCAAAAACCAGAAAGCTGAATTTCTGTTACTTGCAGTGTGTAACAGA  
AGTTCCATCTTCCACCAATACTCCCAAAAGGAGGCACCATGGCAGTGAAGGAAATTCA

TAGACCCTTATCAGGATAGTTATAGCATGAGAACAGGCTGCAGCATAATCAACAACAG  
GCAACAGGAAACAGCTGTTAGAACATTAGAAGGCCACAAAAGAAACAATTTATTTTAA  
CTGTAGACCTTCCTGTCGATTGTGCATCTGATTTTTTAAACAGATTCAGAATTCATCGGTG  
CTGCAGTAAGGTAGTAGAGTAAAATCTAATAGCATAGGTGGGATTAGCTGCATTCATTA  
ATTTAAATGTTAGTTAAGTATGACTCAACAAATATTGTGTGTTACACAACCTGTTTCTAAC  
TTCCCACACTGTTAGATCAGGTTGTGGCTTGCACTGCTGTGTTATCTTGATGAAAATTAG  
AATTTTAAACAAAGAGCTTTAATACCAGAACTTCTATTCACCTCTTTTTTTACTAAATTTAT  
TTTTCAGATCTGCTTACCTGGCTTGCTTCAGTTGTTTGAAGATTCATTTTGCCCTAAAAAT  
GGTAGCATTAAACAATTCTGTTTCAGCAATAAGCTCTGTTATGTGCTTGCTTGTTTGTA  
AACTACTGTGACTTGAAAGTGCAGAGTATGGCTGTAAAAAACACTGACATCAAATTATC  
TCAATTTTTCCCATTCTAAGTTCTTTTATGCTACAAGCAAATTCTTTGACATTTGTTATTTA  
ACCATGTTTCTTCTATAGGATATGATAAAAGCATATTACAATTATGGAATGTATATGAAT  
TCATGATTAGGACAAAATATTATGCAGATTATAAAACTGAACATACAGAAATATAACTT  
TAATGGCATTATGTATTGAAATAGCAGCATGTTAGTGAAATAAAAAATGAATGAGTTTAA  
CAGTGGGTAGAGCAATAAACTA

>ITLN2-B\_TRINITY\_DN388\_c0\_g2\_i3

GGAACATCAACAACCTCCGAAAGTGCTTTTCATCTCTGTAAATTCAAACGTGGTAGTACT  
TCTAATCTGTAGGTACAAATTATATATGTGATTATCTGAAGGATGGCGATATCCAGTTTG  
CTTATGTTTCAGTGCTGTGTTGATGGTGGCAGAGACAGATTCAAACAACAAACAGTGTA  
CCTGAGAATTCAGAAGAGTGTTTTACTTGAGAGTATTGCTGGCTGCTCTGATCACACATC  
AAATGATCAGGTTACAAACAACACACAACACCACACCCAGCAGAAGTATATGGCAAA  
AAGCTGCAAAGAGATCAAGGAAAAGTATCAAGTCAAGCAAGATGGCCTGTACTACCTA  
ACTACAGAAGATGGTGAAGTCTACCAGACATTCTGTGACATGACATCGAATGGTGGGG  
GCTGGACTCTCGTGGCCAGTGTTTCATGAAAACAACATACATGGGAAATGCACATATGG  
GGATCGCTGGACCAGTACTCAAGGAAACAGTGAGAAATATCCAGCAGGAGATCAAAA  
CTGGGTCAATCTGGCCACATTTGGTTTCAGCAAGTGGTGCAACCAGTGATGACTATAAGA  
ACCCTGGATACTTTGACATTGAAGCTGAGGACATTTCTGTCTGGCATGTCCCTAATAAC  
ACACCTCTCAAGAAATGGAACTGGATGCCATTCTGCAATACCACACTGAAAACAAGT  
TCTTGCCCAAGTATGGAGGCAACCTACAAGGGCTCTTTAAGAAATTACCTCTTGTTG  
AATACTGGAAGCTGCCCTGATAATAATGGCCCAGCCATACCGATTGTCTATGATTTTGG  
AAATGTGAGAAAACATCCTTCTTATATGCACCTAATAGCAGAAATGAATTCACCTCTG  
GTTTTATCCAGTTTCGTGTTTTTAACTACGAGAAGGCTGCTTATGCAATTTGTTTCAGGGGT  
CAAAGTAAATCTGTGTAACACAGAGCATTACTGTATAGGAGGTGGTGGCTTCTTCCAC  
AGGGAGATCCAGTAACATGTGGAGATTTTCAGTGGATTTGCATGGGATGGTTATGGAAC  
AGGATCAGAGTGGAGTGTGACCAAGAGATGTTGGAATCAGCTGTTCTGGTGTGTTTACC  
GCTAAAAATCTTTCAGTGGATAACAGAGACTGGGCACTTCTACTCAGATTATAAGCAC  
ATATCACATCTTCTATCTCACATTCATATAATTTTTTCATTGATACCTAGCAGTGCTGCAA  
CTTTTTTATTTCGATTACATTGCAAAAGCCAAACAGTTTAGCTTGTGTTATTTACAGCGCT  
ATAGCAAAAAAACTAACTTCTTCCAGGTCAGTGTAGACTTTTTTGGGGATTTAGTCAGT  
TAAGTTATACTATGTTATAGAATGTGAAGATGTTGGAATGTATCCATTAACTGTTGTTA  
TGCTAAGATATGGCTTTGCCTGAAACAATTTCTTCAGTTGAAATTATGAGACTTTTTTTT  
TCTACAGCATCTTTACAGGTTTCAGAGAATTTGTTGCTATTCTTTATATAATTTAAGAGATT  
AAAACATATGTGTGAACAACAGCAATAAGTACAGCAGCTAGCTTTGTCAGGGAAGGGTC  
TGATTGTCCATAAGTAAGAAGTGAAGTTAACATATGTATTATGTATAGTTTACAATCA  
TCTATTCCCAAATGGTACGTCTAGTTAAAAATCTTTGACACCTATAAATAGTTGTGATTA  
TTAAAAAAAATAAAACGTATGATTATTAAAAAAATCTGTGACACTGTTGTGTTGTCAT  
GGTGAAGATGACCAGTCCATCTATTTAGCACTGACCAATAAATTGTTATTTT

>ITLN2-C\_TRINITY\_DN388\_c0\_g3\_i1

TAGTGTGCAAGCAATACACATTGAACTGTCCGGATTTATTGTACAATTGAAAAATAGT  
AAAGCAGTTGTGGGTACCAGTGAAAGCACAAGGTAACACTTGGCAAATGATTATTTATT  
GAAAATTAGTAAAATTGTCATTAACGGAAGCCAAAGTTCCTTAACGGTACATTATCAGA  
ACAGCTGATTCCAGCATATCTTTGGTTACACTCCAGTCTCGGCCAGTTCCATAACCATTC  
CAGGCAAAACCAGCGAAATCTCCACACTGTTTTGGATCACCTTCTGGGAAAAAACAC  
CACCTCCAATACAGTGATGTTCTGTATTGCATTTTGTACTTTGATTCTGAACATATGGC  
CAAGGCAGCCTTCTCATTGTTCAAAACACGGAATTGGATATAACCAGCAGAAAATTCA  
TTTCTGCCATTAGGTGAATATAGATTAGCAGTGGTTTCTGCATTTCCAGTATCATAGACA  
ATCGGTATTGCAGGGCCATTATTTTCAGGACAAGTCCCAATATTCCAGACAAGAGGAA  
GTTTCTTGAAGAGCCCTTGCAGATTATTTCCATATTTTGGGAAGAAGTCTGCTTTCAGTAT  
GATACTGGAGAATAGCATCGGATTTCCACTTGCTGAGAGGTGTGTTGTTGGGTACATGC  
AAGACGGATATATCCTCAGCAAGGATGTCAAAGAATCCAGGGTCTTATAATCATCACT  
GGTTGCACCACTTGCTGTGCCAAATGTGGCCAGGTTGACCCAGTTTCCATCACCTGCTG  
GATATCCTTGCTGATTTCTTGTGTACTTGTCCAGCGATCTCCACTGGTGCATTTCCCATC  
TATATTGTTTTTCATGAACACTAGCCACAAGAGTCCAGCCCCCTCCATTGGTAGTCATGTC  
ACAGAACGTTTGGTAGACTTCACCATTTTCTGTAGTTAGATAGTACAAACCATCTTTCTT  
GACCTTGTACTTTTCCAAGATTTCTTTCAGCTTCTTGCTACATATTTCTGCTGGCCTTGC  
TGTACATTGCCATTTGTAAATGGATCATCTGAGCCATCATCATCACAGCAACCCATAAT  
GCTCTCAAGCAAGTCACGTTTCTGAATTTTCAGGTTACAATGCGGATTTGAATCAGCCTC  
TGCCAGCATCAGCACAGCTGTGAACACAAGAATACCTGGTATCTTCATACCTCAGGTGA  
TCTGGATGAAATAACGCAGGTGAAATTCAAGAAAAACGCTTCAGTGCTATCTCGG

>ITLN2-D\_TRINITY\_DN388\_c0\_g1\_i4

ATTGAAATGTTTTGAGGTTTACAGGGTGGGCTAGTGTTTTTAAAAGGCAGATGCAGATT  
CCTGTGAGAAAAGCAGTATCAACAGCAGCATTAAGTGTCTTACTTTATGTATTCTCTTTA  
ACAGGTCTTCTAAAGGATGACGATATCAGGACTCTTCTTCACTACTCTACTGATGCTGGC  
ACAAGCAGGTCAAAATGATATGGAATGCAATCTGAAACTCCCCAAAATGTTCTGATG  
GCGAGTTTAGCGAACTGCAATGGTAATTTTACTAGTGAACCATCCTCAAACAACCTTCTA  
CTCATGGGATGGGAAGAGAAAATACACTGGCCACAGCTGCAAAGAGATCAAGGAAAA  
GTACAACGTCAGACAAGATGGCCTGTACTATCTTACTACTGAAGATGGCGAAGTATATC  
AGACATACTGTGACATGACGACCAATGGAGGGGGCTGGACTCTTGTGCTCAGTGTTTCA  
GAAAACAACATATATGGGAAGTGCACATATGGTGATCGCTGGACAAGCACACAAGGA  
AACAAGCAAAATTATCCAGCAGGAGATGGAACTGGGTGAATCTGGCCACCTTTGGCA  
CTGCAAGTGCTGCAACCAGTGATGACTATAAGAATCCTGGATACTATGATATTGAAGCT  
GATGATGTTTCTGTCTGGCATGTTCCAAACAACACACCTCTCAAGAAGTGGAGAAACGA  
TGCCATTTTGCAGTATCACACAGAAAGCAAGTTTCTTCCCCGATATGGAGGAAATCTGT  
ATGGGCTCTTCAAGAAAATGCCACTTGTCTGGAATACTGGAATATGCCTAACTGACAAT  
GGTCCAGCCATACCTATCATCTATGATTTTGGAGATGCAGAGAAAAGTCTAACCTGTA  
TTCACCAAATGGTCGGAGGGAATTTAATCCTGGTTTCATTTCAGTCCGTGTTTTCAACAA  
AGAGAAGGCTGCTATGGCAGTGTGCTCTGGAGTCAAAGTGACAGGGTGTAAACCCAGAG  
GTGCATTGCATTGGAGGTGGTGGCTTCTCCCTGAAGGAGATCCAAGACAATGTGGAGA  
CTTCCCTGCCTTTGAGTGGGATGGGTATGGAACAGGAGTAGGCTGGAGTGTAACCTAAGC  
AGATGTTGGAATCTACTATTATGTTGTTTTACCGCTAGAAGTCTCAGCTCACAATATTG  
CATGCATCTGTTTTCATGACTACTGTTTTACATCAATTCATACCTCTAGTAACTCAAGTTG  
AATCAGTGTTACTTGCAGTGTATTTCTAAATCAATGCATTGAAATGCAGGTAGTAATGTG  
AATGGAAACAGAAAGCTAACATTTATCAGTCCAATTTTTGTTACTATATGTATAAAAAATA  
ACATAACTATATGTCTTTTAAGAAGTTCATGCCTGCTCCTAGCCATTTTTTATGCTACCG  
AGTTTGTGATATCAGTCTTTTATCCTTATGAGCAATATCCTAACAAACACATTTTGCATT  
AAGAAAGACAGGAAGTATTCATCAGTCTTTTAAAGAGTTTGTGAAGCTTTTGCCTTTGTA  
CAATCAAACCTTCATAATTAAAGA

>ITLN2-E\_TRINITY\_DN857\_c0\_g2\_i1

TATCATCCTTGAAAGGGATTTCTTCTGTACAACTTCAAACAGGCAGCACTCAATTTAC  
AGATCATCCGAAACAATGAAGATACCCAGGTGCCTTGTGTTCAATTGCAGTGCTGATGCT  
GACAGAGTCAACCTCAAATAACAAAGAGTGCAACCTGAAAATTCAGAAAAGTGTCTTA  
CTTGAGAGTATCAATGGCTGCTCTGACGGTCCAACAAATAATCGGGTTACAAATGTCAC  
CCAACAACAAATCCAGCTGAAATATATGGCAAGAAGCTGCAAGGAGATCAAAGAAAA  
GTATCAAATACAGCAAGATGGTCTGTACTACCTAACTACAGAAGATGGTGAGGTCTAC  
CAGACATTCTGTGACATGACAACCAATGGTGGTGGTTGGACACTCGTGGCCAGTGTTCA  
TGAAAACAACATAC

>ITLN2-F\_TRINITY\_DN857\_c0\_g3\_i6

TATTGCTCTACCCACTGTTAAACTCATTCATTTTTATTTCACTAACATGCTGCTATTTCAA  
TACATAATGCCATTAAAGTTATATTTCTGTATGTTTCAGTTTTATAATCTGCATAATATTTT  
GTCCTAATCATGAATTCATATACATTCCATAATTGTAATATGCTTTTATCATATCCTATAG  
AAGAAACATGGTTAAATAACAAATGTCAAAGAATTTGCTTGTAGCATAAAAGAACTTA  
GAATGGGAAAAAATTGAGATAATTTGATGTCAGTGTTTTTAACAGCCATACTCTGCACTTT  
CAAGTCACAGTAGTTTTACAAACAAGCAAGCACATAACAGAGCTTATTGCTGAAACAG  
AATTGTTTAATGCTACCATTTTTAGGGGCAAAATGAATCTTCAAACAACCTGAAGCAAGCC  
AGGTAAGCAGATCTGAAAAATAAATTTAGTAAAAAAGAGGTGAATAGAAGTTCTGGT  
ATTAAAGCTCTTTGTTAAAATTCTAATTTTCATCAAGATAACACAGCAGTGCAAGCCAC  
AACCTGATCTAACAGTGTTGGGAAGTTAGAAACAGTTGTGTAACACACAATATTTGTTGA  
GTCATACTTAACTAACATTTAAATTAATGAATGCAGCTAATCCACCTATGCTATTAGAT  
TTTACTCTACTACCTTACTGCAGCACCGATGAATTCTGAATCTGTTAAAAAATCAGATGC  
ACAATCGACAGGAAGGTCTACAGTTAAAATAAATTGTTTCTTTTGTGGCCTTCTAATGTT  
CTAACAGCTGTTTCTGTTGCCTGTTGTTGATTATGCTGCAGCCTGTTCTCATGCTATAAC  
TATCCTGATAAGGGTCTATGAATTTCTTCACTGCCATGGTGCCTCCTTTTGGGAGTATT  
GGTGAAGATGGAACCTTCTGTTACAGCAGTGCAAGTAACAGAAATTCAGCTTTCTGGTT  
TTTGATTGTGTAATTA AAAAGTATACAGCACTAATGAGTATTCATGAAAATACAAAATA  
AATGTTGGTGAGGAATAATGCAATGCAGATTA AAAAGAGCTGAGTGAAACTGTTATTCA  
CCAAAGTCAAAGTCCTTTAACGGTAAAATATGAGAACAGCTGATTCCAGCATCTCTTG  
GTTACACTAGCACCTTGGCCAGTTCATAACCATCCCATGCAAATCCTGTGAAATCTCC  
GCACTGTGCTGGATTACCTTCTGGGAAAAAACCACCACCTCCGATACAGTGTTTTGGAG  
AGGGGTGAATATAAGTTGATTGTTTTCTCAGCATTTCCAAAATCATAGACAATTGGTAT  
GGCTGGACCATTACTATTAGGGCAGCTTCCAATATTAAACATAAGAGGCAGTTTCTTAA  
AGAGCCCTTGTAGGTTGCCTCCATATCTGGTGAAGAACTTGTTTTCAGTGTTGGTATTGCA  
GAATAGCATCCAGTTTCCATTTCTTGAGAGGTGTGTTATTAGGGATGTGCCATACAGAA  
ATGTCGTCAGCTTCAATGTCAAAGTATCCAGGGTTCTTATAGTCATCACTGGTTGCACCA  
CTTGCTGAACCAAATGTGGCCAGATTGACCCAGTTTTGATCTCCTGCTGGATATTTCTCA  
CTGTTTCCTTGAGTACTGGTCCAGCGATCCCCATATGTGCATTTCCCATGTATGTTGTTTT  
CATGAACACTGGCCACGAGAGTCCAGCCCCCACCATTTCGATGTCATGTCACAGAATGT  
CTGGTAGACTTCACCATCTTCTGTAGTTAGGTAGTACAGGCCATCTTGCTTGACTTGATA  
CTTTTCCTTGATCTCTTTGCAGCTTTTTGCCATATACTTCTGCTGGGTGTGGTGTGTGTGT  
TGTTTGTAACCTGATC

>LGALS1\_TRINITY\_DN18437\_c0\_g1\_i1

ATTTCAAGACATGGCAGAGATAAAGCATGCTACCTTAACTGACCTGGATCTGCGTCCAGG  
CACAGAGATTGAAGTTGAAGGATTTATAAAGCCTGACGCTCAAAGCTTTTCTGTAGAAC  
TGGGAAAAAATGATGACACTGTTCTCCTGAAATTCAATCCTTGTTTTGATTACAAGGGT  
GTTAAAAAGACAACCTGTGTGCAGCGCTATAATTAATGGAAATTCTGTGCGAGAACAGA  
ACATCCAAAACCTTTCCCTTTCAGCAAGGAATGTCAACCAAGATGCTGTTCAAATTCAAT

GGTGCCGAAGGCGTCACTATAACATTTCCAAATAAAGATAAAAATAACCTTCGCTAACC  
ACACAACCATTTGGACAATAACTTATATTACCATCCATGGTAACATCGATGTGAAATGC  
ATCAGGATTGAGGACCAGTGATGTACAATATGACATCTGCTGTATACTACATGCTACAC  
CACATTTGTCAGCTTTGTTTCTTCATAATTATGCTGATTTTTTTAATATACAGATTTGAAT  
AAAGCATTTTATTAACACTTGTTCTGACGGACAGATTTGTTTATAAAAATGAATCTTCATGC  
ACATCTCTGATCACAATACTGATTCTGTTTTATTACTAAATTTAGGGTCCAGATTATAGTT  
GTAGACTGAAAGGTAAAATTACTCTGTTATCTCAGATCACTGAAAATGATGTGCTGTCC  
CTTGCTTATTTTAAATATTTATTTTATCCTTCAGCCATAAGCAGTCATAATTTTTTCCTGGT  
GTTAGTTTATACTAGTTTGGGTATTCTGTGACTATGTGCGCACAATAGAGTAACTATGT  
AGCTACTTGCTCCACATGTTTAACTTACGCTATTTCTTCCAAGTGTTCTGAACATAATCGT  
TGCTTGTAACATGATGTCTTGTTTACTTGTTTGTATAATCTGTAACCCAGGCTGTAACAT  
GGCTCTAGAGGTGGGTAAAGTTAGAAATGAGCAGAGGTGGATGAGGAGATGGAGACC  
TATAGATTGGAGGGCAGAAAAGGGAGGAAGAAACCAGAAGGAAGGGGCTGCAGAAA  
TATGGAGGAACTGAGAATGCCACTTAAGTACTGGGAACAGATGGTAGTACATGAGGA  
GAAAAAAGAATGGGGGCAAATAAGAGAAGAGTATGGGCTTGAAAATAGACATATACT  
GAGATACCGAGGTTTAAAAAGAGAAGAGAGTAAGACAAGAAAAGAAGAGGGACAAA  
TAAAAGCAGAAGAATGCCCAGAGTAGATAAAGGTTCTTATAGAACCCAGAGGAACAG  
TGACAAAAATAATACTAAATTGATATCGAGGGCATAACCAGGGCATAATAATAGGGTAT  
AAGAAAGTGAGTGAACACATGAGACAGACATGGCAAATGAGATGGAATAGGGAGATA  
TCAATAAAACAATGGGAGGAAATATGGAAGCCCCAAGATATGCTACAAAGTCCATG  
AAATTTAGAACTTTTGCATGGAAATGCTTTCACAAGTATTTCTATACATTAGTGAGGCAT  
AAGAGGTTGTTTCCACAGACAGATGAAAGGTGGTGGAGATGTGAGACAGGACAAGTTG  
GAACATGGAAGGATATCTTTTGGGAATGTGAAAAGCTGAAGGGAATTGAGGGGGAAGT  
CAAATAAATATGGGCAAGGGCAAGTCTAAACAATAAAACATTTACAGAAATGGGAAT  
GGACATAGAGATAGACCTGACCTGGAAGGCAAATAGAGAGGTAAGAGAACTCCTGAC  
ACTTATAATAATGGTATACAAAAAAGCAATTACAAAGAAATGAAAAAATAGGGAGGT  
CCCAGAGGTCACGGATCTTCATGATATCATGTGGGATATGCAAAAGATAGACTGCTGG  
GGCTCCCAAGTCCCTAAAAGGGTTAAGAAAAAACGTGGTATTTTGTGAGCATGGAGAA  
AAAGAAGATGAAAAATGACAGTTCCTTTAGTTATTCCTCACAGAAACCACTATGGGAT  
GAATGAATGAATGAATAAATGAGTAAGAGTGTACAATAGAGGGGCGAGACATACGCG  
CTCAGCCTTGACATGTAAATAGTTGGGTAGCAAGGTTTGAAATTAGCT

>LGALS9\_TRINITY\_DN2268\_c0\_g4\_i4

AATATGAATGGTACATGCTTTATTGTTTCATTTGGTCCATGAAAATGTAATTGGTGAAGT  
GAAGCTTTAGGAGGTAAGTGGACAAATGATGATTACTGCTAAAAAAAAAAAAATACATAT  
CTGAAAATTTGAGACATGGTATGACTGGACAGGCATTTACTGTGTTTTCAACAAAAACA  
GGTAGATACAGTAAGGCTTTCATTATATAAATGATACAAAACAGATTATACAAACACT  
GAAACATGAGAGTGTGACTAAACCTGAAATATTCTGAACAGATTTACATTTTTGTATCT  
CTGCTTAGACAATAAGTTTGAACCTCCAAGTTAACTATTATCAACAATTTATTTATTTA  
TAACTTTTGTTTACTGGGAAGACGCCACTGGAATACAAGCCCCATTTTCAGTGGGTGCCC  
AGGGAGAAAAGCCCCACATATACAACATTAAACAAAGACATAAAAAACAAAACATTT  
TAAGTTCCATGGGTACACAATAAGCTTCAACAACCTGTTAACACACATCAGTAAATACTA  
AAAGTTTTACATTTTTTTTTAGAATAAAAATTTATAGAAGTATTTAAGCAATTTATACAAA  
TGACAACGTGCCTACATTTTCTCTCACACTAACATCTGATACATTGTTTAGTAGTTAGTC  
CATAAATGGTAATGGTACTAACTAAGACAGAAGTATAGAAGCTACAAATCATGCTA  
TATGTTTCTAGAACTTATAAAAAATATTCTGAATAATGATTTTCCTTTCAAAAATACACA  
CTTGTAAGCTGGACATTCCCACTTATTTCAAGCTTCTTTATTGACTGAAGGTCAGATACT  
CGATGGTTGAAGTTAAACATGTTTCCATTTACACTGACTCTGAAACAATGATGTTTACA  
GATAATGGAGATCTGAAAACCTCTGCCCTTGGAATATGGGCATTGTGCCATTAGGCCAAAC  
TCCGTTTCTCTGCTCCCCAAGCATTATTCAGAAAACCTATTTGAACTAAAGCATTTTCTC  
CAAATCTTACAGCCAGATGAAATGCAATGTCAGAATTCCTCTTCAGGTCAATACGGAA

GCTGTCAGCATGATGAGGCACTGATCCAGAAATGGCAATGTTTCTTGGTGGATACAGCC  
CCTCTGGTATGTAACTTCATATGGAAGTTGAAAATTAGCTGACTGAGCTGCAGCAGAC  
GGGTAACCGGGAGCTACTGGTGGTGCCGCACAGTAAGTGGGGAAAGCAGAAGCAGTT  
GGTGGTGCCGCAGAGTAAGCGGGGAAAGCAGAAGCCGCCGAAACAAAAGCACCTGAA  
GATGGAAGCACTTGTGAGGCCCCGATGTCCTGAAAAGTTGATGACACTCAGCTGAATCTC  
TCCTGACACACCGATTGTATCCACCCTGGACAGAGGGATCCTGTGTTTATATTCTAGGA  
AATGTACCCCATTCCTGACCATGAAGGAAGTAGTTTGCGCAAGAAAAAGAATTC  
AAAGCGCTGCCCAAATTTAAAGGGCATTTCATATTTCCGCTCTTCTGAACCCCATGTCTC  
ATACTGTAAAGTATTGCACACGACACAGCTCTCGCCAAAGCGTGGGTGGAAGTGAAT  
GCAATATCGGAACGAGGAGTCACATTGGTTCCACACTGGAAATTCACAGCAAACCTAT  
CACAGTAGCTGTTGACCTGTCCTTGTACTGCCACTATTTTTCCATCATAAAGACCACCAT  
GAATGGCACCAGTAAAGGGAATTGGGGGACTGTAGAAAGGCGCCTGAGTCTGAAACC  
CCGACATTGTTTCGTACAGCCA

>CLEC2L-A\_TRINITY\_DN98733\_c0\_g1\_i2

GGATTTAAGTTTTATTTTATTTTTCTGCAGTGTCAATTTATAACCACATTTGAAAACATCCT  
TAAAAAGCAAACAGATATTGAAAGCTTTATAGTCTTAGTCTTTATTTTTATGTCATGCTG  
TCCAGTAGAGCAAACCTGTTTTGTTAAAAAAAAGGTTGCTTCATTAGGATAGCTGTACT  
TTACCATTTTTTTCAATCATTTTACAAATATGATATTGTGACTCCCTTGACAGAGCTGATA  
AGACAGCAAAAAGCTATACCTAAAAGTAATCAGAGGTACATTCTTTGGAGAAAGAGCA  
CTCTACTGATATATCATCATTTAGTTCTTTGGATCAGTACTGTCCAGTGTTGCTCTGGCAG  
ACAAGCCTTCATCCCTTCACATATACATATTTGTAGCAATATCATCATAAACGTATATCG  
CTTGCTCTTATTGCAAGTGGTTAACTGCTTTCTTCACACAAATATAAGGAAAGAGTGCTG  
AGCAATGACGATCAAATAGCATATCAGGTTCAATAGTGATGCATTTGTGCTCAGGACTA  
ACACTTCCTCTATTGATTCTAGTATCATTACCATCAATACTGAAGAACGTATCAATCCAG  
TGAGCTTTATCTTTTACAAATTTTGCTGCAAATTCACACATGTCATTGTTTAGATGTGTAA  
ACAATGATGCATTCTGAGAAGAACATGACTCTTCTGAGGCATTGTAGTTTTTTTCTTCTTT  
GGAAAACAGGTAGCATTTGCTTTTGTATCCTATCCAGTGTTCTGGGCACATATAGTAATT  
CTCTGTACCGTTACCATGTGCCTCTCTGAATAGTCCTCTCTGATGTTCCATCTGTGCATTA  
TTTAACTTTTGAGTATATTTATGAATAAGCAGCACTTTCCACGCAAATATCAAGGCAAG  
ACAGGTGATGCTGAGTGCAGTCATGGAGTAATAACAGAACAGCAGCTTGCCCATCTCT  
GAGCTGTAGAAGCTCTGTTGTCCAATTCCACCTTTAATTTTTTACACTTGTATCTTCGTAG  
CTTTGTCAGTGT

>CLEC2L-B\_TRINITY\_DN25632\_c1\_g1\_i7

AGCAATATGATGGCCTTGAATAGACCTTGCAAAAATTCCATCCATTCTTTTTCTTGAGAA  
GTCTGAGAAGAGGATGTACTTTGTCTTCTGTTTCCTCTTAGGTGTTTTGTGAGTTTCAT  
GAAGTGAGGCAGATCAGACCCCTGGAGTACCTATATCAAGGCACTAGGCACATATTCC  
CTGATTATGACTTCAGGTGTGATTTTGGTCCCTCTGAAATAATCAGCCTTGGTTCCTCCTT  
CTTAATCATATCAGTATGATCAGTCATAACGGATGTGTGAGAATCAGATGCCATACTTT  
CTGCCAGCAGGATCACTGTACCAGTAGCCTGAGAAGAAGGTGGTTGTACCATAGGTTT  
CTGAAACATCTTTAAAAGGTACATCTGAGTCTGACTGGGCAGAAGACGTTTCAGGCCTA  
GGCCTTTTGAAATGAGTCAGCAGGCTGTCTGATAGTGCATATTGTGCCATTTTGTACTGA  
GCGAGGTGTTTCAAGCTCTGAATCTCTAACATGTACTAAGAGAGGACAAATGTGTATGC  
AGGGTTTTCGGAACAAATGATTCACAAATCTGACACTTCTGATAATTGTGTTTACGCTC  
ATGACAACACAGGCACTGGGAGTGGAGGTCCTTATAGGGAATATGGCCTACCACAATG  
ACAATTCCCTCTCTTACCTGACCAATAACAATTCTGAACACACAAGAAAAATGAGGG  
TTCCCAATGGAGCATTTATTTGTATAAGTGAAGGCCGAGGTAACACTGAGTAATATGTG  
GACCAACAGACCGACAAGTGCGAGACCTACATTTGGACTGGTGCAGAGATAATCTTAA  
GGATCTCACATTTGTGTGTCTACCCATATACCCCATACGCCAGTGAGCTTGGGTCATACA  
TCAAACGTAGGAGCATACATGAGGTTTTTGGCTTTGGTATACCATCCAGACATCAGGTTA

CCTCGAAGAGAGAACCCATACAACAGTGATCTAAAGAAGGAAATCAATAGAGATAGA  
GGAAAAACATCATCATAATGCCAGAACTCACTAGAAGCAGACCCACATGTGCTCAAAT  
AATCTAAGCTAAGTCACATAATCAAGCCTGCTAAAACAACCACATGCACACACCACCA  
CAAGGCTCCATTCTGTTGCTGTAGTATGGAAATAAGCAATGGGAAGCTCAAATATTTAT  
ACTTAAGATATATTCAATTTTTAAATAAGTAACGTTAATACTATTCAAGGTCAACAGAAT  
ATCTCAACAATCTCTCTACACTTCTGCTTATCATAAAAGTTTAAAACTGAACTGCTACATT  
AGTAAGAAAGCTCCCCAGAAAAACAAACATCGCAAGTTACAAGCAGGTTACACACAAT  
TATTACAACCATGTATGTCAATCATTTTTTGGATACAGTAGATTTCTTTAAAAAAATATTC  
TGTCTAGACATTTTCTGTACTTAAAGTGCATGACAGTCAAACCTACACCATAACTATAT  
ATTTTTTTGCTTAGTATTAGTTGTTTAAATACTTACTAAAACATATACACCATAACTTCAA  
GAACAATATGAAACTTTTTTTTTCTTTACATATAAATTATCTGAGTGTACAGGTCATTAA  
ATCAGTGAGAGTAAAAAGAAAAACACTTCAGTCAATATTTCTCTTAAAATGTCTTTCAT  
GATGTGGTGTGATGGGCAGAAAACATTTCTGAAAAGACAAACAGCCTTCTAAACTGGT  
CGTGCTTCCTTGCCACAGTGGTTAGCATCCCCAGCAACAAACAACGCTCTTTGGTTTAGT  
ACCTCAGTGATTCCATCTCACAGATCCAAAGTTGATGGATGTTACAATCTAAAGACAAC  
AATGTAGTCCCTCTCTTACTCCACAGTTGAAATCAGGCTTATCATCTCCAAGAACAGT  
GCTGCTGACATTGGAACCATCTATCCACTTCCACTGCTTGTGCATCAGATCTTGTGAGTCC  
AACCCAATAACTAGCATTAGAAATACTCAAAAAATCCAAGATATTGGTGCCTTCAAGT  
ACAGCCAGATCAGAGTGCCGAAAATTACACCACTCTCGACTGGTGTTCAGCTCTTGCT  
GCTGTTCCAAGATGCGTAGAAGCATTTCCTTGTGCAGAAACAGTCTTCTGGACAAA  
GTTACAGATTCTTTTCCACTGCTATAGGAAGTGCTACATAAGCGTAGCAAAACGTCT  
TGAGCTTGAGCAGCAGGCAACTCTGTCTCATTGTTGAAAGGAGCGAGACCCA  
GATTCCAACAAGGGGGCGCAATTACCTGCAATATTATAATAAGGATAAAGAGTGCATT  
GAAAACAGCGGATATCCAGCACAGAAACCGAAGAGACCAGTCTTCATCGTCTTTCTTTT  
TAAATGGAAATGGAGGTTCCCTTGATTCCTCTCTAGGCAGAGGAGACTCTAAAGTAAAG  
TGTAAGTCTTCTGGGTCTCATTCTCTGAATCTCCAGCAACTTCATCAAGATCAACCTGA  
GAAACGGCAGAATAGTTTCTTCTTATGGAAGCAAACTCATACTGATGGTGGCTTCTTA  
ATTCTGAAGTGTTAATTTTCGGATGGAACACTGAGCTAGTCTTTCAGACTTAAGACCTC  
TAGATTTTCTCTCCACAAAGCTGAAGTCCCTGAAGAAATCTGGCAAGATGCAAGTTT  
ATTCAGCTTCACACTGCAGTCTTCTTACTCAAAGGATTTTGCTCAGATTGTTAACTCAG  
AAAATGAGCCACTCAGAAACCTGTTATAATATCAAACCTCACCTAACTCGACAGTTTC  
CGGCGTGTAGGATTACTAATTCTCACATCGCACGCTCTATCTGTATACACTGG

>CLEC2B-A\_TRINITY\_DN2263\_c0\_g2\_i2

AACTGTCGAACAAGTTTCGGATGATGAGAGGTTGAGAACGATATATACGTGTGGTTATT  
AAGGAAATGCAGACTTTACTTGAGGAAGCATGTTTCTGCAGTGCTTGTGCATGTGCAGGG  
GAGAGCAGGAAATTGGAAGGAGGACTACAACCTGTTGCTCTCATATACAGCATTAGAAA  
TGAATTGTCTCCTTCTAGTGACAGCTGTGCTTGCAAGGCTCCATATAAACTACAATA  
AAACTTTTGGATTTTGTAAACATGATTAGAGCAAGGAGCACCGAGAACCAAAGAACC  
ACTCAGGATGTCTTCATCTGAGAAGTCTAGCAGATCACTCGCAAACCTTAAGTTCAGATA  
TTTCTTTCAAACATTAGTGTTTGTGCTGACTGCAATACTATCAATATTCCTTTTGT  
AAGCTATATTGCGCCTCACTGTGAGATGATTTATAGAAAAAGTGTTCGACTACAGATA  
GAGCTGCAAAGGACTTGACATCTTAAACAAAAATGAAAGAGCTTTGCCATGAATCAAA  
GGCTAATGATAATGAAAATGATAGAGCTGCAAAGGACTTGACATCTTAAACAAAAATG  
AAAGAGCTTTGCCATGAATCAAAGGCTAATGATAATGAAAATGATAGAGCTGCAAAGG  
ACTTGACATCTTAAACAAAAATGAAAGAGCTTTGCCATGAATCAAAGGCTAATGATAA  
TGAAAATGAAGTTTCTTGTAAAGTTGTGCTCATGGATGGATTGGAGATCCAAAAAACT  
GCTATTTCTTCTCAACTATAGAAAAAGATTTCAAGAGCAGTGCAGAGTGGTGTCTTCA  
AGACATGCATCCCTTGTGCTGATTAAAGATAAGGAGAACTGAACTTCATAAAGAAGT  
GGGCCTACAGCAATACATACTATATTGGACTGAAGCGAAATGATATGGGACAATGGAT  
GTGGGCTGACAATACATTCTTGATAAAACGAGATTCATACTGGAAAACACTACTGAA

CTTAACTGTGTTTTTATGGAACAAGATAAAAATTCATCCAACCTTCTTGCAACTCATATCAT  
CGATGGATATGTGAAAAACAAGTTACAAGAATATGGTGACCAAATAATGTTAAAAAGT  
GCAAAAAAAAAATTCTGGCTCTGTTTTTTTTTTTTTTTTTTTATTG

>CLEC2B-B\_TRINITY\_DN2263\_c0\_g2\_i4

AACTGTGCAACAAGTTTCGGATGATGAGAGGTTGAGAACGATATATACGTGTGGTTATT  
AAGGAAATGCAGACTTTACTTGAGGAAGCATGTTTCTGCAGTGCTTGTCATGTGCAGGG  
GAGAGCAGGAAATTGGAAGGAGGACTACAACCTGTTGCTCTCATATACAGCATTAGAAA  
TGAATTGTCTCCTTCTAGTGACAGCTGTGCTTGACAGAAGGCTCCATATAAACTACAATA  
AAACTTTTGGAAATCGCTCCCAAAGTGGCTTTGCGGGGTATTGCAAATTTCCATGGAGGT  
GTGCCTATTAAATTTTCATTGGGCTGAATTTTCATTGAATATATTGGATTGTGCTTTAGAAAC  
CGTGGCCCCGCGACGCAAATGGTTTTGTAAACATGATTAGAGCAAGGAGCACCGAGAACC  
AAAGAACACCACTCAGGATGTCTTCATCTGAGAAAGTCTAGCAGATCACTCGCAAACCT  
AAGTTCAGATATTTCTTTCAAACATTAGTGTTTGTTGTGCTGACTGCAATACTATCAAT  
ATTCTTTTGTAAAGCTATATTGCGCCTCACTGTGAGATGATTTATAGAAAAAGTGTTTC  
GACTACAGATAGAGCTGCAAAGGACTTGGACATCTTAAACAAAATGAAAGAGCTTTGC  
CATGAATCAAAGGCTAATGATAATGAAAATGATAGAGCTGCAAAGGACTTGGACATCT  
TAAACAAAATGAAAGAGCTTTGCCATGAATCAAAGGCTAATGATAATGAAAATGATAG  
AGCTGCAAAGGACTTGGACATCTTAAACAAAATGAAAGAGCTTTGCCATGAATCAAAG  
GCTAATGATAATGAAAATGAAGTTTCTTGTAAAGTTGTGTCCTCATGGATGGATTGGAGA  
TCCAAAAAACTGCTATTTCTTCTCAACTATAGAAAAAGATTTCAAGAGCAGTGCAGAGT  
GGTGTTCTTCAAGACATGCATCCCTTGTGCTGATTAAAGATAAGGAGAACTGAACTTC  
ATAAAGAACTGGGCCTACAGCAATACATACTATATTGGACTGAAGCGAAATGATATGG  
GACAATGGATGTGGGCTGACAATACATTCCTTGATAAAACGAGATTCATACTGGAAAA  
CACTACTGAACTTAACTGTGTTTTTATGGAACAAGATAAAAATTCATCCAACCTTCTTGCAA  
CTCATATCATCGATGGATATGTGAAAAACAAGTTACAAGAATATGGTGACCAAATAAT  
GTTAAAAAGTGCAAAAAAAAAATTCTGGCTCTGTTTTTTTTTTTTTTTTTTTATTG

>CLEC2B-C\_TRINITY\_DN2263\_c0\_g2\_i7

AACTGTGCAACAAGTTTCGGATGATGAGAGGTTGAGAACGATATATACGTGTGGTTATT  
AAGGAAATGCAGACTTTACTTGAGGAAGCATGTTTCTGCAGTGCTTGTCATGTGCAGGG  
GAGAGCAGGAAATTGGAAGGAGGACTACAACCTGTTGCTCTCATATACAGCATTAGAAA  
TGAATTGTCTCCTTCTAGTGACAGCTGTGCTTGACAGAAGGCTCCATATAAACTACAATA  
AAACTTTTGGATTTTGTAAACATGATTAGAGCAAGGAGCACCGAGAACCAAAGAACC  
ACTCAGGATGTCTTCATCTGAGAAAGTCTAGCAGATCACTCGCAAACCTTAAGACAGTAAG  
CTATATTGCGCCTCACTGTGAGATGATTTATAGAAAAAGTGTTTCGACTACAGATAGAG  
CTGCAAAGGACTTGGACATCTTAAACAAAATGAAAGAGCTTTGCCATGAATCAAAGGC  
TAATGATAATGAAAATGATAGAGCTGCAAAGGACTTGGACATCTTAAACAAAATGAAA  
GAGCTTTGCCATGAATCAAAGGCTAATGATAATGAAAATGATAGAGCTGCAAAGGACT  
TGGACATCTTAAACAAAATGAAAGAGCTTTGCCATGAATCAAAGGCTAATGATAATGA  
AAATGAAGTTTCTTGTAAAGTTGTGTCCTCATGGATGGATTGGAGATCCAAAAAACTGCT  
ATTTCTTCTCAACTATAGAAAAAGATTTCAAGAGCAGTGCAGAGTGGTGTTCTTCAAGA  
CATGCATCCCTTGTGCTGATTAAAGATAAGGAGAACTGAACTTCATAAAGAACTGGG  
CCTACAGCAATACATACTATATTGGACTGAAGCGAAATGATATGGGACAATGGATGTG  
GGCTGACAATACATTCCTTGATAAAACGAGATTCATACTGGAAAACACTACTGAACTTA  
ACTGTGTTTTTATGGAACAAGATAAAAATTCATCCAACCTTCTTGCAACTCATATCATCGAT  
GGATATGTGAAAAACAAGTTACAAGAATATGGTGACCAAATAATGTTAAAAAGTGCAA  
AAAAAAATTCTGGCTCTGTTTTTTTTTTTTTTTTTTTATTG

>CLEC4E-A\_TRINITY\_DN90481\_c0\_g2\_i3

CAGTAGGAAGAGACATATCTCAACACGTATCACCCAAGTAAGATTTGACAAGTGTTTC  
ACTTTTTATTTCTTATCAGGGGACAGCAGACTATTTAAAAAAAAGTCATATTGCCCTCTT  
CACACAAAATACCCTATTGATGCTTTCTCACAAATCCAGTTATGTTTTATTGAGCATTTA  
ATGTCAAGCCATGTTCCGTTTACTTGCAAAACAACACAGTCATCCACATTTGACACTGC  
ATCCTGGTTGTTAGGTCTGCCTTGTGCCCAGAACTTGTCTGTGGCGGAAAAATCAGTGCC  
ATCCACCCACTGAAATTTGCCTTCTACTGTCTGGTCACTAAGTCCAATGAAGTATGTTTT  
ACTTGCAAGGGAACCTCTTCAAAAAATCCCTGTTCTGCTCCATCATTGATGATAACAAGCT  
CAGATTTTCATAGATATGCATCTCTTATAAGCAGTATTCCAGTTTTTCAGTCTCTGTAGAGA  
AGTAGTAACATTTTTCTTTATATTGCTTCCATGGGCTCGAGCAGGGAGAACATAAAAAAT  
CCACTTTTATTGGCAGATGTCTTCTTGACAATGCATTGGAGAGGATTTTGCTGTCACTC  
TGCAGGTCTTTGATGCTTTTGGCTTGACCATCATTTTTATTGTGGAGTTCAGAAATTTGGG  
ATGACATCTTCTCCTCCAACGTATCATTTTCATCAATCAGTGCATCATATTTGCGGTATC  
CCACTGTGAAGAATGCTATAATCAGCACAAAGCAGATCATTAAAAAAATGACTAGTAT  
GATAAGGAGCTTTGCTGGCACCCTCTCTCCTCGCTTTCTTCATAGATAAAAAATGCTGA  
GTTGTCTGGACTTCCTCCATCTTGTTTTAGTGGGTACTTGAAGTATCTGGCTTTGGAACA  
GGAACATCTAAAACACAAATGTCATTCTTTCTTTCTTTCTTTCTCCAGTGGTATCCTTA  
TTGGGGCGTTCATGTAAACGTGTTCCATCTCCATG

>CLEC4E-B\_TRINITY\_DN68583\_c1\_g1\_i2

GTGTTTCAGCAATACACTGTGATGCAGAAGGAAATGGCACAATACTTGCAAAGTTTTTAG  
AACACTTGTCCCTTTTCATTAAACATTTAAATACTAAAGAGCAGACATGATTTATGAAGA  
GCTTAATCTTCCAACCTCAGGACACTTACAATACAATCGAGCAGCTTGAGACTGAGAGA  
CAAGGGAAAAGAAATGACACCAGGACTGAAGAAAGCTCCGGCAGTACAAGATGATAAA  
GTGAAGCACAACAATGGATGCACAAAGATGCTAATTACACTGGCTGTCACAGTGATCA  
CCCTGCTGATAATAATTATAATCTTAATTATTCTGAATCTACAGATGTCAGAACAGATA  
ATTCAGTACAAGAGGTCATCTGTGTTCCCAAAAATTACAATAATGACAAATGGAGGGA  
GTTGTTTTCTTATCATGTCCAGATGAATGGCTAGAGTTCAAACAGTCGTGCTACTTCTTTTC  
AAAGGACAGCTTCAATTGGAATATGAGCAGATATGCCTGCATGGCTAAGAAAGCTGAT  
CTGGTGGTGATTACCAGTAAAGAAGAACAGGACTTTATAAACCATCACTATATTGACAT  
GGCCTGGATTGGTCTAACAGATAATGAGCAGGAAGACATTTGGAAATGGGTGATGGC  
ACACACTATGACAACAAAACCAGCTTTTGGTGTCGTGGAGAGCCTAATAATGCACTGGT  
GCACAATACTGAAGGTGAGGATTGTGCCATGCTGTGGAATACTACATCATGTCACTTAG  
GCTGGAATGATTAACTTGCCAAAGAGACTTGAAGAGAATTTGTGAAAAACAACCTCTG  
CACAGTGCTTATGTAAACAGTGGCCTATGCAATGACTTTGACCAGCAGAAAATGTGAG  
AAAGTATGTATGCCGGTGAAATATTTGGCAGTAGCTGCCATTTTATTTACACAACCTCAT  
TAACAACATTAACATCAATAAAATTTGTTACCACAAATAGTTAGTGTCTGGCCTGTAAT  
GTTACTTTATTCAGTCTTGACCCACTTTTAGTCTGTAATCAGTGACATGCAAAAAGTTT  
TTAGACAGTATGCTATCAGTTTATTTTACTGGCATTATCCTGGTTGTATTTCTCTACAG  
ATTCTCAGAGTTGTTATTGTACTTATGATATACAGCACTTTTGGCTTAGTTTAGTTACTGT  
TTTTTTTTTTTTT

>CLEC4E-C\_TRINITY\_DN46240\_c0\_g2\_i1

GAATGGAAGATGAGGTTTACAGGATTTTTATAATCTCTTCCACAATCAATCATACTTTTG  
CTTTAAAAGGCCAAATGTACTTATTAGGTTAACAGTTCAAGAGCTAATATTGTTGAAGTT  
GTGTTGCAAAATAATGATATGACAGCTTCTAAGTAACTGCAGTGAATCAAAATAACTTT  
TTCAACAAATTGCCATTGTACCATAATAAAATGCATACATTTTTAAATAACAGCAGAGA  
TAATGATAAACTCAAACAAAAAAGTTCAGTACATAGTTTTTCCTTCAAAACCTTGTTCT  
GTGACAACCATTTTCTTCATGCTGACATCCACAAAAGTAACTATATAGGAACTATGTGA  
ACCACTAACTGAAATAATGAAATAATATGTTACTACTGAAACATTAGGAGGATGGTTCT  
GTATTTGTCTTATCAGTCTGACTTTGTAAAAGTTAAACTATTTAAATAAACAGTGTTTAA  
GCACATGTTGTTGTTTGCTATATAGTCAGCCAAATCAACAATGAAATGAAGCAGATTTA

TAAAGAGTTGCATTTGATCTGTTTTTCACAAATAAAAATTGAAGGACCGTTGGCAGTTTTTC  
ATCATTCCACTCCAAGTACAAGGAGGCCTAGTCCAGAGGGCTGCACAGTCTTCACCCC  
TGTGATTGTCACCCCTTGCATCATTAGGTTACCTTTGCACCAAAATCCAGTTGAAATGT  
TGTGTGGTGTTCATCTATCCAATGCCATGTGCCTTCCACACCTTCATCAGTTAAGCCAA  
TCCAGTAATTGTTTCTACACTTATTTTTTAAGAAATCCTGCTCTTCCTTGTGTTGATCACT  
ACTAAATCGGCACCCATTTGCTGACAGTATTGTCTGCTGCCGCTCCAAGAGTCAGTGGA  
AGTGGAGAAGAAATACAGGGACCTCTTGAATAAGTTCCAGTTTTCAAACAAGACTGAG  
TCAAGCACACAAAGATGTCCAATTTCCGAGGGTATAAAGTATCCACTTTTTTAATTCAGG  
CAGCGCTTTTGATATTGGGCTGTAGTTACTAACCATCTCTTGCAATTTTCTCTGTTTCTTGTT  
TAAGAAGGTGTGACATTTTGTTATAGTTCACGCTTAGAAGAATAGGGGATGCAAGCAG  
ACATGTTGTAATGAACAGCAGAACAATTATCAAAGACCATAGTATGGGTTTTCTCATTTA  
ATTTATTCCATAGTGTCTGCCCTGCATGAGAGTTTAATCCAAATACATTCTGTGCAGTGG  
CTTTATCCATCTCAGGTTCAGAAATAGCTGCATGGTCATTTTCAGATTCAAAAAGCAAA  
GAATTATATCGAGCATCATATTCCATTGCTGCAAGTTCTGCTGCTTATTTCTCAAATAA  
CTCAGTGTTAGTGA

>CLEC4E-D\_TRINITY\_DN23661\_c0\_g1\_i1

AAAAATATGATTTGGATGTTATTATTTCAACAGGTTTATTTTGTATTTACACAAAGTTCTT  
CTTAATTTTTATATACAGTTTGCTAGGCTACCCAAAACAGTTCTGCATGAAGAACCTAAT  
TCCCCATTTTTAATTTCTGTTGCATTCACTTTAATGTTATTCTGCATTATAAAAACTCTAT  
AGCAAAGTAATTCCAAAAATAGGAAAAAGAGGAAAATGTGCACAGGGAACCAATGTG  
CAGTTGGAGGGGCTCGGTATAATGGTGAAATTGCTTTCTTTTCAAATACCATTGACTTAC  
AACAAATAAAATTAACAATATTTACAGATATCATCTATTGCCACATTAGCATGAATC  
ACGTAGTTTTAGGTATGCCTATGGATTAGAAATTATGTCATAAAGTCATGGTCAGCAAG  
AGTTTCTTCCAGTGAGATTAAGTCTTGTTAGTTTCTGACTGGCAAGTTTLAGCCAACTG  
ATGATAGTCATGTCCACATTAGCATGTCTGCAGGTCAACAGCTTGAGCCCCACTCCTGT  
CTGAAATGATTCCTTGCACTCAGCAAGGATGGTAACCAGCAGTCATAACTCAAATGGTC  
ACACACTGATGATCGTCCCTTTTTTTTTCACAGATGTATGAATAATTTAAATGACATGACA  
AGTCATATGTGATAAGTCCAGAAATTGAAGAAATGATTATTGCAGCACAATCCTCTCCA  
TTAGAATCGTGACGCTGGCTATTATCAGGCTGTCCAACATCCCATGCCACTTTTCTTTTG  
CTAGTATCTTTGCCATCGACCCAGACCCATTACCTTCTTTTCGATATCTGACAATCCA  
ATCCAATACTTTTCACTTTTATTTGCAAACCAGCTAAGAAATGCCTTCTCCAGGTCATTG  
TCTATGACAACATAATCAGCACTCTTATTCTTACAGTCCTCCCTGCCTTGCTCCCAGCTT  
CGTTTGCTTGCAAGTTGAGAAGAAGTAGCAGCTAGTACTTAATGAATCTCTATCACTTGG  
ATGGAATGCTGTCCATCCAGGTGGGCAGATCTGACATCTGGAAATTGCACCACGTTGCA  
CACAAAATGAATCTTTCAATTCAGAAAGTGCCTTAGAAAGAGATTGCTTGTGAGATCTC  
AGCTGGAATATTTCTACATCTTTCTCATTCCGAGGTCTAGAAATTTCACTGCAGTTGAAA  
GGAATCTGTTTGACTTTTGATGCTTCATTCAACTCTGCAGAAACAAAGCTGAAATTTTCT  
GAAACCTCCCTGTGTTGGGCAGTTAATTTTTCATATTGAGCCGAGAGTAATTCTGCTTTC  
TCTGCCTGATGAGAATGTTGCTTTGATGCATTGTTATACATCGTCGCAATGGCTACAATC  
CCAATCAGCAGGATGCCGCAGAGAAGGAGAAAGGCTGTGACAATGAATCTGGTTCGCC  
AGGATATCTTTGATGTGTCCGAATCAAAACCAAAAATGCCTGTTTTACCTTCCGCTGCTG  
GCATTTGTATAGGTGTGTAGATGTGCTGTGCTTTGGTGGATTGAGTTTGTGTAGGATT  
CTTCATTAAGTGGTTGCAGTCCCTCGTATATGTGCTCATTGCTTGTGCTTTCTCTGG  
CTCTTTCTTTCTATCTCCTTCTTCCATCGGGACTTCCATCCCCTCAGGTCTCCCAAACCCA  
TCCTACCAACCTTGCTGGGGCTGTATGAGACATGGGGATCCCGTGGTCAGGAGTCTGT  
GCATCAGCCTGGTGGGTGCATGTGTGTGAGCTCCATCCCATCATGG

>CLEC4E-E\_TRINITY\_DN383\_c0\_g1\_i7

CCTTATCCCTAACTACTTAGTCGCAGATATAAAACTTAAAAGACATTAGCAAAAAGTA  
GCTTCAAAGGCAGGTGACAGAACTTACAGTAAGATTTATTCATCAAATTTATTTTTAAGT

ATTAGCTAATTTTTGCATTTGATGAACATTATGGAACAGGAGAAGACATACCAGGAGCT  
TCAGTTTGCAAATGAAAATATTTACTCGGAACCTTGATCAACAACAACTAAGAACTA  
GGAGCAGAAAAGACAGCTCCAGAAACACAAAAATATGTGGCTAAGTATTGCAAACAA  
CCAAGAAAATTGTTAATCACCTCCATTATCACAGTGTTTCATCCTGCTGGCAGTAATCAT  
AGCTGTGATTATTTGTATTTACCAACTTTTTCCGGTGCAGCCCCAGCCCAGCACATCTGT  
CGCCTATGGCCCCATGACTGGAAGTCCCCTTGATGAACATTTTAAATGGCATAACAGCAA  
ATACTGGCAGAGTTAGAGCACACACCAGCCAGCAACAGCCAGCTACAGGCATTTCTTC  
AACTTGTCTTTTAGAGGATGCAAAGATGTTTCAAAAGAGCTGTTATTACTTCTCAAACA  
CAAGTTTAGAATGGAATGGCAGTAAGAAATGGTGTGAAGACAAGAAAGCTCATTAGT  
AATAATCAAAAGTGAAGAAGAGCAGAAATTCCTAAAAGACGAAGTTACTAATTTTAGA  
AACACCTTTATACAAAAACCTACAGGTCATTTTTCTGGATTGGACTTACAGATAAATTA  
AAGGAAGGAGAGTGGCGCTGGGTAGATGGCACTATCTGTGACTGCAACAATACTAACA  
AAAATAAAAGATACTGGAGGGAAAAGGAGCCAGACAACCTGGAATAATTTAGAGCACT  
GTGCTGCACTTGCTGAGAATGGTGAAGTGGATGGGAAATGTAAGTGGACTCTCAGG  
TGGATTTGTAAGATGGATGCTACGATTTTCTCTAGCTAATCAATTTTCTCAATGACAGTT  
GTTTAAATGTGACACTGATGTTTGATCTAAACAACCATTTGAACAGTCTTGAACATGTTA  
ATCATTCAATGATTATTTAATTATTATTTGGTTTGTTTCATGAAAGACCCAAGTAATATTG  
AGCACATGGACAATAATTCTGCTGTTGATGACTTTCTCCATTATTTTCATGTATATGTTTAG  
TGTTATATGCCTATATTCTAATCTCTAATGGATTCATATTAAAAGA

>CLEC4E-F\_TRINITY\_DN9366\_c0\_g1\_i9

TAACTTTATTTGCAACTATTGTTTTCAAGGCAATGATTTTTTTTTTTATTTTGACATCCAC  
AAAAATAACCATAAATGAACGATGTGTACCATTAACTGAAATACCAAATGTAGTACAT  
TATGTTGAATTAGTAGTAAACCGTTAAGAAAAAAGATAAAGATGCCTTATTTGTCTTA  
CCAAGCTGACTGTGTAGAAGTCAAACACTTTATAAAGGACAGTGCCAACATGTTTTGCA  
TTATTATCCCTTACTTAGGAAAATCACAAAGAAATTAAGTGAATTTATGACAAGCTACA  
TCTGGTTGGTTTTTCACAAATAAAATGAAACAAGGACTGGCAGTCTTCATCGTTCCATTT  
TGACTGACAAGAATCCACATGATCGCACAGTTTTCACTATTGGGATTGTTACCCCATG  
CATTATTAGGTTCACTCTTGACCAATGTCCAGATGATTTACTTTGAATTGTTCCATCTAC  
CCAACGCCACACACCTTCCTCAATTTTCATCAGTCAGTCCAATCCAGTAATCATTTTGTT  
GTTTCTTATAAAGAAAGTCTGTTCTTCAGCATTGTGTATCACCCTAATTCTGATGACAG  
ATCTTGGCACATTCTCCTGGCAGTAGCCCAAGTTACAGACTTTTTGTAGTAGAAGTAAC  
AGCTCAGCCTAAATTGCTTCCAGTCTGAAGGGCAAGGTTCAATCTGCTTTCTTTAGAGA  
GTTCTGTGAATTCAGTATTTTTTGTTCTGATCTGCCTTTGAAGGTTTTCCGTTTGCGTTAAC  
ATGCTTTGAAAGCTGTGATTCAATAAGAGAAGGTCCTGGTTTGCTTGTCTAGTTGTTTT  
GACTTCTGTAAATATAGAATAGTCATGAAGATGCCAATTGCCACCAGGGATAAAATGA  
GCATCAGGATGAATAACACCTTACAGTTCCACTTTGTTTCTTCTTTGTGCTGTTAGGTTT  
CTGCATGCCTTCTTTGGCACTTCGTAAAATTTCTGCTTGGGGATTGTTAGTTTGTGCTA  
TTAATTCTAGAATAAATGTTTTCAATTTCTACATTGAAGCTCCTCATATGTTGTATTTTTTC  
CATGATCTTCAAAAATTTTAGAAACACCTGAACTGACAGAGGAGCAGCGAAAGGCTG  
TGTACCAGCATTTACAATGAAGAGGGAACCTGTGAGGCACGTTCCCCAGTAGAACAAA  
TAAGTAGTGTTAAATCCAGAAGAATACGTAAAACAACTAGTTCCTTAAAGAGTTTCGT  
TTTTATTAAACAAATGCTGATTAAAAAAAGGTAGTTTAGCAC

>CLEC4E-G\_TRINITY\_DN383\_c0\_g1\_i3

TCAACGAAAGGTGACAGCACTAATAACAAGACTTATTTATCAAATTTATTTCAAGTGG  
TGGTAGTTTGTGTCATCACTGAGCATCATGGAATACGAGAAGACATACCAGGAGCTTAA  
GGTTGCAACTGAAGACACTTACTGTGAAGTCAATCAACAACAAACCAAGAACTCAGA  
GCACAAAAGACAGCTCCAGAAACACAAAAATATGTGGCTAAGTATTGCAAACAACCA  
AGAAAATTGTTAATCACCTCCATTATCACAGTGTTTCATCCTGCTGGCAGTAATCATAGCT  
GTGATTATTTGCAGTAAGATAATTCCTGAACCTGCTGTTTTAAAGGCAATTCCTCAACT

TGTCCTTTTAGATCATGCAAAGACGTTTCAAAACAGCTGTTATTACTTCTCAAACAGAAAT  
TTAGAATGGAACGACAGTAAGAAATGGTGTGAAAACAGAAAAGCTCATTAGTAATAA  
TCAAAGGTGAAGAAGAGCAGAAATTCCTAAAAGACGAAGTTACTAATTATGGAAACA  
CCTTTATACGAAAACCTAAAGGTCATTTTTCTGGATTGGACTTACAGATGAAGTAAAG  
GAAGGAGAGTGGCGCTGGATAGATGGCACTAACTGTGACTGCAATAGTAATAACAAAA  
ATAAGGGATACTGGAGGGAAAATGAGCCAGACAACCTGGAATAATTTAGAGCACTGTGC  
TGCACTTGCTGAGAATGGTGAAGTGGATGGATGGGAAATGTAAGTGGACTCTCAGGTGG  
ATTTGTAAGATGGATGCTACGATTTTCTCTAGCTAATCAATTTTCTCAATGACAGTTGTT  
AAATGTGACACTGATGTTTGATCTAAACAACCATTGTAACAGTCTTGAACATGTTAATC  
ATTCATGATTATTTAATTATTATTTGGTTTGTTTCATGAAAGACCCAAGTAATATTGAGC  
ACATGGACAATAATTCTGCTGTTGATGACTTTCTCCATTATTTTCATGTATATGTTTAGTGT  
TATATGCCTATATTCTAATCTCTAATGGATTCATATTAAGA

>CLEC4M-A\_TRINITY\_DN1982\_c0\_g1\_i1

ATGCATGATAGCCATGCTTGGATATAGTTTCAGTTCAGTGAGGAAAAGGTTTCATTCA  
TATTTACAAATACCTGGTTTACAAAATCTTCTTACATTTCTGCTTATACCAATGGTAATA  
ATAATAATACTAGCCAAATCAGGGACATGAAAGCATTCTGTAGGTCTTTGGTCTTCCC  
AATGAATGCAAACCATTAATAGAGTTATACAGGACAAAATGAAAATAGCACGTGAA  
AGAAATGTTTATTTTCCCACTCAGCCTTTCTTTTCAAAATATAAAAGGAATTAAAGTTTT  
TGTATTACTCTTAGTGAAAAAATAGTTTACTGTTTGACATTTAACATAATGCTCCATGGC  
AATGCCTAGCCTTCACAGTCGGGGTCTGAGACTGAAGTCTTGCAGCTCGCATTTATAA  
ATAGCCTTTACAAAGAGCAAACAGAAGTCGGTGCCTCACAAATAAAGCGTAATACGCT  
GGAACAGCGAGAATCACTCCATCTACCTTCAGATGTCATTAAGGCACAGTCTTCGTTAT  
ACCAGTCATCAGGCTCACCGCTAACCCAAAATTGTTTTCTGTTGTAGTTGCATTCACAAA  
AAGTGCCATCTACCCATTTCCACGTATCCTCTTTTTCGTTATCTGTAAGCCCAATCCAGT  
ACCACAGTTCACGTTTATCTGCGTTGCTTATTTAACTCTTTTGCTCTCTTATACAAAAA  
GTCCTGCTCCTCAGTACTTTTGATCACCCTAAATCCGATGACCAGTCTTTACATGTACT  
CCTTGAATTTGTCCAGCTTTCCCTAGACGCTGAGAAGTAGTAACAACCTTGTGTTGAATAT  
CTTCCAGCTTGCAGGGCAACATTCAACCTCCCTTCCTTGGTTTGATGATGCAGCAATTTT  
GTTCAACATATTCAGTTTATTTTCTATTTCTTATATTTCTCTTCTGCTGTTTTCTTGCTT  
ATCCATTTGGTGTGTTGATTGTGATGTTAATTTTTTTTTCAAGCTGAAACAGAAGGGCTTC  
CTTACTTCTTTGGAGTTCTGTAATATTATCTTCTGTCTCATGGACCTTCATCTGTAGGTCT  
GTCTGATTAAATGCCAAGATGGTGAATTTCTCTTCTGCTTCCTTAAATTTACTGTAAACA  
CTGAAATTCAATGACTGCAACTCGTGATTTGCTGGCCATATTGTTTTATTGGCTGTAAA  
TGTAACAGCCACAGTTATGACCACTGTGAGTAGGACGATAATGACAAATACCATAA  
AGAACGGCATCACTCTGCTTGTGAGTGTCTTGTGTTTACATCCTTAAATTTCTGCGATCC  
TTGCTTGTGTTTTCTCTAGCTGTGTGTTTCAAACTGGAGTGCCATGTGATGAAGCTC  
ACTTCAGCATATGTTATTTCTGCTTGCATGTTGGTTATTCCAAGTCTTTTTGTTTTACTGC  
TTTAATTTTATTTGCTTTTCTTTTCAAAAGCAAGTTCTATGTTTCCATATACTGACAGGTTT  
TAGATGACTCTCTGTGTTTGCTGTGATCTCTTCTTTTGCTTATTTCCCTTTTGCTGTCTCT  
GCTTACTGTCTATATTTTCTCAAGTTCTTACTCATGTTTCTGAACTTTTTTTTAAATCTAT  
TTGCTAAATGTTATCTCACCCACCTTCCTTCCATCCGTCTCTCTCTCTCTGCTTC

>CLEC4M-B\_TRINITY\_DN1982\_c0\_g1\_i4

ATGCATGATAGCCATGCTTGGATATAGTTTCAGTTCAGTGAGGAAAAGGTTTCATTCA  
TATTTACAAATACCTGGTTTACAAAATCTTCTTACATTTCTGCTTATACCAATGGTAATA  
ATAATACTAGCCAAATCAGGGACATGAAAGCATTCTGTAGGTCTTTGGTCTTCCAAT  
GAATGCAAACCATTAATAGAGTTATACAGGACAAAATGAAAATAGCACGTGAAAGA  
AATGTTTATTTTCCCACTCAGCCTTTCTTTTCAAAATATAAAAGGAATTAAAGTTTTGTA  
TTACTCTTAGTGAAAAAATAGTTTACTGTTTGACATTTAACATAATGCTCCATGGCAATG  
CCTAGCCTTCACAGTCGGGGTCTGAGACTGAAGTCTTGCAGCTCGCATTTATAAATAG

CCTTTACAAAGAGCAAACAGAAGTCGGTGCCTCACAAATAAAGCGTAATACGCTGGAA  
CAGCGAGAATCACTCCATCTACCTTCAGATGTCATTAAGGCACAGTCTTCGTTATACCA  
GTTATCAGGCTCACCCTGACCCAATATTGTTTTCTGTTGTAGTTGCATTACAAAAAGT  
GCCATCTACCCATTTCCACGTATCCTCTTTTTCTGTTATCTGTAAGCCCAATCCAGTACCA  
CAGTTACAGTTCATATCTGGGTTGCTTATTTAACTCTTTTGCTCTCTTATACAAAAAGTCC  
TGCTCCTCAGTACTTTTGATCACCCTAAATCCGATGACCAGTCTTTACATGTAATCCTT  
GAATTTGTCCAGCTTTCCCTAGACGCTGAGAAGTAGTAACAACCTTTGTTTGAATATCTTC  
CAGCTTGCAGGGCAACATTCAACCTCCCTTCGTAACAAACAGCCACAGTTATGACCCTGT  
GAGTAGGACGATAATGACAAATACCATAAAGAACGGCATCACTCTGCTTGTCAAGTGTTC  
TCTTGTTTACATCCTTAAATTTCTGCGATCCTTGCTTGTGTTTCTCTAGCTGTGTGTT  
ACAACCTGGAGTGCCATGTCGATTGAAGCTCAGTTCAGCATATGTTATTTCTGCTTGCATG  
TTGGTTATTCCAAGTTCTTTTTGTTTTACTGCTTAAATTTTATTTTGCCTTTCCTTCAAAGC  
AAGTTCTATGTTTCCATATACTGACAGGTTTATAGATGACTCTCTGTGTTTGTGTGATCTC  
TTCTTTTGTCTTATTTCCCTTTTGCTGTCTCCTGCTTACTGTCTATATTTTCTCAAGTTCTT  
ACTCATGTTTCCCTGAACCTTTTTTTTTAATCTATTTGCTAAATGTTATCTCACCCACCTTCC  
TTCCATCCGTCTCTCTCTCTCTTGTTC

>CLEC19A-A\_TRINITY\_DN1706\_c0\_g2\_i2

TATTAAATATCTTATTATCAAAAAATTACAAAGTATATTTAGCACTTCAAATCATCAAATA  
CAGAATGTAGGAATAAACATTTAAGAAAGAGAAATGCAGTACTAATAAAACAAGTAA  
AATCCAACAGTGAAGCCAATAAGAAACAACAGGTATATTTGATTTTGTATAAACTGT  
AAATTTTTTAAATCATCTGCTGAAAACATTTCTTGCGATGTCCATGTAAGACTTCTCCT  
TCATATTAGAATATTGGTGCGTATACAGAGCATCTTCGAAGGTCATATTTGCAGACAAA  
AGGGAAAGACCATCTGCTACTGTAGTCATTCCAGGTAATAGTACCATTCTGAAATACC  
ATGACCCAACATAATCTTCATTGCCAAGATTGTCTGGTTGGGATTTGCCAAAACGTAGG  
AAGTTCACTGGACTTCCATCAGTCCACATAAAAAACACCCTCTACAAAAGTGTATGTAA  
TCCAATCCAGTAAGCCTGTCCTTTTATGTAATCATTGGGTCTACCCATTAGTTCATAAAT  
GTAGTTATTTTCTTCAAGACTGTGGATGGATGCCAAATGAGCTCCGTAGTAGTTTCTTG  
GCAGTAGGCCTCAGCATTAAACCATGTCATTTTATTTGTATGGGACGAAAGCATGAAT  
TCTTGTACTGGAACCATCCAAATGAGCAGTCCCCCTGATAACAGAGACAGCCATCTGCA  
GTGTCACCACCAGGAATAAAGGCAGCCAGGAGTACAGACATCAGTATCAGGTAATTCA  
TCTTACAATGAATACGTCAAGTATGATGAACTTTTTTGGCAA

>CLEC19A-B\_TRINITY\_DN1706\_c0\_g1\_i1

TTATAACTTTGCCAAAAAAGTTCATCATACTTGACGTATTCATTGTAAAGATGAATTACC  
TGATACTGATGTCTGTACTCCTGGCTGCCTTTATTCTGCTGGTGACACTGCAGATGGCT  
GTCTCTGTTATCAGGGGGACTGCTCATTTGGATGGTTCAGTACAAGAATTCATGCTTTC  
GTCCCATACAAATAAAAAATGACATGGGTAAATGCTGAGGCCTACTGCCAAAGAACTA  
CTACGGAGCTCATTTGGCATCCATCCACAGTCTTGAAGAAAATAACTACATTTATGAAC  
TAATGGGTAGACCCAATGATTACATAAAAGGACAGGCTTACTGGATTGGATTACATGA  
CACTTTTGTAGAGGGTGTTTTTATGTGGACTGATGGAAGTCCAGTGAACCTCCTACGTTT  
TGGCAAATCCCAACCAGACAATCTTGCAATGAAGATTATGTTGGGTGATGGTATTTCC  
AGAATGGTACTATTACCTGGAATGACTACAATAGCATATGGTCTTTCCCTTTGTCTGCA  
AATATGACCTTCGAAGATGCTATGTCTACAGACCAATATTCTAATATGAAAGAGAAGTC  
TTACATGGACATCGCAAGAAATGTTTTAGTAGATGATTTGAAAAAATTACAGCTTTA  
TACAAAATCAAGTATACCTGTTGTTTCTTATTACATGTGATTTTATGGTTGGGTACAACC  
TTTTTATTATTACTGCATTTCTCTTTCTTATATGTTTATCCCTACATTCTGCATTTGATGATT  
TGAAGCTTTACATATGTACTGTAATTTTTGATGAAAG

>CLEC19A-C\_TRINITY\_DN14306\_c0\_g2\_i2

AAAATATTGCACACCATTGTGTTTCATTAGAAAGATGAATTACCTGATACTGATGTCAGC  
TATCCTGGTCATCTTTATTCTCAGGGTGACATGCAAATCAACCATTGCCTCTGTGTTCCG  
TGGGATCTGCCCATATGGATGGTACCAGTACACAGATAATTGCTACAAAGTTATAACTA  
CAAAAATGAGTTGGGTGAATGCTGAGGCCTTCTGCCAGAGTAGCTACCTTGGGGCTCAT  
TTGGCATCCATCCACAGTGCTGAAGAAAATGATTACATTTTCACTGACTGGGAACCT  
ATCTAATTACCAAACAGGAAATGCATACTGGATTGGAGCCCATGACACTATTGTAGAA  
GGCACCTACATGTGGACAGATGGAAGTGTGACAGACTACTTGCATTTTGGAACTGGTCA  
GCCAGATAACCTTGGCAATGAAGATTATATTGGATCGTGGCATTTCAAAATAATGCTA  
TTACCTGGAATGACTACCCAGAATCTTTTCCCTTTTGTCTGCAGGATCAGCCTAA  
ATAGATGCTGTCGTTCTTGAATGAAGAGTTGCAGACTGGCAGCCACGTATGACAAGTCT  
CCTGAGAACATCACAATGTTATGGCTCCCATCCAAGGAATTATATAATTTCTTTTCAA  
ATTATTTGCATCTATTGTTTGTACGATTATCCTATTCTTTTATTAAAGGTGTTTTTTTTGGT  
ACTATTCAATTTTATGACAATGGCCTGCTGAAATGAAATCCACTAGCTGTATCACTTCA  
ACAGACATTTATTACAGGTATATGAGTCAATGAACTCCTCTGGCCATCTTTCATTGGTAT  
GCATTTTGTGAGTCTTCAAAATAATAAAAAGGAATTTGAAGCTCAACCCTCAATAATAC  
CCTCTAAATACAGATTTTTTTTTAACTCAGAAAGTATAGTCAGTGTGAGTGAGCAAAGG  
AGTTAACAGGCTTGTGCATTTGATTAAATGTCTACCAAATCAAATGTCAGTAGATGT  
AAATGTAACATCCGCTTAAGAATTGCAGAACCATATTTTCTTTTCTGCTCATGTTGTATT  
GCTATTTTCTGTCAGGTATGTATGATCTGCTCTGATTGCATTGTGGAGGTTCTAGGCATT  
CATTCTATACTGTCATTATTGATATAACGTTGTCATTTGGGCTAAGTTGCTGAACAAATG  
GTGTATGCTACAGGTCTTAATAATAATACAATTCA

>CLEC16A-A\_TRINITY\_DN2288\_c0\_g1\_i1

GATTAGCGATGGCTGAAATTTTGGATATGTGGGAATGGTAATGTCACCTATTAAAGGAA  
GATTTGGGTACTTCGAACGTGGTTGTTGGTTTTCAAAATGGGTAACGGAGACTAAAATC  
CATTACAGGATGTTTGGCCGTTCTAGAAGCTGGATGGTTGGCGGTCCAGGAAGGTCTTCA  
AAGAGCATTCACTCTTTGGACCACTTAAAAAATATGCATCACCTCTTAATAAAAAACAC  
TACTGTCACCTGATCACAACCGTGACCTGCTAGTAGAAACCATCCGTTCTATCACTGAAA  
TTCTCATTGTTGGGTGACCAGAATGACAGCTCAGTGTTTGATTTCTTTTGGAGAAAAATA  
TGTTTGCCTTCTTGAATATTCTTCGGCAGAAATCTGGGCGCTATGTCTGTGTGCAGCT  
GCTTCAGACCCTGAATATTTTGTGTTGAGAACATCAGCCACGAAACATCCCTTTATTACTT  
ACTGTCCAACAACCATGTGAATTCAATTATCGTTCACAAGTTTGACTTCTCTGATGAGGA  
GATTATGGCATACTACATATCATTCCTGAAGACACTGTCATTGAAGCTCAACAACCATA  
CAGTACACTTTTTTTACAATGAGCACACAAATGATTTTGCATTGTATACAGAGGCAATC  
AAATTTTTTAATCATCCAGAAAGCATGGTCAGAATTGCTGTCAGGACCATCACTCTTAA  
TGTTTATAAAGTGAACAACCAGCATATGCTACATTATATTAGAGACAAAAGTCTGCCC  
CCTATTTCTCCAATCTGGTCTGGTTCATTGGGAGCCATGTGATAGAACTGGACAACCTGTG  
TCCAGACTGATGAAGAACACGCAAAACAAGAGCAAGCTGAGTGACCTTGTGTCAGAGCA  
CCTCGACCACTTGCAATTACCTAAATGACATTCTGATTATCAACTGTGAATTTCTAAATGA  
TGTGCTTACAGATCACCTGCTGAACAGACTGTTCCCTGCCTTTGTATGTCTACTCCTTAGT  
AACTCATGAAAAGTGTGGAGAGCTTCCAAAAATCAGCGCGCAGGTGTCACCTCTATCTC  
CTTTCACAGGTCTTTCTGATCATACTACTCACCTTTGGTGAACCTCCTTGGCTGATGTTA  
TTTTGAACGGTGACCTTTCTGTGTTTTCTGCACAGACAGAGCAAGATGTACAGAAGAGC  
ATGGCAAAGTCCAATATACGATGCTTCACAAAGCCTGCAGAGAGTCTTGAGAAATCAC  
TTGAGATCAGTAAGCAGAGGGGGAGAAAAAAGCACAGAAAAGGCCAAATTATAAG  
AATGTGGGTGAGGAGGAGGAAGAGGAAAAACCTCCAGATGAAACTCTGGAAGATCCT  
GACAAGGCAAAAGGTACAGACGGAGCTTCAAAAAGCAACAGGACTACTTTGGAGACA  
GAAGAAATAGAGATGGTAATTATGGAGAGGTGTAAAATATCAAAAAGCTGTGGTAATGG  
AACAGAATACTACAGATGAAGAGAAGAGTGTGCTGCTGCAGCAGCTGGAATAGAGACTT  
CACAAAACAGGCCATTTTTGGATGTGGTATATAATGCTCTGGACTGCTCGGGAGATGAT  
TATTATGCATTGTTTGTCTTTGTCTGCTCTATGCAGTGTCCACAACAGAGGTATTGATT

CTACTCTGCTAGAAAAAATCCAGCTTCCATTTTCGGCAAACAGCTGAGAAGACAGTATAT  
AGTCATGTTCTTGCTGAGAGGCTAATCAGGATAACGATCAATGCTGCCCAGCCAGACA  
GCAAGATTCGACTTGCAACTTTGGAACCTAGTTGTTTGCTTCTGAAACAGCTTGTAATTT  
CAGACAGCGGCTGTGTTATAAAGGACATACACCTGGCTTGCCTGGAGGGGGAAGAAAT  
TTTTCTTGATGTGTTTGAAGATGAATACAGAAGCATGATGAACAAACCACTGAATGTAG  
AGTACCTGATGATGGATGCTTCCATTCTGCTGCCCCCACTGGGACTCCGCTGACTGGTA  
TTGATTTTGTAAAGAGACTTCCCTGTGGAGATGTCGAGCGAACACGAAGAGCAATAAG  
AGTTTTTTTTCATGTTGCGAGCTTTATCACTGGAAGCTGAGAGGAGAACTGGAGACTCAGC  
TGCCCTTGACAAGGGAGGAAGATCTGATTAAGAACTGAAGATGTTTTGGATCTTAATAAC  
AGTGAAGTTGATTGCCTGCACAGTGATTGCAAAGGATGGAGGACAAGCTCAGCGATTTCT  
GGCTGTTGATATTTACCAGATGAGTTTAGTTGAACCCGAGACCAAAAAGACTTGGCTGGG  
GTGTGGTGAAGTTTGCTGGACTTCTGCAGGATATGCAGGTCAGTGGGGTGGAAGATGAC  
AGCCGTGCGCTAAATATCACAATTCACAAGCCCACATCAAATCCTCATGCCAAACCATT  
TCCCATTTTACAGGCTACATTTATCTTTCTGATCATATCCGCTGCATAATTGCAAAGCA  
GAGACTGGCAAAGGGCCGCATCCAGGCACGGCGTATGAAAATGCAGAGAATAGCAGC  
ATTGCTAGATCTTCCTGTTGAGCCATCTCCTGAGGTAATGGGCTTTGGACATGTTACAAG  
TGCAGCTACCCAGCATCTGCCTTTTCGATTTTATGACCAGTCAAGACGTGGATTAAGTG  
ACAGTGCAGTTCAGCGTTCTGTGTTTGCTTCTGTTGACAAAGTTCCAGGTTTGTCTGTAG  
CCCAGTGTGTAAACCAGCATACTTCTGCACCAGCATCCTCACCATCCCCTCCTTCCAGC  
AGTAGCCCCAATGGCAGTGGGAGCACTGGTCATTGTGATTGAGTCACAGCTAGCACAA  
CATCCACTCCTGCAGCCCAAAGTCCATCAGACGATCCAGCATCTTTGGAAGAGTCATCG  
CTGAATCTGCCTGCGCAGGTGGAGTTTGTGATGAGACTAGCTGTAGCACTCCAGGCCC  
CAGCAAGAACTTCCAGAGGAACTCTGAGTCTGAACCAGCTAACCTGGCCCCAAGCCTT  
ACCCCTTCTCAACAGCCAACCATATCATTACTGTCAGATGACAATACAGATGCACGCAG  
TGTGGAGTCCTTGACACTTGTCCCACCTGCTGATCCACATTGCATCTTAAGTTTTAGCAA  
CACTGTACAGTCCTCAGTGCTGTCTGAGTCAGCATTAAACCAATGAGGGGTATCATGCTG  
AGACTTTTGAACCAGAAACAAGTACAGAAGTGTGAACAGAACCCATTAGACTTTTTTCT  
CTTCTTGGAAATGGGAGACTCTGTGAACTTTCAATGACTTTTGATGCAAAACACTGCAAT  
ATACCACGTTGTTTATGTTAGTAAGTGAAATGCAAGCAACTGTCTTTTAATGTCTATGGG  
AGAGATGTTGAAGGAAGACTGATGAAGCTGAATTTCTTCACTGATTAGTCCATATAATA  
AAAGGAAAGTGCAGTCTCCCTGCTGATTGAACAAAATTTCCAGGTGTTATTTATTCACA  
CAGCTTAGTTCTGCTATTTTACAGTGTTGAACAATGACTTGAAGGTGGACAGCTGAAG  
GAGGTCTTCTTTTCTTCCCCATTTTATTGTCTGCCGCCAAGTTTTGTTAGACTAGGCTTTT  
GTATCTGCAGGTGTGTCAGTCACTACAAGTCCATGTGATGTGTGAAAATACCATTTGTGAT  
CTGATCTAATGGAGTCAGGATCGTAGTTTTTGAATAATGGCCTGCCTAAATAAAATCAT  
TTACCATGATCTTCCAAACAAGTTGTATCTTGTACACTAAAATTGCACTGGATGTTTAGG  
GACCAGTATAATTTTGTGAAACATACGTTCTTATTTATTCCTTTTGTGTTAGTTATAAATA  
TGGGTTATGTTAAAAATGTTAAAGTGGCCTACAGTAATATAGCAGATGCATTATGCCAT  
GTGTTTGCATTGAGTTAGATGCATTTTCCCTGTATTTAGTGCAGATTTAG

>CLEC16A-B\_TRINITY\_DN2288\_c0\_g2\_i2

CTAAATCTGCACTAAATACAGGGGAAAATGCATCTAACTGAATGCAAACACATGGCATA  
ATGCATCTGCTATATTACTGTAGGCCACTTTAACATTTTTAACATAACCCATATTTATAA  
CTACAACAAAAGGAATAAATAAGAACGTATGTTTCACAAAATTATACTGGTCCCTAAA  
CATCCAGTGCAATTTTAGTGTACAAGATACAACCTGTTTGGAAGATCATGGTAAATGAT  
TTTATTTAGGCAGGCCATTATTTCAAACTACGATCCTGACTCCATTAGATCAGATGACA  
AATGGTATTTTACACATCACATGGACTTGTAGTGACTGACAACCTGCAGATACAAAAG  
CCTAGTCTAACAAAACCTTGGCGGCAGACAATAAAAAATGGGGAAGAAAAGAAGACCTC  
CTTCAGCTGTCCACCTTCAAGTCATTGTTCAACACTGTGAAAATAGCAGAACTAAGCTG  
TGTGAATAAATAACACCTGGAAATTTTGTTCATCAGCAGGGAGACTGCACTTTTCTTTT  
ATTATATGGACTAATCAGTGAAGAAATTCAGCTTCATCAGTCTTCCTTCAACATCTCTCC

CATAGACATTAAAAGACAGTTGCTTGCATTTCACTTCTACCATGAACAACGTGGTATAT  
TGCAGTGTTTTGCATCAAAAGTCATTGAAAGTTCACAGAGTCTCCCATTTCCAAGAAGAG  
AAAAAAGTCTAATGGGTTCTGTTACACTTCTGTACTTGTCTGGTTCAAAAGTCTCAG  
CATGATACCCCTCATTGGTTAATGCTGACTCAGACAGCACTGAGGACTGTACAGTGTTG  
CTAAAACCTAAGATGCAATGTGGATCAGCAGGTGGGACAAGTGTCAAGGACTCCACAC  
TGCGTGCATCTGTATTGTCATCTGACAGTAATGATATGGTTGGCTGTTGAGAAGGGGT  
AGGCTTGGGGCCAGGTTAGCTGGTTCAGACTCAGAGTTCCTCTGGAAGTTCTTGCTGGG  
GCCTGGAGTGCTACAGCTAGTCTCATCAACAAACTCCACCTGCGCAGGCAGATTACAGC  
GATGACTCTTCCAAGATGCTGGATCGTCTGTTTCCTGCTTTGTAAGAGCTGCTGCTGCT  
TGAAGACCTAAACCCAGTGTCCACCATGACTGTCAGCTTCCGACAGACTAAAAACTCG  
CCGCCGTCCTTTCTGCCAGACCTTACTGATGGACTTTGGGCTGCAGGAGTGGATGTTGT  
GCTAGCTGTGACTGAATCACAATGACCAGTGCTCCCACTGCCATTGGGGCTACTGCTGG  
AAGGAGGGGATGGTGAGGATGCTGGTGCAGAAAGTATGCTGGTTTACACACTGGGCTAC  
AGCAAAACCTGGAACCTTGTCAACAGAAGCAAAACACAGAACGCTGAACTGCACTGTCA  
CTTAATCCACGTCTTGACTGGTCATAAAATCGAAAAGGCAGATGCTGGGTAGCTGCACT  
TGTAACATGTCCAAAGCCCATACCTCAGGAGATGGCTGAACAGGAAGATCTAGCAAT  
GCTGCTATTCTCTGCATTTTCATACGCCGTGCCTGGATGCGGCCCTTTGCCAGTCTCTGCT  
TTGCAATTATGCAGCGGATATGATCAGAAAAGATAAATGTAGCCTGTAAAATGGGAAA  
TGGTTTGGCATGAGGATTTGATGTGGGCTTGTGAATTGTGATATTTAGCGCACGGCTGTC  
ATCTTCCACCCCAGTGACCTGCATATCCTGCAGAAGTCCAGCAAACTTCACCACACCCC  
AGCCAAGTCTTTTGGTCTCGGGTTCAACTAAACTCATCTGGTAAATATCAACAGCCAGA  
AATCGCTGAGCTTGTCTCCATCCTTTGCAATCACTGTGCAGGCAATCAAGTCACTGTTA  
TTAAGATCCAAAACATCTTCAGTTTTAATCAGATCTTCTCCCTTGTC AAGGGCAGCTGA  
GTCTCCAGTTCTCCTCTCAGTTCAGTGATAAAGCTCGCAACATGAAAAAACTCTTATT  
GCTCTTCGTGTTTCGCTCGACATCTCCACAGGGAAGTCTCTTAACAAAATCAATACCACT  
CAGCGGAGTCCCAGTGGGGGGCAGCAGAATGGAAGCATCCATCATCAGGTACTCTACA  
TTCAGTGGTTTGTTCATCATGCTTCTGTATTCTTCAAACACATCAAGAAAAATTTCTT  
CCCCCTTATAAAAAGCGTCGTAAGAGATGGACACTTTCTTCCCTTGCAACCCTCCAGGCAA  
GCCAGGTGTATGTCCTTTATAACACAGCCGCTGTCTGAAATTACAAGCTGTTTCAGAAG  
CAAACAATAAGTTCCAAAGTTGCAAGTCGAATCTTGCTGTCTGGCTGGGCAGCATTGA  
TCGTTATCCTGATTAGCCTCTCAGCAAGAACATGACTATATACTGTCTTCTCAGCTGTTT  
GCCGAAATGGAAGCTGGATTTTTTCTAGCAGAGTAGAATCAATACCTCTGTTGTGGGAC  
ACTGCATAGAGCAGACAAAGGACAAACAATGCATAATAATCATCTCCCGAGCAGTCCA  
GAGCATTATATACCACATCCAAAAATGGCCTGTTTTGTGAAGTCTCTATTCCAGCTGCTG  
CAGCAGCACTCTTCTTTCATCTGTAGTATTCTGTTCCATTACCACAGCTTTTGATATTTT  
ACACCTCTCCATAATTACCATCTCTATTTCTTCTGTCTCCAAAGTAGTCTGTTGCTTTTT  
GAAGTCCGTCTGTACCTTTTGCTTGTGAGGATCTTCCAGAGTTTCATCTGGAGGTTTTT  
CCTCTTCTCCTCCTCACCCACATTCTTATAATTTGGCCTTTTCTGTGCTTTTTTTCTCCCC  
CTCTGCTTACTGATCTCAAGTGATTTCTCAAGACTCTCTGCAGGCTTTGTGAAGCATCGT  
ATATTGGACTTTGCCATGCTCTTCTGTACATCTTGCTCTGTCTGTGCAGAAAACACAGAA  
AGGTCACCGTTCAAATAACATCAGCCAAGGAGTTCACCAAAGGTGAGTAGTGTATGA  
TCAGAAAGACCTGTGAAAGGAGATAGAGTGACACCTGCGCGCTGATTTTTGGAAGCTC  
TCCACACTTTTCATGAGTTACTAAGGAGTAGACATACAAAGGCAGGAACAGTCTGTTCA  
GCAGGTGATCTGTAAGCACATCATTTAGAAATTCACAGTTGATAATCAGAATGTCATTT  
AGGTAATGCAAGTGGTCGAGGTGCTCTGCAACAAGGTCACCTCAGCTTGCTCTTGTTTGC  
GTGTTCTTCATCAGTCTGGACACAGTTGTCCAGTTCTATCACATGGCTCCCAATGAACCA  
GACCAGATTGGAGAAATAGGGGGCAGCAGTTTTGTCTCTAATATAATGTAGCATATGCT  
GGTTGTTCACTTTATAAACATTAAGAGTGATGGTCCTGACAGCAATTCTGACCATGCTTT  
CTGGATGATTAAAAAATTTGATTGCCTCTGTATACAATGCAAAATCATTGTGTGCTCAT  
TGTAAAAAAAGTGTACTGTATGGTTGTTGAGCTTCAATGACAGTGTCTTCAGGAATGAT  
ATGTAGTATGCCATAATCTCCTCATCAGAGAAGTCAAACCTTGTAACGATAATTGAATT

CACATGGTTGTTGGACAGTAAGTAATAAAGGGATGTTTCGTGGCTGATGTTCTCAAACA  
AAATATTCAGGGTCTGAAGCAGCTGCACACAGACATAGCGCCCAGATTTCTGCCGAAG  
AATATTCAAGAAGAAGGCCAAACATATTTTTCTCCAAAAAGAAATCAAACACTGAGCTG  
TCATTCTGGTCACCCCAAATGAGAATTCAGTGATAGAACGGATGGTTTCTACTAGCAG  
GTCACGGTTGTGATCAGTGACAGTAGTGTGTTTAGTTAAGAGGTGATGCATATTTTTTAA  
GTGGTCCAAAGAGTGAATGCTCTTTGAAGACCTTCCTGGACCGCCAACCATCCAGCTTC  
TAGAACGGCCAAACATCCTGAATGGATTTTAGTCTCCGTTACCCATTTTGAAAACCAAC  
AACCACGTTTCGAAGTACCCAAATCTTCCTTTAATAAGTGACATTACCATTCCCACATAT  
CCAAAATTTACGCCATCGCTAATC

>CLEC16A-C\_TRINITY\_DN2288\_c0\_g1\_i3

GATTAGCGATGGCTGAAATTTTGGATATGTGGGAATGGTAATGTCACTTATTAAAGGAA  
GATTTGGGTACTTCGAACGTGGTTGTTGGTTTTCAAATGGGTAACGGAGACTAAAATC  
CATTACGGATGTTTGGCCGTTCTAGAAGCTGGATGGTTGGCGGTCCAGGAAGGTCTTCA  
AAGAGCATTCACTCTTTGGACCACTTAAAAAATATGCATCACCTCTTAATAAAAAACAC  
TACTGTCACTGATCACAACCGTGACCTGCTAGTAGAAACCATCCGTTCTATCACTGAAA  
TTCTCATTTGGGGTGACCAGAATGACAGCTCAGTGTTTGATTTCTTTTTGGAGAAAAATA  
TGTTTGCCTTCTTCTGAATATTCTTCGGCAGAAATCTGGGCGCTATGTCTGTGTGCAGCT  
GCTTCAGACCCTGAATATTTTGTGTTGAGAACATCAGCCACGAAACATCCCTTTATTACTT  
ACTGTCCAACAACCATGTGAATTCAATTATCGTTCACAAGTTTGACTTCTCTGATGAGGA  
GATTATGGCATACTACATATCATTCCCTGAAGACACTGTCATTGAAGCTCAACAACCATA  
CAGTACACTTTTTTTACAATGAGCACACAAATGATTTTGCATTGTATACAGAGGCAATC  
AAATTTTTTAATCATCCAGAAAGCATGGTCAGAATTGCTGTCAGGACCATCACTCTTAA  
TGTTTATAAAGTGAACAACCAGCATATGCTACATTATATTAGAGACAAAACCTGCTGCCC  
CCTATTTCTCCAATCTGGTCTGGTTCATTGGGAGCCATGTGATAGAACTGGACAACCTGTG  
TCCAGACTGATGAAGAACACGCAAACAAGAGCAAGCTGAGTGACCTTGTTGCAGAGCA  
CCTCGACCACTTGCAATTACCTAAATGACATTCTGATTATCAACTGTGAATTTCTAAATGA  
TGTGCTTACAGATCACCTGCTGAACAGACTGTTCCCTGCCTTTGTATGTCTACTCCTTAGT  
AACTCATGAAAAGTGTGGAGAGCTTCAAAAATCAGCGCGCAGGTGTCACCTCTATCTC  
CTTTCACAGGTCTTTCTGATCATACACTACTCACCTTTGGTGAACCTCCTTGGCTGATGTTA  
TTTTGAACGGTGACCTTTCTGTGTTTTCTGCACAGACAGAGCAAGATGTACAGAAGAGC  
ATGGCAAAGTCCAATATACGATGCTTCACAAAGCCTGCAGAGAGTCTTGAGAAATCAC  
TTGAGATCAGTAAGCAGAGGGGGAGAAAAAAGCACAGAAAAGGCCAAATTATAAG  
AATGTGGGTGAGGAGGAGGAAGAGGAAAAACCTCCAGATGAAACTCTGGAAGATCCT  
GACAAGGCAAAAAGGTACAGACGGAGCTTCAAAAAGCAACAGGACTACTTTGGAGACA  
GAAGAAATAGAGATGGTAATTATGGAGAGGTGTAAAATATCAAAAAGCTGTGGTAATGG  
AACAGAATACTACAGATGAAGAGAAGAGTGCTGCTGCAGCAGCTGGAATAGAGACTT  
CACAAAACAGGCCATTTTTGGATGTGGTATATAATGCTCTGGACTGCTCGGGAGATGAT  
TATTATGCATTGTTTGCCTTTGTCTGCTCTATGCAGTGTCCACAACAGAGGTATTGATT  
CTACTCTGCTAGAAAAAATCCAGCTTCCATTTCCGGCAAACAGCTGAGAAGACAGTATAT  
AGTCATGTTCTTGCTGAGAGGCTAATCAGGATAACGATCAATGCTGCCCAGCCAGACA  
GCAAGATTCGACTTGCAACTTTGGAACCTTAGTTGTTTGCTTCTGAAACAGCTTGTAATTT  
CAGACAGCGGCTGTGTTATAAAGGACATACACCTGGCTTGCCTGGAGGGGGAAGAAAT  
TTTTCTTGATGTGTTTGAAGATGAATACAGAAGCATGATGAACAAACCACTGAATGTAG  
AGTACCTGATGATGGATGCTTCCATTCTGCTGCCCCCACTGGGACTCCGCTGACTGGTA  
TTGATTTTGTAAAGAGACTTCCCTGTGGAGATGTCGAGCGAACACGAAGAGCAATAAG  
AGTTTTTTTTCATGTTGCGAGCTTTATCACTGGAACCTGAGAGGAGAACTGGAGACTCAG  
CTGCCCTTGACAAGGGAGGAAGATCTGATTAAAACTGAAGATGTTTTGGATCTTAATAA  
CAGTGACTTGATTGCCTGCACAGTGATTGCAAAGGATGGAGGACAAGCTCAGCGATTTT  
TGGCTGTTGATATTTACCAGATGAGTTTAGTTGAACCCGAGACCAAAAGACTTGGCTGG  
GGTGTGGTGAAGTTTGTCTGGACTTCTGCAGGATATGCAGGTCACTGGGGTGAAGATGA

CAGCCGTGCGCTAAATATCACAATTCACAAGCCCACATCAAATCCTCATGCCAAACCA  
TTTCCCATTTTACAGGCTACATTTATCTTTTCTGATCATATCCGCTGCATAATTGCAAAGC  
AGAGACTGGCAAAGGGCCGCATCCAGGCACGGCGTATGAAAATGCAGAGAATAGCAG  
CATTGCTAGATCTTCCTGTTTCAGCCATCTCCTGAGGTAATGGGCTTTGGACATGTTACAA  
GTGCAGCTACCCAGCATCTGCCTTTTCGATTTTATGACCAGTCAAGACGTGGATTAAGT  
GACAGTGCAGTTCAGCGTTCTGTGTTTGCTTCTGTTGACAAAGTTCCAGGTTTTGCTGTA  
GCCCAGTGTGTAAACCAGCATACTTCTGCACCAGCATCCTCACCATCCCCCTCCTTCCAG  
CAGTAGCCCCAATGGCAGTGGGAGCACTGGTCATTGTGATTCAGTCACAGCTAGCACA  
ACATCCACTCCTGCAGCCCCAAAGTCCATCAGTAAGGTCTGGCAGGAAAGGACGGCGGC  
GAGTTTTTAGTCTGTGCGAAGCTGACAGTCATGGTGGACACTGGGTTTAGGTCTTCAAG  
CAGCAGCAGCTCTTACAAAGCAGGAAACAGACGATCCAGCATCTTTGGAAGAGTCATC  
GCTGAATCTGCCTGCGCAGGTGGAGTTTGTGATGAGACTAGCTGTAGCACTCCAGGCC  
CCAGCAAGAACTTCCAGAGGAACTCTGAGTCTGAACCAGCTAACCTGGCCCCAAGCCT  
TACCCTTCTCAACAGCCAACCATATCATTACTGTCAGATGACAATACAGATGCACGCA  
GTGTGGAGTCCTTGACACTTGTCCCACCTGCTGATCCACATTGCATCTTAAGTTTTAGCA  
ACACTGTACAGTCCTCAGTGCTGTCTGAGTCAGCATTAAACCAATGAGGGGTATCATGCT  
GAGACTTTTGAACCAGAAACAAGTACAGAAGTGTGAACAGAACCCATTAGACTTTTTTC  
TCTTCTTGAATGGGAGACTCTGTGAACTTTCAATGACTTTTGATGCAAAACACTGCAAT  
ATACCACGTTGTTTCATGGTAGAAGTGAAATGCAAGCAACTGTCTTTTAATGTCTATGGG  
AGAGATGTTGAAGGAAGACTGATGAAGCTGAATTTCTTCACTGATTAGTCCATATAATA  
AAAGGAAAGTGCAGTCTCCCTGCTGATTGAACAAAATTTCCAGGTGTTATTTATTCACA  
CAGCTTAGTTCTGCTATTTTCACAGTGTGAAACAATGACTTGAAGGTGGACAGCTGAAG  
GAGGTCTTCTTTTCTTCCCCATTTTTATTGTCTGCCGCCAAGTTTTGTTAGACTAGGCTTTT  
GTATCTGCAGGTGTGTCAGTCACTACAAGTCCATGTGATGTGTGAAAATACCATTGTGTCAT  
CTGATCTAATGGAGTCAGGATCGTAGTTTTGAAATAATGGCCTGCCTAAATAAAATCAT  
TTACCATGATCTTCCAAACAAGTTGTATCTTGTACACTAAAATTGCACTGGATGTTTAGG  
GACCAGTATAATTTTGTGAAACATACGTTCTTATTTATTCCTTTTGTGTTAGTTATAAATA  
TGGGTTATGTTAAAAATGTTAAAGTGGCCTACAGTAATATAGCAGATGCATTATGCCAT  
GTGTTTGCATTACAGTTAGATGCATTTCCCTGTATTTAGTGCAGATTTAG

>KLRG1\_TRINITY\_DN6253\_c0\_g1\_i1

TTTTTCAGAGTAAGAATTGTGCTTTTTTTTGTAACATTTATTTTTTTAGACAGTCCTACAATT  
GTAAGTGTAGTCCACTTTTAATGCAAGCTGCTAAATGCATCCTTTGTACATATGAAGTTG  
AAGTCTTCTTCACACGATGAGGCTGAAAGTCCATGGGAGTTAATGACTAGACATCTCTG  
TCCACATAATTACTTCTCACAGGAAAAATGGTGGTATTCAGAGGAATTCATCTTCCC  
AAATCCACATGTCAATTTTGTGTTTGTGATCCCAATCCAGTGATATGTTTCTTTTGCTACTTT  
GTTTGCAAAATTCATTGCTTCCTTTTGTGTTTCCTTAAATATCGATGAATGATGTGCTGAA  
CAAAATTCCTTTGGAAGAAGTCCAGTTCTTCTTTTATCAGAAAATAGATAACATTTACTA  
TGGTATCCAATCCATTTTCTTGGCATACGAAGCACTTTCCTGTACCATTGCTTTCTGAAT  
CTTTGCACTTCTGAGTTATCATCTTCCATTCAACTAACAGAAGAGTGAGGATTGACACTG  
CCAACAAAAGGCACAATGTGGAAATGAGGAACATAATGCAACAACAATTGAAATTAG  
ATGATTTAGGATCTTTCTCATTTCCAGAGTGCTGTTTTTGGTGTTCAGTGTGCTGGGCTC  
CTTGACTGTACCTCTGGCTGTTCTTGTGGTGGCTTTCTCATTTCCAGAGTGCTGTTTTTGGT  
GTTCCAGTGTGCTGGGCTCCTTGACTGTACCTCTGGCTGTTCTTGTGGTGGCTCTTTCTTT  
AGCTGTTGGCTCAATTTTTTTGAGTAAACTGAATTAATGTATATATTGTCATCTTTCTTC  
CTCACATCTTGTACAGCTTGATTATTCAGATTTTCAGCTTTTGTGTTGTTTAAATTGAG  
ATATGTTGCAATAGATAACTCTGTTTTGTCTTTCATGTTTTGTGAGCTTTCTTCTCCAA  
AGGTCTGCTGTAAACTATGTTACTTTTTTAGCAGATAAGATGTATTTGTTTGTGCTTTG  
ATTTCTTCCAGTTGCTGAAGGTTCTACTTTCTGTTCTGCATTATTAGCATTAACTTTAC  
ATTGCTAGTGACAGATGGTCAGTTCTATCCCCATA

>SELE-A\_TRINITY\_DN68820\_c1\_g1\_i11

CTGGGATGAAACTGCAGTCGGCGGTTTCAGGGACATTTTGTAGCTGTTTCGTTTCCAAAC  
AGCTACTCGTTCAGCTGATCGAGGGGAACGCAGAGGGACTGATCAGCTGATTTTCCATG  
CCACTTCCACCAGGGAACCTTTCTTTACTACGTTGTTAGTCAGCAGCTCGACCTGAAGAG  
GGAGCTGCTGACTTAAGTCCTGGGAGAATGCCACATTTGTCTCTGTGGCTTTTTTTAAAT  
CATGCAGTTCTCCCAGGCAAGTGAAGATATTTAACCTCTCCACCAGGAAGAAACTGCA  
GTCGGCAGTTTCTGGGTGATACTAGCTGTTTTTCAAAGAGCTACGCATTTCAAGCTGATT  
TAGGGGAATGTGAACAGACTGATCAGCTGTTTCTTGGTGCCACTTCCACCAGGGAAACT  
TTATTCACCTAGTAATAGTTACCACGCAAAAAAGACAAAGCAATGCAGAACCCTGTGC  
GAATGAAGGCTTTTATTCGCAACGGATACTTAATGACATTTGATGAAGCTAAAGAATAC  
TGTCAAACATACTACGATGGCCTGGCAGAGATCTATCAAGAATCAGAGAATGCTCAAA  
TACCAGAATTTATTCATGAGAGACAGTGCTGGATAGGTACTGAAAACCTGTCAGAGGGT  
CTTTGCCACAAATTATACTGAATGGTGCTACAGCAGAAGTAAACGCAATGTCAGCTTTT  
TACCCTGGAAGAAAACAAAACCCGAATACAACCATGTGCAAGGGACATATGCCTGTGT  
CTTTATTAAGATGATGCTATGTGGCATCTTGAACCATGCAAAAACAAAGAAAACATCA  
CTCTGTCAAAAATTGCACTGTGGTACCCAAAGCTGTAGCGGACGAGGCAGATGCATGG  
AGGAGCTGAACCTCTACCAGTGCAAGTGCTTTCCAGGGTTCAGTGGTCCTAACTGTGAG  
ACTGTGACACACTGCCCAAAGCTTGCTCCTCCAGATGATGCAGAAGTGAGGTTTGTAGT  
GGGAAGCCATGGACCTCTGGCTTTTTCTGCGGTGTGGAATTTTAGCTGTATAGAAGGATT  
TATGCTGAATGGAACCTCACAGACTACTTGTCTACCTTCTGGATTGTGGAGTCACTACTC  
ATTTACAGTGTGTGGCTAAGACAGATTATCCTTCCAACCTTACGGAAGCTTGTGTTGCTGC  
TGCCACTGCTGGGAGTTCATTTTGATATCTATCACTGTGTTCTTCATTTGGAAGCATTAC  
TCTGCAGGAGGTGCGTGTA AAAACTTTAGAAACACTGAGGCTGACTACCAGTGTCTGCT  
GCTAGAAGAAGTAGAGAGAGATTTGGAAAATACAGTCTTGTGAGCACTGTAGAATTAA  
ATGCATGTTAAACAATGCTGAACTTGTCACTACCTTGTGCACTTAAAAATGAATCATT  
ACACATTCCTGTCTCTTGAAAAGTAATGTATTTATCCCATATTCATTAATTTCTGTTCTAC  
CCTGACAGAGCAAGTGAGGCACACTTGGTGTAGTTGCAGGCAGCACTAATAGTTATGA  
TTTGCCCTTTACCAGAAAACAGATTCCAAGCATATATATGGCATGCTGTTGGGCATAATG  
AATCCTCAAACAAGCATCCACGATTCCATATTTTGCATAGTTAGATACCCGTGAACAAA  
AATGCAATGTACTTTGTCAATTAGTTTAAGATTGCTGTAAGTGGCATGTAGACACACTGCT  
CAAGAAGTAGTAATCCAGTAAATGCATGTACTTGCTGCAGAGAGAATGAAACTACTT  
TTGAAGATCTGTAATACATTACATTTCTCTACAGGCTTTCCCTGATGTGCCCTGAATT  
CAATATCTGTATCTGTTCTAAACATGTCAGTGTGTGTAAGTACTGATTATTGCAATTGTTATTCA  
CTGTGCTTTTTATTTTGAGAGTGAGTTAACTGCTAGAATTGCTTGGAATATCAGTTGTA  
TATCCATGCACTGCTTATAGTTTCTGTAGATTTAAATATGTGAAAAGTTTAATGGGAGT  
TAAGAATCACCTGCCTGGACTGTCTGACCGTTATGTTTCATGTTTGTCCATAATCACTCTG  
ATACTTTATACAATAGTGTAGCTATTATTTTGTAGTATACTAAAACAGTGCAACATCAGC  
AGCACTTTTGAATGCTTAACAAAAGTTGTTTTGTAACCCTAATAAATCAGATGGTGTGATG  
GACTGTCTTTGTATCAGGGGTAAAAGCAGTGCTGATAGCAAATGTTTATGTCAATCATC  
ATATATGCCTGCTTTGTGGCACAATAAAAAGTTTAAGAAGTATATTTTCTTCTGAAT

>CD209\_TRINITY\_DN7436\_c0\_g4\_i1

AAGTTGCTCATTAACACTTCCACATGAGAATTGAAAAAGAATATTTAAGACATTTGAAC  
AACTTCAGACAAACTGAAAAACAACCTGAAATGACAGCAAGACTACAGAAAGCAGCAA  
AAGAAGAAATGATGAAGCGTGGAAGGATATTCAGTGCTGTTGATTATTTCCACTATC  
ATCCTTGTGCTCTGCTGGTCATAAATGTAATCTTATTGCTTTTAACTATACGGATGTCAG  
AAGAGTTAAGTAAGTGCATGAATAGCACACATCCAACCTGAGCACCCAAAAACTACAGC  
AATGACAACAACAACAACAACAACAACAACAGCAGCAACAACCTGCACCTTT  
TACTAGCTGTAACCCAGATGAAATACGTTTTAACAACAGCTGTTATTTCTTCTCCTCCAA  
CCTACATAATACCTGGAGTGAAAGCCAGGAATATTGTAAAAAGAAGAATTCTGATTTA  
GTTGTAATCAAAAAGTGCTGAAAAACAGCAATTCATGAAACTGAACACTGCAAAGGATG

GTGGATTCTATTGGCTTGGACTACAATATGCTGGTGCACAAACGTGGAAATGGGTGGAT  
GGGACTATTTGCGATGTCCATGACAAGAAAACAACATATTTTGTGATGGAAAACCTAG  
CCCCAGTGAACCAGATAAAGACTGTGTCTACATGACATATCCCTCAGGACTATGGAAT  
ACTGAGAATTGTGGTTTCAATTACCGATGGGCATGTGAGAGAAAGATAACTCACTGATG  
AACAACATTATCTAGGAAGTCAATAGCATTATCTGCAACTAATCATGATGGCAAGGGTT  
TTGAAGTTCAGAAGAAAATGCTGCCAGACAAAAATGTGAAGCTTGGTGATTGTGAATA  
AGAGCTCTGTGATCGAATGCTATAACATTTAATTGCCCATTGATTTTAACATGGCAATTC  
CTGATAATCATATGGAAGCATGAATTATTCTAATGATGTCTGGTCTGTTTTCTCACTCA  
GATATTTGAAATATAAAACAGCCTTGTTTGATTTCTTCTCAATGCATTTTAAGAATAAAC  
TAAGCTTTCATGACTCTAAATATAATGTTTTCATGCTCTCTTGTTTTCTCTTTGTATAATA  
GGAACCAACAGACCAGAGCCTCCCATGTGGATGCAGTGGGCGGGATGGTTGGGCAGCA  
CATGTGGACATTGATCACACACTAGGAATGGAGGTGCTGCAGTGGCCACAAATCTTCTT  
AG

>CD302\_TRINITY\_DN8442\_c0\_g1\_i6

ATATGGGACGTGAGTTGGCCCTCTTTTTTTTTTTTTTTTTTTTTTTTTTTTTTTTTTTGCTAT  
GAATGGATTTTCTTTCATTTCTTGGATACCTTATAGACCAAGACTGAGAAGAAGTTTGCA  
AAGCCTACCCACTTGCCTTAAGTCATTCAGAAGACAGTATTACATGGAACCTAACAAATCC  
TTCCTTCATGTTGTGGAATACAGGAACATGAACACTTTCTTCTTTCAGGGTGGCCTGCAC  
AGGGAGGTTTCATTTCTGAACCTGCTATCAGAAGTGTTAAGGGTACCAAAAACTCTCAGA  
CAACTGTACCACAAACACCTCTGAGAAATTAATCAGCTCAGAGACAACTGTAACACAA  
CACCTCTAGAAACACATTTTCAGACGTCATTTACCTTACAGAGGTGATGCACAAATTAC  
CTTTTTCTGATCCACTGAAAGAAGATATGTTGTGACGAACAACTTTTTTTCTTCTTTTGG  
TGCTGGTTCAGAACATGCATTTTCTTAATTATGTTGCAACAAACATCTGCAGCATATTTCT  
TGTGTGAGAAAATATTTAATTCTGTACTTTAATACCTTTAAGCTGCTACACAGCTAAAAC  
CCATGAGTCCTGAAAATAACAGTGGAAAGTCTGACAAAAGACTCTACAGGTGAACCTTT  
TCACAAATGCATTCAGACTTTTGAAAGAAGGTAATAAACAGATCACTTTTTAGCACATT  
CTACATCCTGATAAGTAACATTTCTATGGCTTTATATAGTTAGTACAAATACTGAAAGG  
ATAAATATTTTCTTGTGGTTTTTCAGATACAGACTTTTAAACTGTTATATATCCTGTGTTAC  
ATGTTCAACTTCCTCAGAGTCTAATAAAATGTGTTTCATCATGTGGAGTTCGGGCTGCTGG  
TTGATAATCAAGTGATGACGATCCCAATGAGGTCTGTTTTCGTTCACACAGGAACCAAA  
ACACTACTGATGAGATACTCACGAATGTGACAGACATGATAACCAGGACAGTAATCAA  
AGCCTTCTTGTACCTTGCTCCAGTGTCCAGATTTGATATGAATGACGGCACATATCTCG  
GCAAGAGGCAAATCTTCACTGTATTGTTTAGTCCAGTTCGAATATGACACTTCTGAGTTG  
TCAAACCATTTCAAACCTATCCGTGTCTGTATCATAAAACATGCCAAGCCAAACTTCTTC  
AGGTCCCTGCCAATTTGTCCTGTAAGTGTTTACTAAAAACACATTTTCTTCTCACTGTTC  
ACACTCACAAGGTCAGCACTGGAAGCTGAAGCTCTGCAGAGTTCCCTTGCATCTTCTAT  
ACCAAGGGAATGTTTTGAAAATTCATCCAAAACAGTATAACATCTGTTCTTATACGATA  
TCCATGAAATCTTAGTCCCAGATGGACATTCTAAACACATAACGGAAGGGCAATGGAA  
TACAAAATAAAAAACAGCCCCAACAAAACAGCAGTGCAGATGCCTTTTTCACTTTCTGC  
ATGTTTATATTTTCATAGTCTAAAACATTACTCGTACTCCACAACGTTTTGGTCTGCAAC

>CD22\_TRINITY\_DN22556\_c1\_g1\_i5

TATATATATATATATATATATATATATATATATATATATATATACATATATAAAATCCAGTTTTCA  
CAGGGTGAATCAAATGAACCTTATGATGTAATTCAGAGCTGCTAGGACACCTGTATTTCT  
ACAGCTGTAGTTATTTTTGAGGTCACCTTGTTGTGTGTCAGCAACTGTTTAAAGAAATAAT  
GAACAGATAATTTCCACCCACTGAGAAACATATGATAAATGATAAGATTCTCTGACTG  
AAATTGCATTTACATTGAAATATGAGGAATGCAAGTCATATCTGAAACCAGATTTTCATG  
CCATTTTGTGTGTCACAGAATCTTTGTTCTCTAAAATATGTTACATCATTAGCTTGAATTCA  
AAAGTTCCTTTGCAAATATTTTGTGTAATGACTGAGGAAGTATCAACTGAACTTGGGA  
TATCAACTTCTGGTTTTCTTTCTGTTTAAATATGTTATTGCTCATACTGGAATAAAAAATC

TTCTTTTGA CTGCATTATTGGATAATCCCTTTGGTATTTTCCTCTAATGATGCAGAGAAGG  
AAAAAAGGAATAGCAATAACCACTGATATTCCAATTGCTATTAATGCTTCTGTTGCAGC  
TAATAAAGTAGTTGTATCATGTAATTTTAAAGATAATGTCAATGATTTTGTGACCCAAT  
ATCATTGTGTGCTTCACAGCTGAAATTCCCAGTATCTTCAGAACTGATGTTTGTGAACCTT  
TAGCAGCTTCCCGGGCTGAACTGGAAGGTATTCATTTTCTTTATACCACGTGTAGTTTAT  
AACAGGAGGATTGCTGCTTTTATAGTTGCAGGTTAGATGCATGTCTTTTCCTTCTCTTAA  
ATTTATGGGATGGTGTGTTATTTTAACTTCTTTAGGTGGATACATAACATCTATCTCGAAT  
TTCGGGGAATATGCCGATCCAACCTGTGTTATCAGCTTTACACCTGTAAGTACCACTGTG  
ACTGGTCTTAATTTCTTTAATGAATAAATACTTTTCAGAAATTGTCACCTCTCTTTTTGTTA  
ATGTACCAGGCATATGTTGTCACTTCTGGGTACTCCTGTAACTTTGCAGGATAAGTTC  
ATAGAGTCACCTTCCATAATATCCATGGGAGTAATATGAGTAATTTTTACATCTTTTGGT  
GCAAATAAAACATTCAGGATAACTGCAGGAGCACTTTCTATGACAGAATCAACTACAG  
CAAAACATGCATACCGCCAGCATGATTCTCTTTAATGCGGTCAAAGCGCAACTCTCTG  
TCTTCACCAACTATTTCCCAAGACTGTCTACTACGTTTACGCCATTGATATTCTGTGATTT  
TAGCATCACTGTTATTTGTGGAACAAATTAGTTTTACTTTGTCTCCTTCTTTAATAGTCCC  
TTCTGGTTGTACGGTTATGGTTATTACATTTGTGGCACCTATGTGGAAGATCAGAGGAAG  
TAGCAGAATGAATTCCATGTTAGTATGTTTCATTTTTTAAATTACAGCAGAAAAGCCTTT  
ATCTTTGTAAGCAATTTCTTTCCAAACCAATCAGCAACTCTGCATTCCAAAAGGAAAT  
ACTTATTGCAACTGAAACAATACAGCACTTCCACTTTTTCTTTGGCACTCCAGGAGCTC  
TGTGTCCATGCCTTTAAATGTGCTTGAATACATTCTCATTGGGCACACACAAAAGGAAG  
TCA

>MBL2\_TRINITY\_DN1058\_c0\_g2\_i2

GTTTTATTTAAGTATGCACAACCAACTGAATTACATACAGTCATTTTTCATATGATGTGT  
ATAGGTATGCCTCATTCCACTCTACTTACAGAAAACAAAAATAAAGACAACCTTGCCAA  
TTGTAAAGTTTAGAATCAATTTACTTTAAAGTACAAAATATGTAATGACTTGTACAAAC  
AGATGCTATTCTCTTATAAAAAATAATGGCAGTGCTGAATATATTTTTGTATCTCTTTACA  
GGAATGGGCATCACTTATTACTCTATATGATTTGTTTATAATGTAAGTGTAGGATTATG  
TCTTTTTGTATTTGAGTTAAACAAAAACCCATAATTAAGATCAATTGTTCAAATTC  
TGAACCTTTTTCATTAATTCAAGTAATACACTGATATGACATTATTTACAAAAGCAGC  
ATAACTATATGAAATGCATATATTCCACTAGTATAAAACAACTTAGAAACATCCTAGA  
TATTCCTCACAGATACTTTGCCAAGCAGTTCGCCAAAGTATATACAGTTATACAACAAC  
CTACAAACTGTTATATATTATTGTTTATTTGAAATCATTCCAACAGATCAGGCTTACCTT  
ATATACTGTGCGGTAATTGTTTTTTTTAACATGTTAGTCATTATATCTGGTTTGTGAGGGA  
AGAATACTACCAAAATAAATACTTTGTTATTCTCTGTCTAATGTTTGTACTCACTGCA  
GGCTTCATTTGTGAAAGCAACCAAGCCAGTAAGTATACCATTTAATGTAAAAAAA  
AAGAGTTGTGTGTCCCACTATGACAATAATTCAGTGGCAATCATTCTGCATCCTCACAT  
GAAAAAAGATAATCCTAAAAGCTGGGTCAATTGCCAATCTTGCATCATTTATTGTTAAT  
GTTTCTGTTTTAATGTCCTTAATATCAAAATATTCCTTCACAGCTCATCACAGGTATTTAA  
TTCTTCAATATTATTTAAAGAACAAAAACATAAAAAATGAAAGTACGCACCATAAG  
GTTATGAAGAAAGGATGCTGAGCTAAGTTACTTAAATCATAAAACTATGATTGTTACCC  
TTAAATTAGAGACAGGAATATTGTAACATTACTTAGCTGATGAAGAACACATTAACTG  
TAATTAAGTTTGGAGCTTACTCAACGCATAGTGATAAAAAGAATCCACTGATAAAAC  
AAATGGTTTCCATGCTAAGGCAAAATCAATGAAATTACTGTGAGACTTCTGAAAAATCA  
TTTACAACCTCACAGATAACAAGACAATGATTTGAACAGGGCTTGTCACTTCCACTTTCT  
GTGGTTTGTATTGATGCACAATCTTCAGCATTATTATGATTATTTGGTTCACCAGAATTCC  
ATTTTGAATATTTTATGGATTCCCATCTAAATATACAAATTTGCCTTCTGTTTTTTCATCT  
GAAACTGCAATCCATGCATCTTCTTGACCCTCTTTACAATTTCTTCTATAGCTTTGTTTT  
CAGCTTCTGTCAATTGGAACAGCCATTTCGAGAACCAACACGTGCACATTCTGACTTGGCA  
GTTGAAAAGTCAGACATTGTTTCTCCAGTAAAAAATGTTTTGTCTCCAACCTTCCAGCTT  
TTACCTAGGAACCTGCAAACTGGAATTCCTGGACTGCCAGTTGCACCTTTCATCCCTTCA

TTTCCCTTTGGGCCTGTTGACCCAGTAGCTCCCTTTTGTGCAGCAGGGCCTGCTTTTCCTG  
GAGGACCTTGAGCCCCCTTTAATCCTTGTCTGGTGGGCCTGTATTCCTTTGTCACCCTT  
AAGTCCATCTCTCCCTGGTAATCCAGGTATTCCTGGTATTCCTGAACTGCAATACATGT  
TGGCTGGTTTGCAGGAGATTGACAAAAAGCTGCCATTAGCATTATCACAGCTGTGAAAA  
TACTGAATGGGTGAAGAAGCATGATTTGAGCAGTAACTAGGAGCCTTCTCAGTGAAG  
AACTTGTCTAACTGCACACATGCGAAGAGTCCACATCAGGAATCAAACCTCTGGGACT  
TCCAGGGGATGGTCTGAGCCAGCAGCAGTGCTTTCACACAGCTCTTCCTCCATAAAAAA  
GAATTCTCAAGCCAAAGGGA
